# Supplementary material for: Enantioselective synthesis of spiro γ-butyrolactones by N-heterocyclic carbene (NHC)-catalyzed formal [3 + 2] annulation of enals with 3-hydroxy oxindoles
Source: Royal Society of Chemistry journal article supplement (doi:10.1039/c7ob00148g), 2017-01-01
Supplement: c7ob00148g1.pdf [file c7ob00148g1.pdf]

# Enantioselective synthesis of spiro $\gamma$ -butyrolactones by N-heterocyclic carbene (NHC)-catalyzed formal [3+2] annulation of enals with 3-hydroxy oxindoles

Subrata Mukherjee,<sup>a</sup> Sumi Joseph,<sup>a</sup> Anup Bhunia,<sup>a</sup> Rajesh G. Gonnade,<sup>b</sup>  
Santhivardhana Reddy Yetra,<sup>a,\*</sup> and Akkattu T. Biju<sup>a,\*</sup>

<sup>a</sup> Organic Chemistry Division, and <sup>b</sup> Center for Materials Characterization,  
CSIR-National Chemical Laboratory (CSIR-NCL), Dr. Homi Bhabha Road,  
Pune - 411008, India.

E-mail: y.santhivardhana@ncl.res.in; at.biju@ncl.res.in

## Supporting Information

|                                                                                           |     |
|-------------------------------------------------------------------------------------------|-----|
| 1. General Information                                                                    | S2  |
| 2. General Procedure for the Optimization of the Reaction Conditions                      | S3  |
| 3. Optimization Studies                                                                   | S4  |
| 4. General Procedure for the Enantioselective Synthesis of Spiro $\gamma$ -butyrolactones | S5  |
| 5. X-ray data of <b>3n</b>                                                                | S6  |
| 6. Mechanistic Experiments                                                                | S7  |
| 7. Synthesis and Characterization of Spiro $\gamma$ -butyrolactones                       | S20 |
| 8. <sup>1</sup> H and <sup>13</sup> C NMR Spectra of Spiro $\gamma$ -butyrolactones       | S30 |
| 9. HPLC data of Spiro $\gamma$ -butyrolactones                                            | S45 |

## 1. General Information

Unless otherwise specified, all reactions were carried out under an atmosphere of argon in flame-dried reaction vessels with Teflon screw caps. Dry DME was purchased from commercial sources and stored under argon over 4 Å molecular sieves. The  $\alpha,\beta$ -unsaturated aldehydes **2a**, **2b**, **2h**, **2j** were purchased from commercial sources and were used without further purification, and others were synthesized following the literature procedure.<sup>1</sup> The dioxindole derivatives were synthesized by following the literature procedure.<sup>2</sup> The triazolium salt **4** was synthesized following the literature procedure.<sup>3</sup>

Analytical thin layer chromatography was performed on TLC Silica gel 60 F<sub>254</sub>. Visualization was accomplished with short wave UV light or KMnO<sub>4</sub> staining solutions followed by heating. Flash chromatography was performed on silica gel (230-400 mesh) by standard techniques eluting with Pet. Ether-EtOAc solvent system.

All compounds were fully characterized. <sup>1</sup>H and <sup>13</sup>C NMR spectra were recorded on Bruker AV 400, in CDCl<sub>3</sub> as solvent. Chemical shifts ( $\delta$ ) are given in ppm. The residual solvent signals were used as references and the chemical shifts converted to the TMS scale (CDCl<sub>3</sub>:  $\delta$ H = 7.26 ppm,  $\delta$ C = 77.16 ppm). *In most of the cases, the two diastereomers are separable. Only in case of **3k**, **3l** and **3m** the diastereomers are inseparable.* Infrared spectra were recorded on a Perkin-Elmer 1615 FT Infrared Spectrophotometer Model 60B. The wave numbers ( $\nu$ ) of recorded IR-signals are quoted in cm<sup>-1</sup>. HRMS (ESI) data were recorded on a Thermo Scientific Q-Exactive, Accela 1250 pump. Optical rotation was measured with a JASCO P 2000 digital polarimeter at rt using 50 mm cell of 1 mL capacity. HPLC analysis was performed on Agilent Technologies 1260 Infinity with UV detector, and compound **3h**, **3i** were analyzed on Shimadzu Class-VP V6.12 SP5 with UV detector. X-ray intensity data were collected on a Bruker SMART APEX II CCD diffractometer with graphite-monochromatized (Mo K $\alpha$ =0.71073 Å) radiation at ambient temperature.

---

<sup>1</sup> A. A. Wubea, A. Hufner, C. Thomaschitz, M. Blunder, M. Kollroser, R. Bauer, F. Bucar, *Bioorg. Med. Chem.*, 2011, **19**, 567.

<sup>2</sup> B. M. Trost and K. Hirano, *Org. Lett.*, 2012, **14**, 2446.

<sup>3</sup> J. R. Struble, and J. W. Bode, *Org. Synth.*, 2010, **87**, 362.

## 2. General Procedure for the Optimization of Reaction Conditions

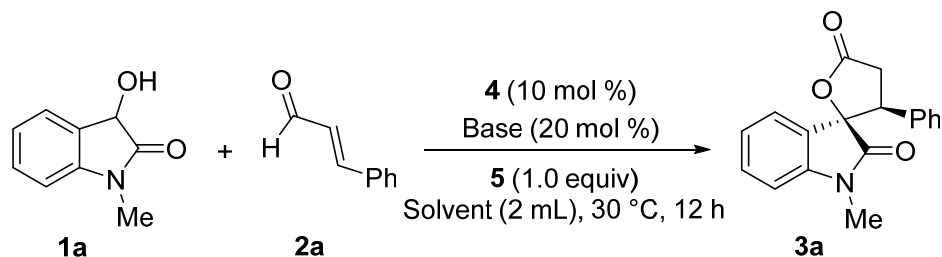

To a flame-dried screw-capped test tube equipped with a magnetic stir bar was added the triazolium salt **4** (0.009 g, 0.025 mmol) and dioxindole **1a** (0.25 mmol) and enal **2a** (0.25 mmol) was added. Then the screw-capped tube was evacuated and backfilled with argon. To this mixture was added solvent (2.0 mL) under argon atmosphere. The resultant reaction mixture was kept stirring at 30 °C. To this mixture base (0.05 mmol) was successively added. After 12 h the reaction was quenched and the mixture was diluted with CH<sub>2</sub>Cl<sub>2</sub> (2.0 mL) and filtered through a short pad of silica gel and eluted with CH<sub>2</sub>Cl<sub>2</sub> (10 mL). The solvent was evaporated to obtain the crude products, which was analyzed using <sup>1</sup>H NMR using CH<sub>2</sub>Br<sub>2</sub> (18.0 μL, 0.25 mmol) as the internal standard. The enantiomeric excess was determined by HPLC analysis on a chiral column.

### 3. Optimization Studies

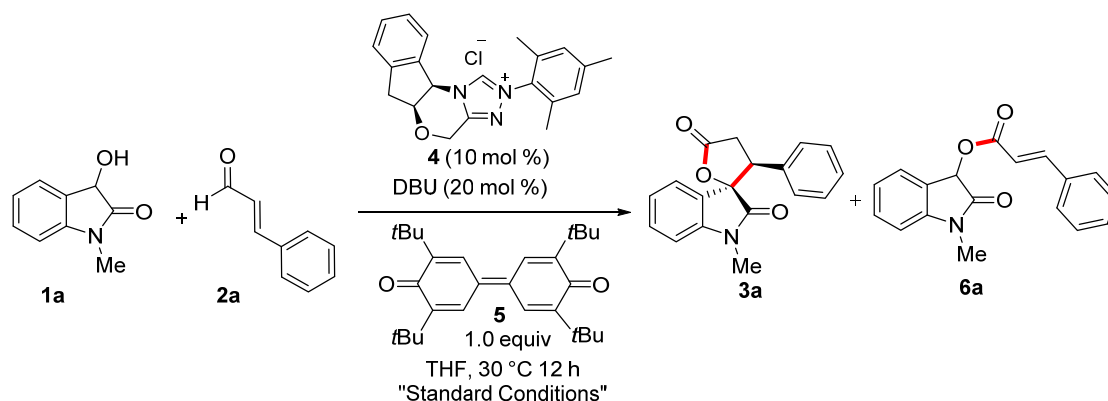

| entry     | variation of the standard conditions           | yield of <b>3a</b> (%) | <i>d.r</i> of <b>3a</b> <sup>b</sup> | <i>er</i> of <b>3a</b> (%) <sup>c</sup> | yield of <b>6a</b> (%) |
|-----------|------------------------------------------------|------------------------|--------------------------------------|-----------------------------------------|------------------------|
| 1         | None                                           | 86                     | 4:1                                  | 87:13                                   | -                      |
| 2         | Na <sub>2</sub> CO <sub>3</sub> instead of DBU | 10                     | >10:1                                | 53:47                                   | 74                     |
| 3         | KO <sup><i>t</i></sup> -Bu instead of DBU      | 31                     | >10:1                                | 53:47                                   | 33                     |
| 4         | DABCO instead of DBU                           | 15                     | >10:1                                | 57:43                                   | 57                     |
| 5         | DMAP instead of DBU                            | 25                     | >10:1                                | 65:35                                   | 41                     |
| 6         | TBD instead of DBU                             | 75                     | 6:1                                  | 82:18                                   | -                      |
| 7         | toluene instead of THF                         | 68                     | 10:1                                 | 60:40                                   | -                      |
| 8         | CH <sub>2</sub> Cl <sub>2</sub> instead of THF | 89                     | 2:1                                  | 88:12                                   | -                      |
| 9         | CHCl <sub>3</sub> instead of THF               | 84                     | 2:1                                  | 60:40                                   | -                      |
| 10        | CH <sub>3</sub> CN instead of THF              | 86                     | 3:1                                  | 70:30                                   | -                      |
| 11        | 1,4-dioxane instead of THF                     | 98                     | 10:1                                 | 75:25                                   | -                      |
| 12        | DME instead of THF                             | 84                     | 4:1                                  | 89:11                                   | -                      |
| 13        | 50 mol % of LiCl in standard condition         | 81                     | 3:1                                  | 95:5                                    | -                      |
| 14        | 20 mol % of LiCl in DME                        | 77                     | 3:1                                  | 95:5                                    | -                      |
| <b>15</b> | <b>50 mol % of LiCl in DME</b>                 | <b>82(82)</b>          | <b>4:1</b>                           | <b>95:5</b>                             | -                      |
| 16        | 1 equiv of LiCl in DME                         | 78                     | 3:1                                  | 95:5                                    | -                      |
| 17        | 2 equiv of LiCl in DME                         | 91                     | 5:1                                  | 94:6                                    | -                      |
| 18        | 3 equiv of LiCl in DME                         | 88                     | 5:1                                  | 92:8                                    | -                      |
| 19        | 4 equiv of LiCl in DME                         | 95                     | 5:1                                  | 94:6                                    | -                      |

<sup>a</sup> Standard conditions: **1a** (0.25 mmol), **2a** (0.25 mmol), **4** (10 mol %), DBU (20 mol %), THF (2.0 mL), 30 °C and 12 h. The yields were determined by <sup>1</sup>H-NMR analysis of crude products using CH<sub>2</sub>Br<sub>2</sub> as the internal standard, isolated yield in parentheses. <sup>b</sup> Determined by <sup>1</sup>H-NMR Spectroscopy of crude reaction mixture <sup>c</sup> Determined by HPLC analysis on a chiral column.

#### 4. General Procedure for the Enantioselective Synthesis of Spiro $\gamma$ -Butyrolactones

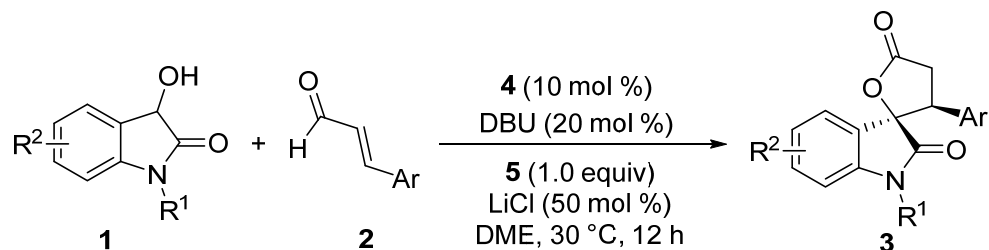

To a flame-dried screw-capped test tube equipped with a magnetic stir bar was added the triazolium salt **4** (0.009 g, 0.025 mmol) and dioxindole **1** (0.25 mmol) and enal **2** (0.25 mmol), and LiCl (0.125 mmol) was added. Then the screw-capped tube was evacuated and backfilled with argon. To this mixture was added DME (2.0 mL) under argon atmosphere. The resultant reaction mixture was kept stirring at 30 °C. To this mixture DBU (0.008 gm, 7.5  $\mu$ L, 0.05 mmol) was successively added. After 12 h, when the reaction is complete, the solvent was evaporated and the crude residue was purified by flash column chromatography on silica gel to afford the corresponding functionalized spiro  $\gamma$ -butyrolactone. All the racemic compounds were synthesized using IMes.HCl (10 mol %) and DBU (20 mol %) in THF solvent.

## 5. X-ray Data of **3n**

X-ray intensity data measurements of compound **3n** was carried out on a Bruker SMART APEX II CCD diffractometer with graphite-monochromatized ( $\text{MoK}_\alpha = 0.71073 \text{ \AA}$ ) radiation at 100(2) K. The X-ray generator was operated at 50 kV and 30 mA. A preliminary set of cell constants and an orientation matrix were calculated from three sets of 36 frames. Data were collected with  $\omega$  scan width of  $0.5^\circ$  at different settings of  $\varphi$  and  $2\theta$  with a frame time of 15 secs keeping the sample-to-detector distance fixed at 5.00 cm. The X-ray data collection was monitored by APEX2 program (Bruker, 2006).<sup>4</sup> All the data were corrected for Lorentzian, polarization and absorption effects using SAINT and SADABS programs (Bruker, 2006). SHELX-97 was used for structure solution and full matrix least-squares refinement on  $F^2$ .<sup>5</sup> All the hydrogen atoms were placed in geometrically idealized position and constrained to ride on their parent atoms. An *ORTEP* III<sup>3</sup> view of both compounds were drawn with 50% probability displacement ellipsoids and H atoms are shown as small spheres of arbitrary radii. The absolute configuration of the molecule was found by using Flack parameter refinement.<sup>6</sup> A value of Flack parameter of 0.15(6) established that the configuration of atoms C1 is *R* and C11 is *S*.

Crystal data of **3n**  $\text{C}_{18}\text{H}_{14}\text{ClNO}_3$ ,  $M = 327.75$ , colorless plate,  $0.43 \times 0.31 \times 0.20 \text{ mm}^3$ , monoclinic, space group  $P2_1$ ,  $a = 9.020(4) \text{ \AA}$ ,  $b = 10.237(4) \text{ \AA}$ ,  $c = 9.318(4) \text{ \AA}$ ,  $\beta = 117.399(6)^\circ$ ,  $V = 764.0(5) \text{ \AA}^3$ ,  $Z = 2$ ,  $T = 100(2) \text{ K}$ ,  $2\theta_{\text{max}} = 50.00^\circ$ ,  $D_{\text{calc}} (\text{g cm}^{-3}) = 1.425$ ,  $F(000) = 340$ ,  $\mu (\text{mm}^{-1}) = 0.265$ , 9508 reflections collected, 2640 unique reflections ( $R_{\text{int}} = 0.0883$ ), 2245 observed ( $I > 2\sigma(I)$ ) reflections, multi-scan absorption correction,  $T_{\text{min}} = 0.8947$ ,  $T_{\text{max}} = 0.9490$ , 209 refined parameters, number of restraints = 31,  $S = 1.122$ ,  $R1 = 0.0457$ ,  $wR2 = 0.1121$  (all data  $R = 0.0691$ ,  $wR2 = 0.1350$ ), maximum and minimum residual electron densities;  $\Delta\rho_{\text{max}} = 0.578$ ,  $\Delta\rho_{\text{min}} = -0.671 (\text{e \AA}^{-3})$ .

<sup>4</sup> Bruker (2006). *APEX2*, *SAINTE* and *SADABS*. Bruker AXS Inc., Madison, Wisconsin, USA.

<sup>5</sup> G. M. Sheldrick, *Acta Crystallogr.*, 2008, **A64**, 112.

<sup>6</sup> L. J. Farrugia, *J. Appl. Cryst.* 1997, **30**, 565.

## 6. Mechanistic Experiments

### *Procedure for the Enantioselective Synthesis of Spiro $\gamma$ -Butyrolactone in absence of oxidant (Scheme 5, eq 3)*

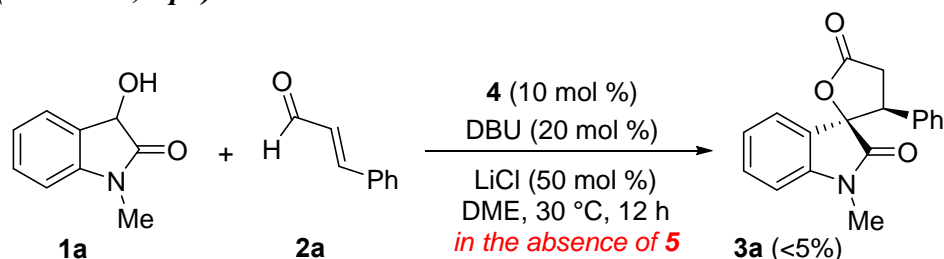

To a flame-dried screw-capped test tube equipped with a magnetic stir bar was added the triazolium salt **4** (0.009 g, 0.025 mmol) and isatin alcohol **1a** (0.25 mmol) and enal **2a** (0.25 mmol) and LiCl (0.125 mmol) was added. Then the screw-capped tube was evacuated and backfilled with argon. To this mixture was added DME (2.0 mL) under argon atmosphere. The resultant reaction mixture was kept stirring at 30 °C. To this mixture DBU (0.008 gm, 7.5  $\mu$ L, 0.05 mmol) was successively added. After 12 h, the reaction is quenched and the mixture was diluted with  $\text{CH}_2\text{Cl}_2$  (2.0 mL) and filtered through a short pad of silica gel and eluted with  $\text{CH}_2\text{Cl}_2$  (10 mL). The solvent was evaporated to obtain the crude product, which was analyzed using  $^1\text{H}$  NMR using  $\text{CH}_2\text{Br}_2$  (18.0  $\mu$ L, 0.25 mmol) as the internal standard. Under these conditions, only traces of product **3a** was observed.

*This experiment indicates the role of oxidant **5** in generating the  $\alpha,\beta$ -unsaturated acyl azolium intermediate. It is noteworthy that under these conditions, the formation of the corresponding *N*-substituted isatin was also not observed.*

### *Procedure for the Enantioselective Synthesis of Spiro $\gamma$ -Butyrolactone by Reactions of Dioxindole with 2-Bromoenal (Scheme 5, eq 4)*

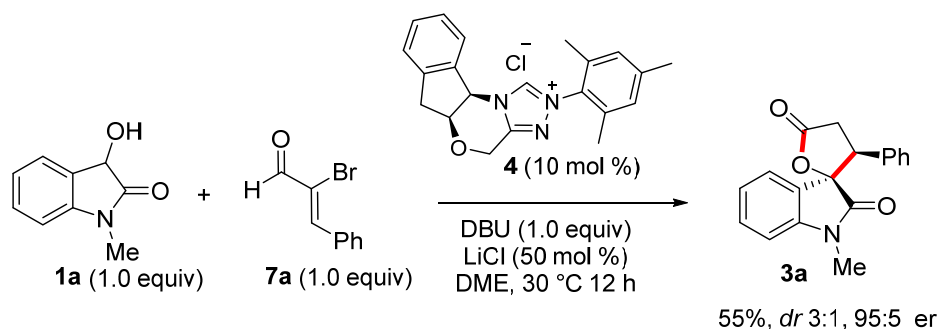

To a flame-dried screw-capped test tube equipped with a magnetic stir bar was added the triazolium salt **4** (0.009 g, 0.025 mmol) and dioxindole **1a** (0.25 mmol) and 2-bromoenal **7a** (0.25 mmol) and LiCl (0.125 mmol) was added. Then the screw-capped tube was evacuated and backfilled with argon. To this mixture was added DME (2.0 mL) under argon atmosphere. The resultant reaction mixture was kept stirring at 30 °C. To this mixture DBU (0.038 gm, 37.0 μL, 0.05 mmol) was successively added. After 12 h the reaction is quenched and the mixture was diluted with CH<sub>2</sub>Cl<sub>2</sub> (2.0 mL) and filtered through a short pad of silica gel and eluted with CH<sub>2</sub>Cl<sub>2</sub> (10 mL). The solvent was evaporated to obtain the crude product, which was analyzed using <sup>1</sup>H NMR using CH<sub>2</sub>Br<sub>2</sub> (18.0 μL, 0.25 mmol) as the internal standard.

### <sup>1</sup>H-NMR of (2*R*,3*S*)-1'-Methyl-3-phenyl-3,4-dihydro-5*H*-spiro[furan-2,3'-indoline]-2',5-dione (**3a**)

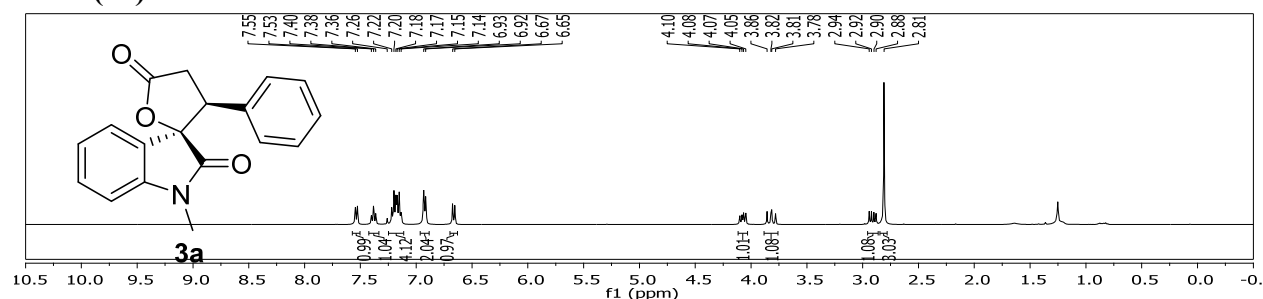

### <sup>1</sup>H-NMR of Crude Reaction Mixture

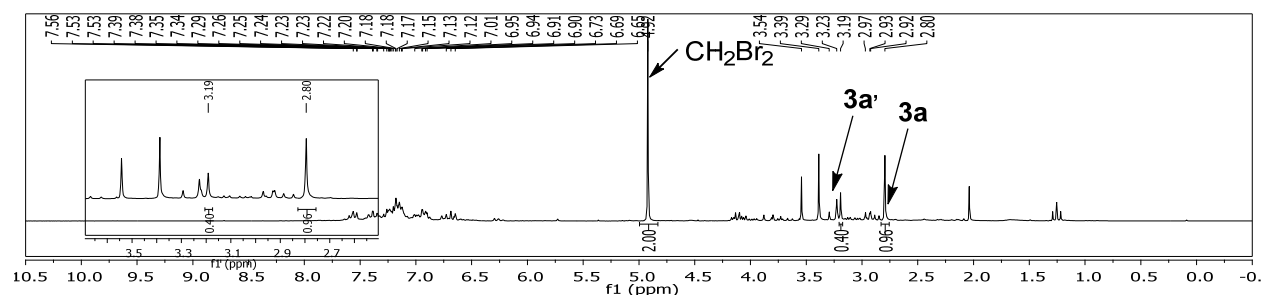

### HPLC data of spiro $\gamma$ -butyrolactone **3a**

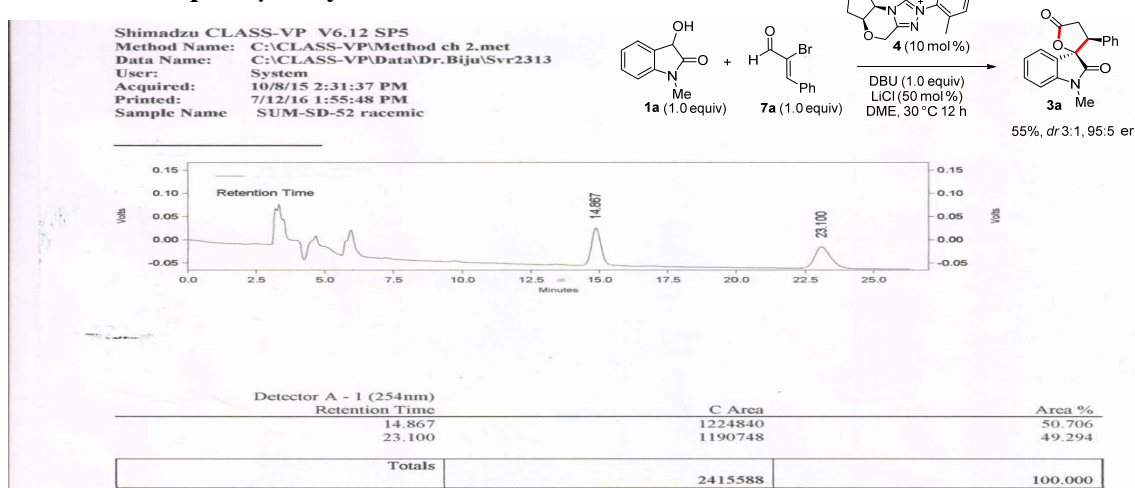



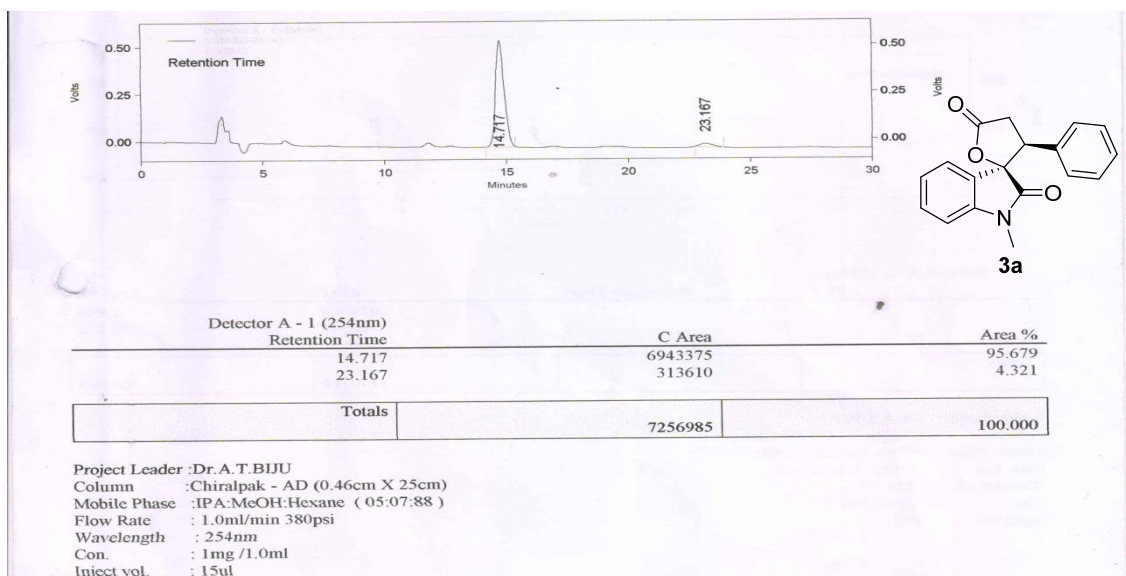

The formation of **3a** under these conditions clearly indicate the intermediacy of chiral  $\alpha,\beta$ -unsaturated acyl azolium intermediate.

**Procedure for the Reaction of Dioxindole with Bromoenal in  $\text{Na}_2\text{CO}_3$  as base, leading to  $\alpha,\beta$ -unsaturated ester formation (Scheme 5, eq 5)**

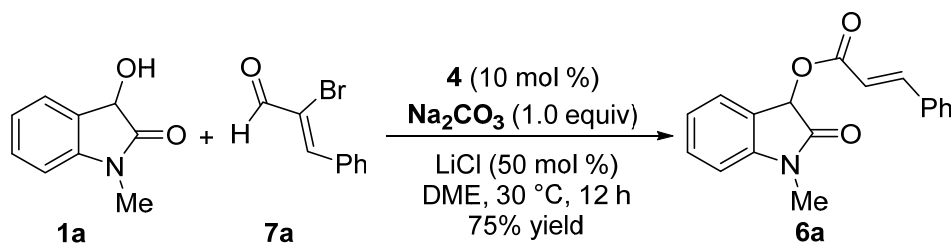

To a flame-dried screw-capped test tube equipped with a magnetic stir bar was added the triazolium salt **4** (0.009 g, 0.025 mmol) and dioxindole **1a** (0.25 mmol) and 2-bromoenal **7a** (0.25 mmol) and LiCl (0.125 mmol) was added. Then the screw-capped tube was evacuated and backfilled with argon. To this mixture was added DME (2.0 mL) under argon atmosphere. The resultant reaction mixture was kept stirring at 30 °C. To this mixture  $\text{Na}_2\text{CO}_3$  (0.026 gm, 0.25 mmol) was successively added. After 12 h the reaction is quenched and the mixture was diluted with  $\text{CH}_2\text{Cl}_2$  (2.0 mL) and filtered through a short pad of silica gel and eluted with  $\text{CH}_2\text{Cl}_2$  (10 mL). The solvent was evaporated to obtain the crude product, which was analyzed using  $^1\text{H}$  NMR using  $\text{CH}_2\text{Br}_2$  (18.0  $\mu\text{L}$ , 0.25 mmol) as the internal standard.

### <sup>1</sup>H-NMR of 1-methyl-2-oxindolin-3-yl cinnamate (6a)

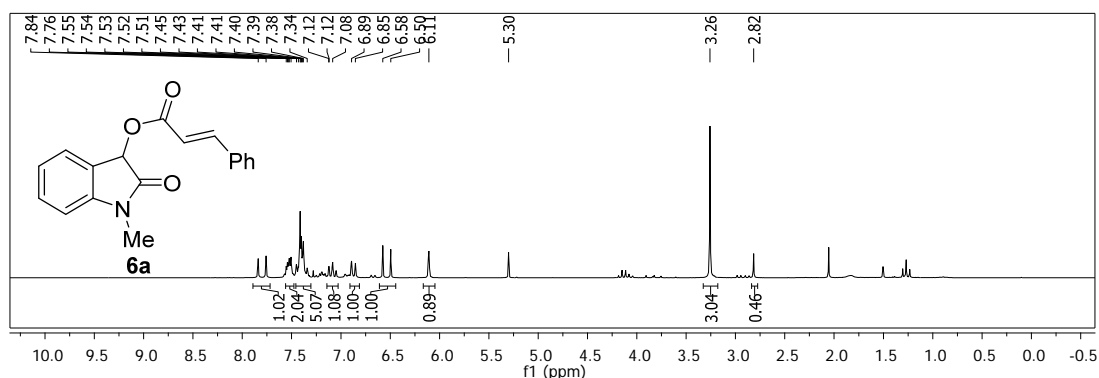

### <sup>1</sup>H-NMR of Crude Reaction Mixture (Scheme 3 eq 4)

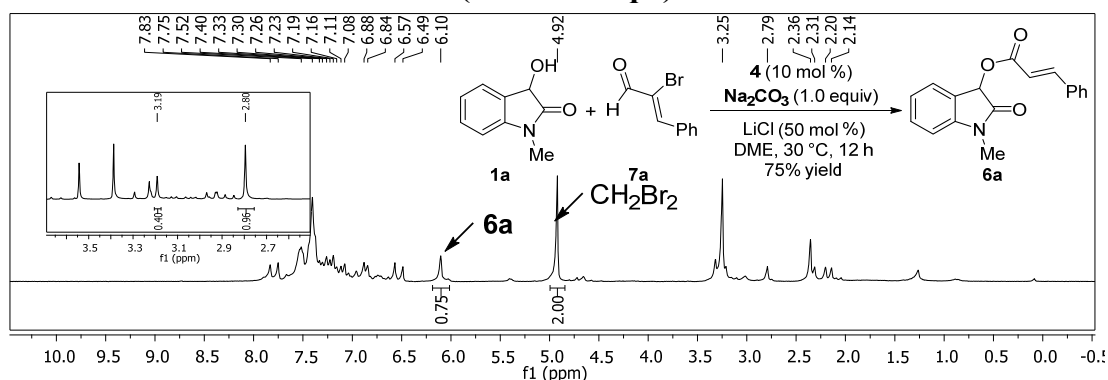

It is reasonable to believe that the use of an inorganic base allowed the 1,2-addition of the dioxindole onto the chiral  $\alpha,\beta$ -unsaturated acyl azolium intermediate.

### Procedure for the Enantioselective Synthesis of Spiro $\gamma$ -Butyrolactone by Reactions of Dioxindole with ynal (Scheme 5, eq 6)

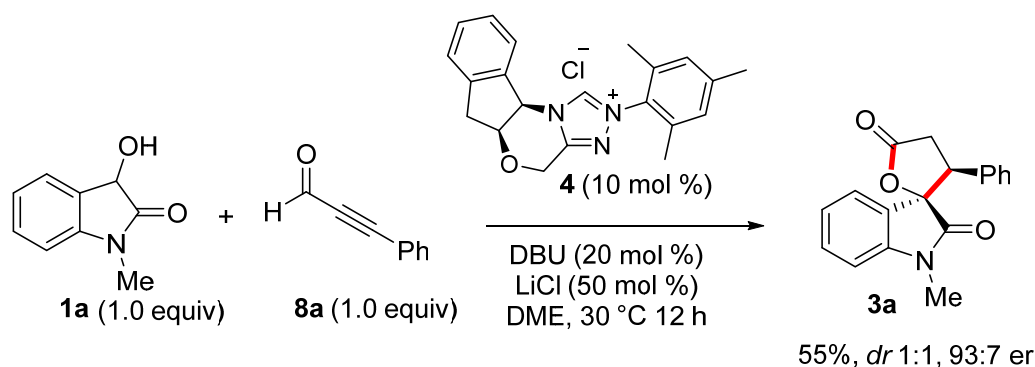

To a flame-dried screw-capped test tube equipped with a magnetic stir bar was added the triazolium salt 4 (0.009 g, 0.025 mmol) and dioxindole 1a (0.25 mmol) and ynal 8a (0.25 mmol) and LiCl (0.125 mmol) was added. Then the screw-capped tube was evacuated and backfilled with argon. To this mixture was added DME (2.0 mL) under argon atmosphere.

The resultant reaction mixture was kept stirring at 30 °C. To this mixture DBU (0.008 gm, 7.5 μL, 0.05 mmol) was successively added. After 12 h the reaction is quenched and the mixture was diluted with CH<sub>2</sub>Cl<sub>2</sub> (2.0 mL) and filtered through a short pad of silica gel and eluted with CH<sub>2</sub>Cl<sub>2</sub> (10 mL). The solvent was evaporated to obtain the crude product, which was analyzed using <sup>1</sup>H NMR using CH<sub>2</sub>Br<sub>2</sub> (18.0 μL, 0.25 mmol) as the internal standard.

### <sup>1</sup>H-NMR of (2*R*,3*S*)-1'-Methyl-3-phenyl-3,4-dihydro-5*H*-spiro[furan-2,3'-indoline]-2',5-dione (3a)

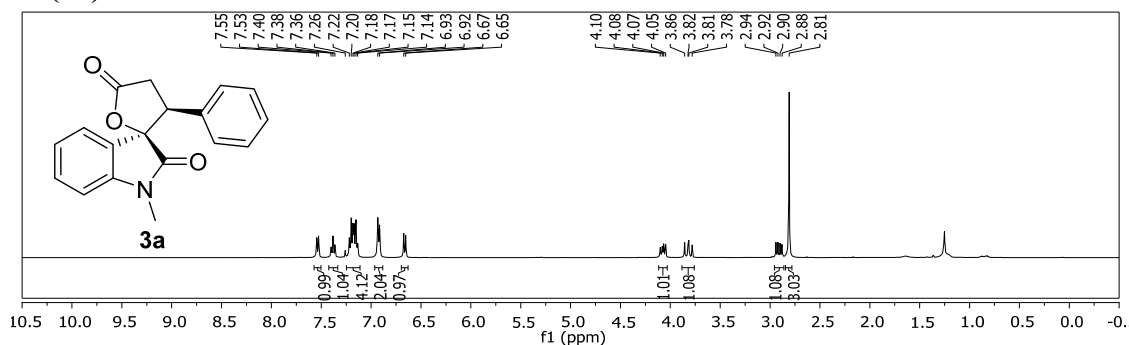

### <sup>1</sup>H-NMR of Crude Reaction Mixture (Scheme 3, eq 5)

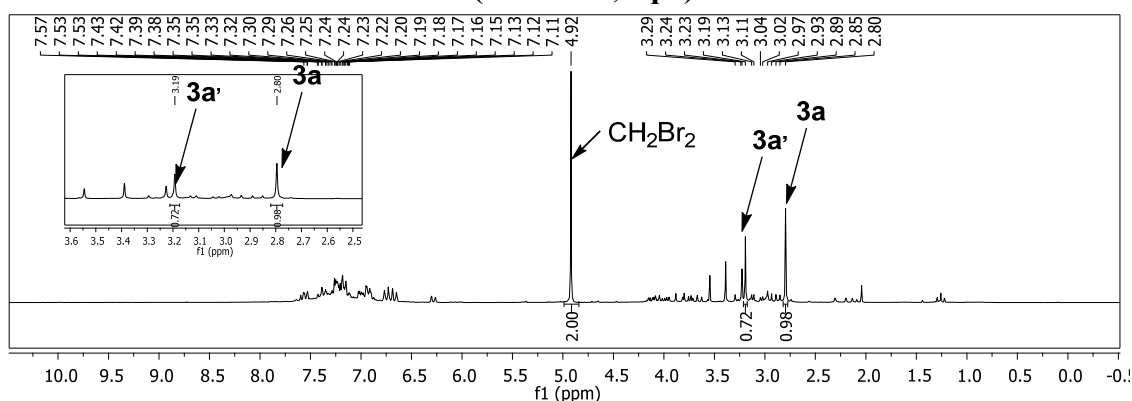

### HPLC data of spiro $\gamma$ -butyrolactone 3a

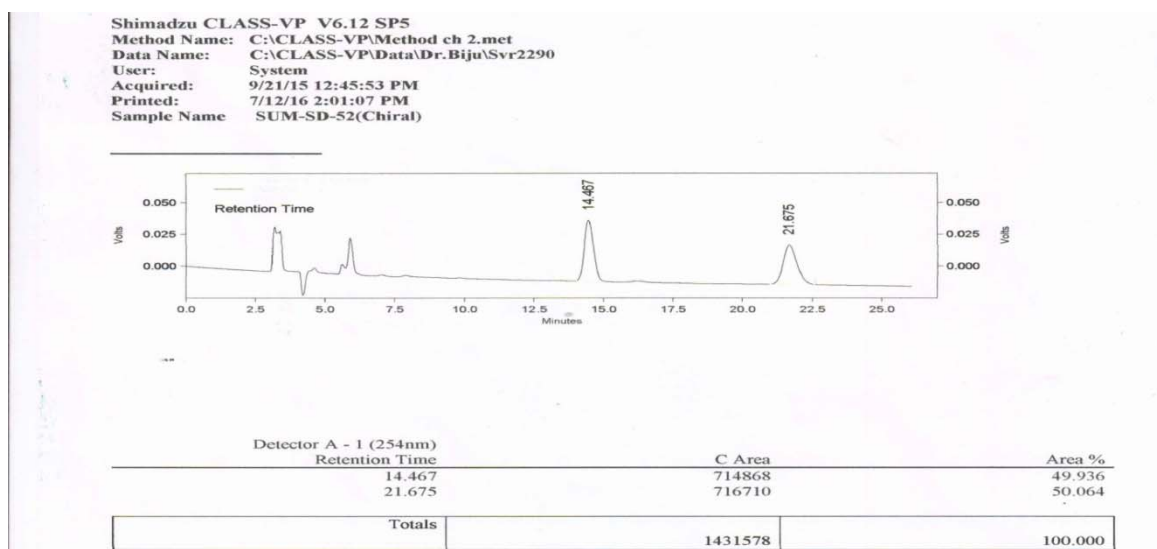

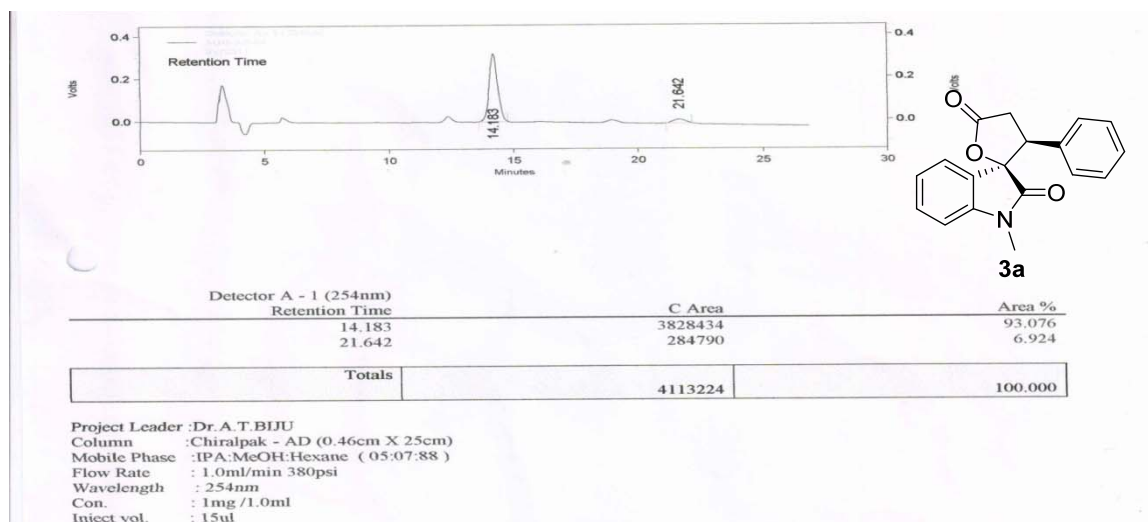

The formation of **3a** under these conditions clearly indicate the intermediacy of chiral  $\alpha,\beta$ -unsaturated acyl azolium intermediate.

#### NHC-catalyzed reaction of dioxindole with aliphatic enal (Scheme 6)

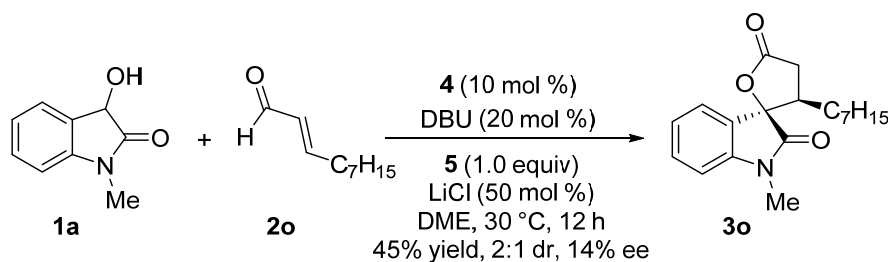

Following the general procedure, treatment of 3-hydroxy-1-methylindolin-2-one **1a** (41.0 mg, 0.25 mmol) and (*E*)-dec-2-enal **2o** (39.0 mg, 46  $\mu$ L, 0.50 mmol) with triazolium salt **4** (9.2 mg, 0.025 mmol), oxidant **5** (102.0 mg, 0.25 mmol), LiCl (5.2 mg, 0.125 mmol), and DBU (7.6 mg, 7.5  $\mu$ L, 0.05 mmol) in DME (2.0 mL) at 30 °C for 12 h followed by column chromatography afforded (*2R,3R*)-3-heptyl-1'-methyl-3,4-dihydro-5*H*-spiro[furan-2,3'-indoline]-2',5-dione (**3o**) as a yellow sticky liquid (35.0 mg, 45% yield, dr 2:1).

$R_f$  (Pet. ether /EtOAc = 70/30): 0.66; 57:43 er, HPLC (Chiralpak AD-H, 88:7:5 PE /MeOH/ IPA, 1.0 mL/min.) Major: 11.1 min, Minor: 7.9 min.  $^1\text{H NMR}$  (400 MHz,  $\text{CDCl}_3$ )  $\delta$  7.42 – 7.30 (m, 2H), 7.11 (t,  $J = 7.5$  Hz, 1H), 6.84 (d,  $J = 7.8$  Hz, 1H), 3.16 (s, 3H), 2.95 (m, 1H), 2.74 (m, 2H), 1.50 – 1.30 (m, 1H), 1.30 – 0.95 (m, 12H), 0.81 (t,  $J = 7.0$  Hz, 3H).  $^{13}\text{C NMR}$  (100 MHz,  $\text{CDCl}_3$ )  $\delta$  175.68, 173.3, 144.5, 131.2, 125.4, 124.3,

123.6, 108.8, 85.6, 45.5, 33.9, 31.7, 29.3, 29.0, 28.4, 28.0, 26.3, 22.6, 14.1. **HRMS** calculated  $[M+Na]^+$  for  $C_{19}H_{25}NO_3Na$ : 338.1727, found: 338.1719. **FTIR** ( $cm^{-1}$ ) 2929, 2861, 2404, 1792, 1726, 1616, 1467, 1422, 1368, 1302, 1216, 1010.

### General Procedure for the Reaction with excess oxidant **5** (Scheme 9)

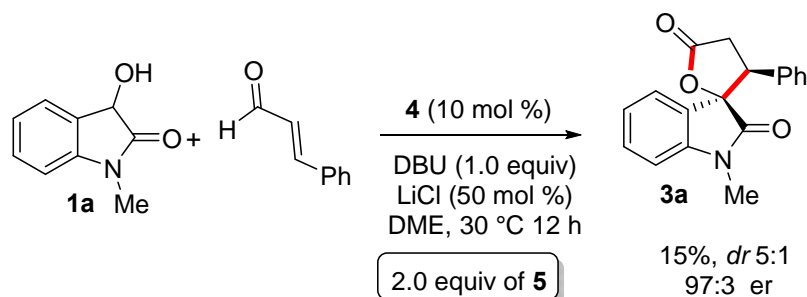

To a flame-dried screw-capped test tube equipped with a magnetic stir bar was added the triazolium salt **4** (0.009 g, 0.025 mmol) and isatin alcohol **1a** (0.25 mmol) and oxidant **5** (0.50 mmol) and LiCl (0.125 mmol) was added. Then the screw-capped tube was evacuated and backfilled with argon. To this mixture was added DME (2.0 mL) under argon atmosphere. The resultant reaction mixture was kept stirring at 30 °C. To this mixture cinnamaldehyde **2a** (0.25 mmol) and DBU (0.008 gm, 7.5  $\mu$ L, 0.05 mmol) was successively added. After 12 h the reaction is quenched and the mixture was diluted with  $CH_2Cl_2$  (2.0 mL) and filtered through a short pad of silica gel and eluted with  $CH_2Cl_2$  (10 mL). The solvent was evaporated to obtain the crude product, which was analyzed using  $^1H$  NMR using  $CH_2Br_2$  (18.0  $\mu$ L, 0.25 mmol) as the internal standard.

### $^1H$ -NMR of (2*R*,3*S*)-1'-Methyl-3-phenyl-3,4-dihydro-5*H*-spiro[furan-2,3'-indoline]-2',5-dione (**3a**)

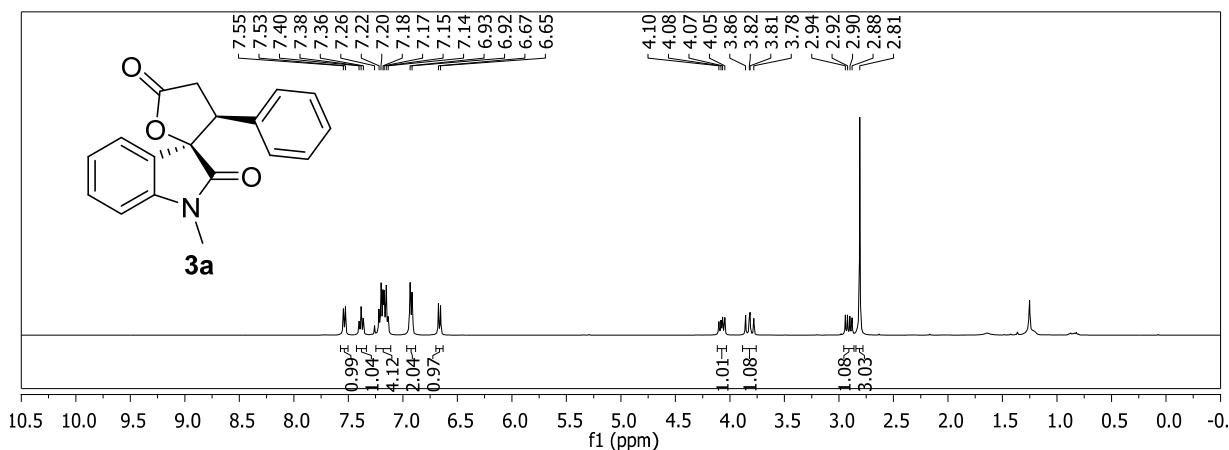

# <sup>1</sup>H-NMR of Crude Reaction Mixture with 2.0 equiv oxidant 5

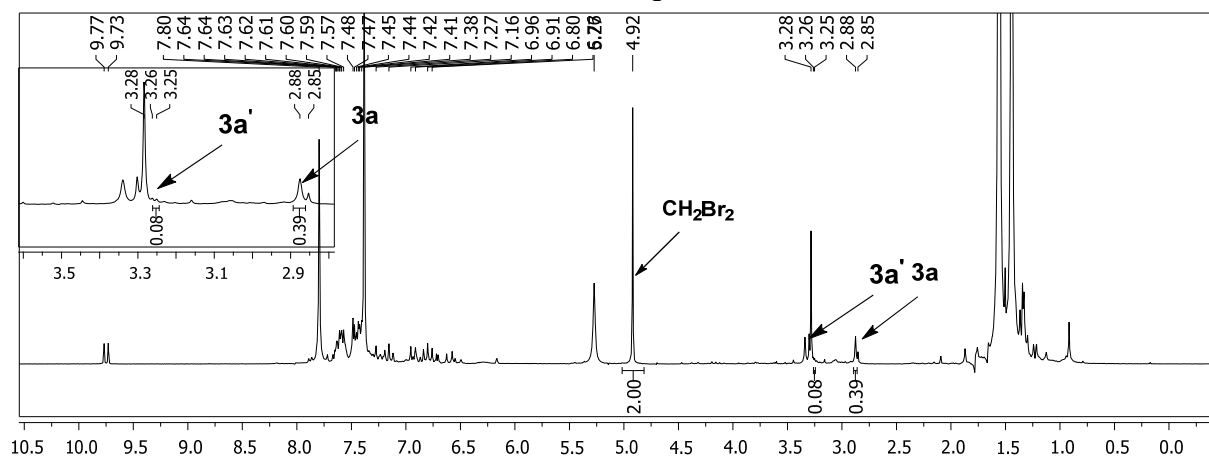

From the above experiments, it is clear that in presence of excess oxidant the reactivity dramatically decreases, which indicates existence of homoenolate reactivity along with  $\alpha,\beta$ -unsaturated acylazolium reactivity.

## HPLC data of spiro $\gamma$ -butyrolactone 3a with 2.0 equiv oxidant loading

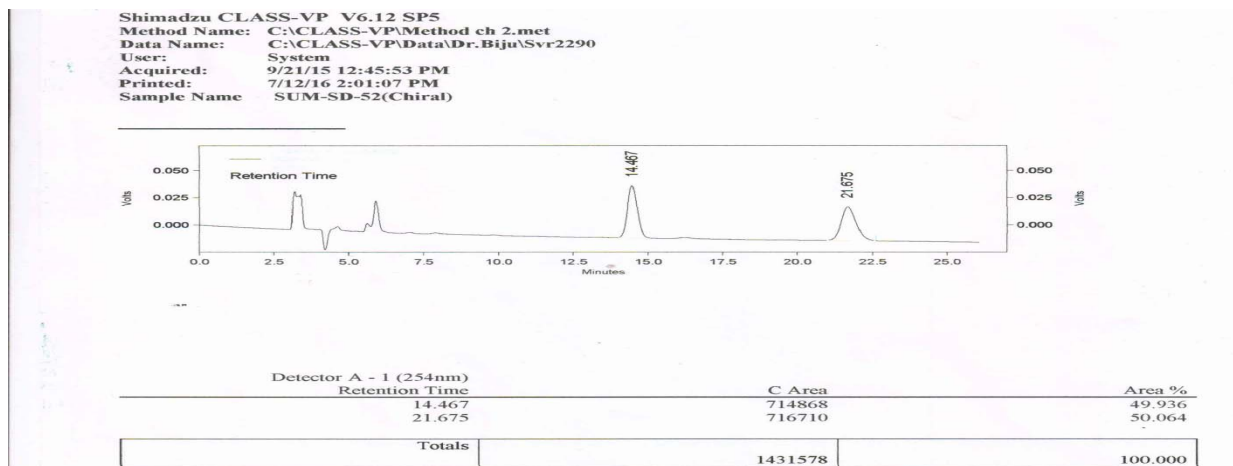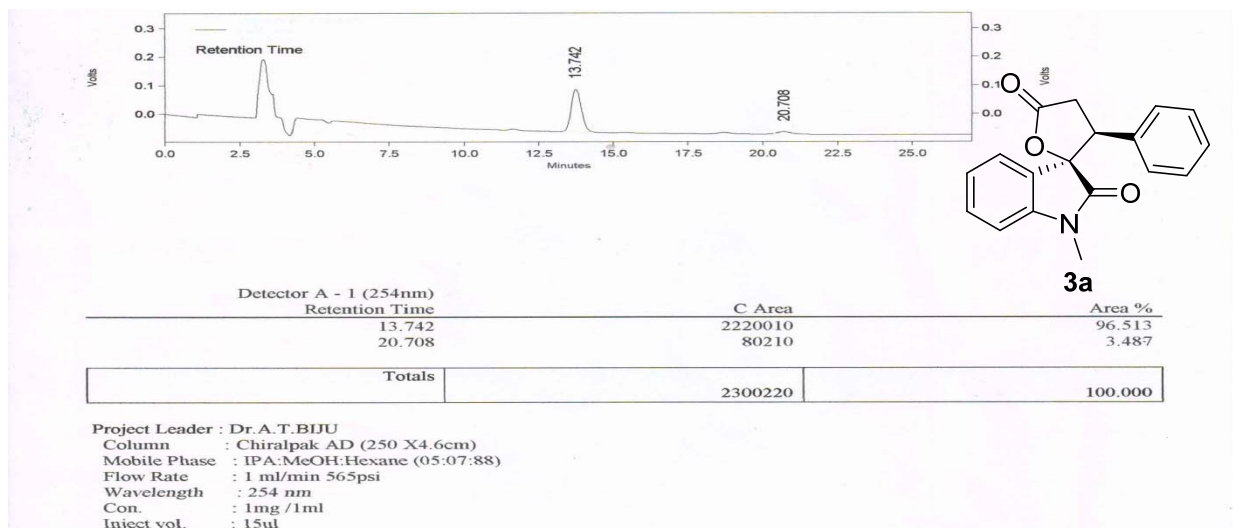

## General Procedure for the Competition experiments between Isatin and Dioxindole

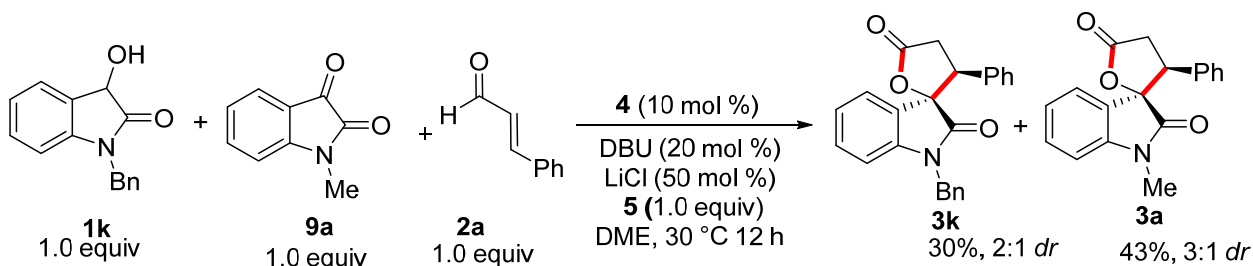

To a flame-dried screw-capped test tube equipped with a magnetic stir bar was added the triazolium salt **4** (0.009 g, 0.025 mmol) and dioxindole **1k** (0.25 mmol) and Isatin **9a** (0.25 mmol) and LiCl (0.125 mmol) was added. Then the screw-capped tube was evacuated and backfilled with argon. To this mixture was added DME (2.0 mL) under argon atmosphere. The resultant reaction mixture was kept stirring at 30 °C. To this mixture mixture cinnamaldehyde **2a** (0.25 mmol) and DBU (0.008 gm, 7.5  $\mu$ L, 0.05 mmol) was successively added. After 12 h the reaction is quenched and the mixture was diluted with CH<sub>2</sub>Cl<sub>2</sub> (2.0 mL) and filtered through a short pad of silica gel and eluted with CH<sub>2</sub>Cl<sub>2</sub> (10 mL). The solvent was evaporated to obtain the crude product, which was analyzed using <sup>1</sup>H NMR using CH<sub>2</sub>Br<sub>2</sub> (18.0  $\mu$ L, 0.25 mmol) as the internal standard.

### <sup>1</sup>H-NMR of (2*R*,3*S*)-1'-Methyl-3-phenyl-3,4-dihydro-5*H*-spiro[furan-2,3'-indoline]-2',5-dione (**3a**)

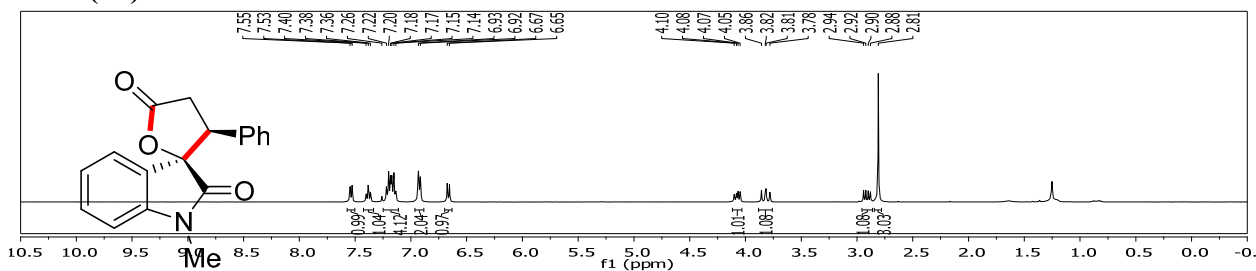

### <sup>1</sup>H-NMR of (2*R*,3*S*)-1'-benzyl-3-phenyl-3,4-dihydro-5*H*-spiro[furan-2,3'-indoline]-2',5-dione (**3k**)

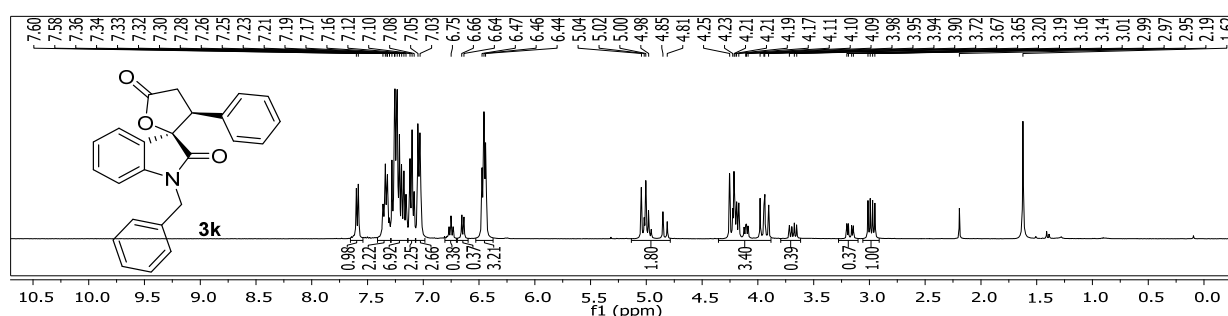

## <sup>1</sup>H-NMR of Crude Reaction Mixture (Scheme 7, eq 6)

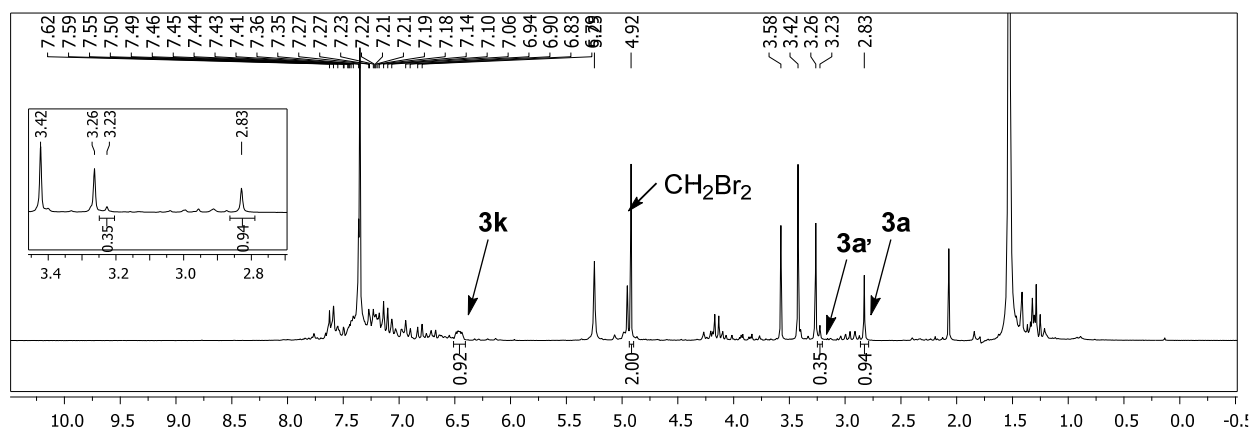

This experiment also indicates the compatibility of the [3+2] annulation of  $\alpha,\beta$ -unsaturated acyl azolium with dioxindoles as well as the [3+2] annulation of NHC-bound homoenolate with isatins under the present conditions.

### Experiments to isatin formation and Homoenate Reactivity

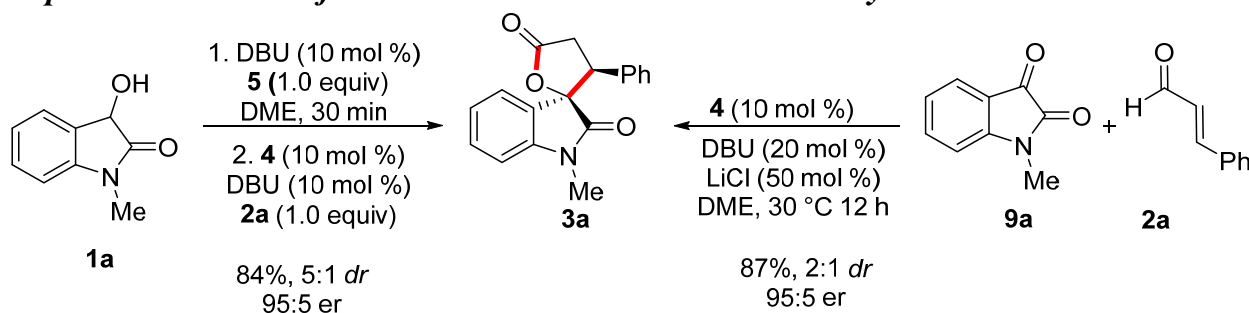

To support homoenate reactivity, we carried out two parallel experiments. In first experiment, to a flame-dried screw-capped test tube equipped with a magnetic stir bar was added DBU (0.004 g, 4.0  $\mu$ L, 0.025 mmol) and isatin alcohol **1a** (0.25 mmol) and oxidant **5** (0.25 mmol) and LiCl (0.125 mmol) in presence of DME (2 mL). The mixture was stirred for 30 min which led to complete conversion of isatin from isatin alcohol. To this reaction mixture, triazolium salt **4** (0.009 g, 0.025 mmol), DBU (0.004 g, 4.0  $\mu$ L, 0.025 mmol) and cinnamaldehyde **2a** (0.25 mmol) was successfully added. After 12 h, the reaction was quenched and the mixture was diluted with  $\text{CH}_2\text{Cl}_2$  (2.0 mL), filtered through a short pad of silica gel and eluted with  $\text{CH}_2\text{Cl}_2$  (10 mL). The solvent was evaporated to obtain the crude reaction mixture, which was analyzed using <sup>1</sup>H NMR using  $\text{CH}_2\text{Br}_2$  (18.0  $\mu$ L, 0.25 mmol) as the internal standard shows spiro lactone in 83% yield and 93% ee.



Similarly in case of second experiments To a flame-dried screw-capped test tube equipped with a magnetic stir bar was added the triazolium salt **4** (0.009 g, 0.025 mmol) and isatin **9a** (0.25 mmol) and LiCl (0.125 mmol). Then the screw-capped tube was evacuated and backfilled with argon. To this mixture was added DME (2.0 mL) under argon atmosphere. The resultant reaction mixture was kept stirring at 30 °C. To this mixture cinnamaldehyde **2a** (0.25 mmol) and DBU (0.008 gm, 7.5  $\mu$ L, 0.05 mmol) was successively added. After 12 h the reaction was quenched and the mixture was diluted with CH<sub>2</sub>Cl<sub>2</sub> (2.0 mL) and filtered through a short pad of silica gel and eluted with CH<sub>2</sub>Cl<sub>2</sub> (10 mL). The solvent was evaporated to obtain the crude reaction mixture, which was analyzed using <sup>1</sup>H NMR using CH<sub>2</sub>Br<sub>2</sub> (18.0  $\mu$ L, 0.25 mmol) as the internal standard shows spiro lactone in 87% yield and 91% ee.

**<sup>1</sup>H-NMR of (2R,3S)-1'-Methyl-3-phenyl-3,4-dihydro-5H-spiro[furan-2,3'-indoline]-2',5-dione (3a)**

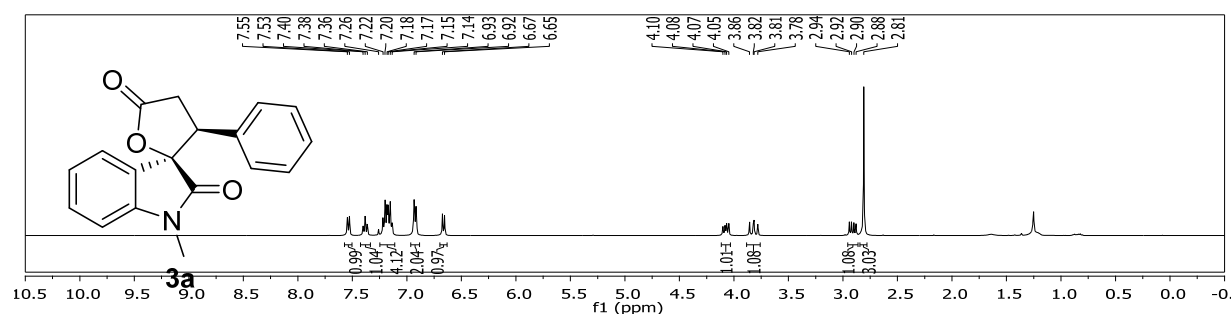

**<sup>1</sup>H-NMR of Crude Reaction Mixture under oxidative condition (Scheme 7 eq 7)**

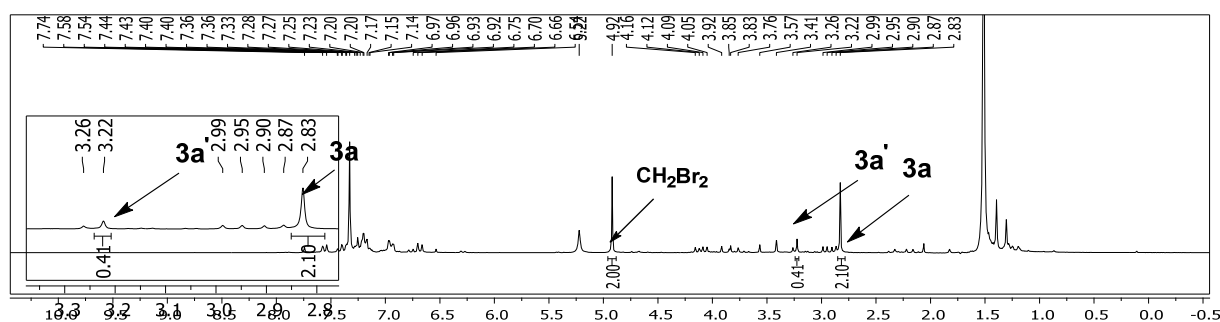

**<sup>1</sup>H-NMR of Crude Reaction Mixture under Homoenate condition (Scheme 7 eq 7)**

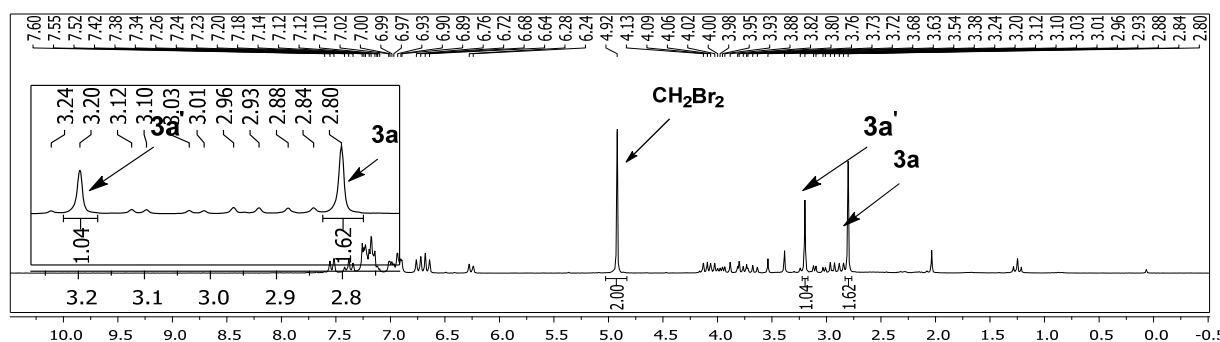

## HPLC data of spiro $\gamma$ -butyrolactone 3a under oxidative condition

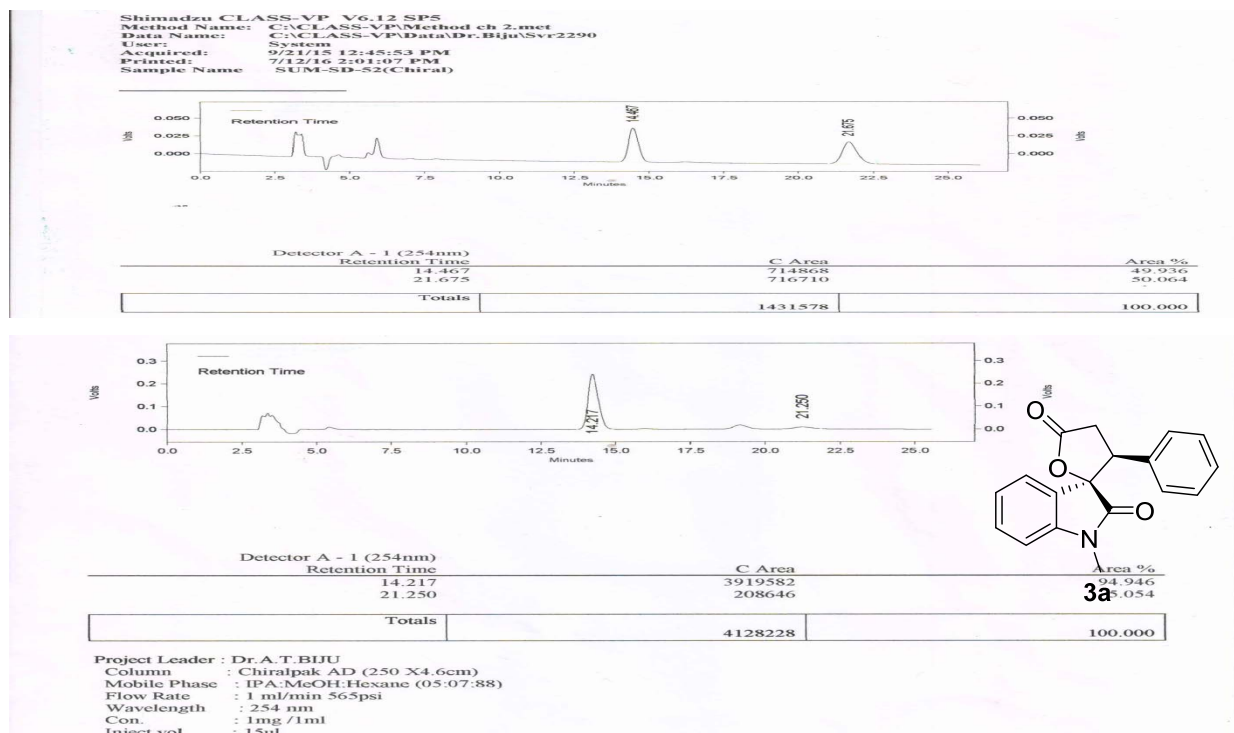

## HPLC data of spiro $\gamma$ -butyrolactone 3a under homoenolate condition

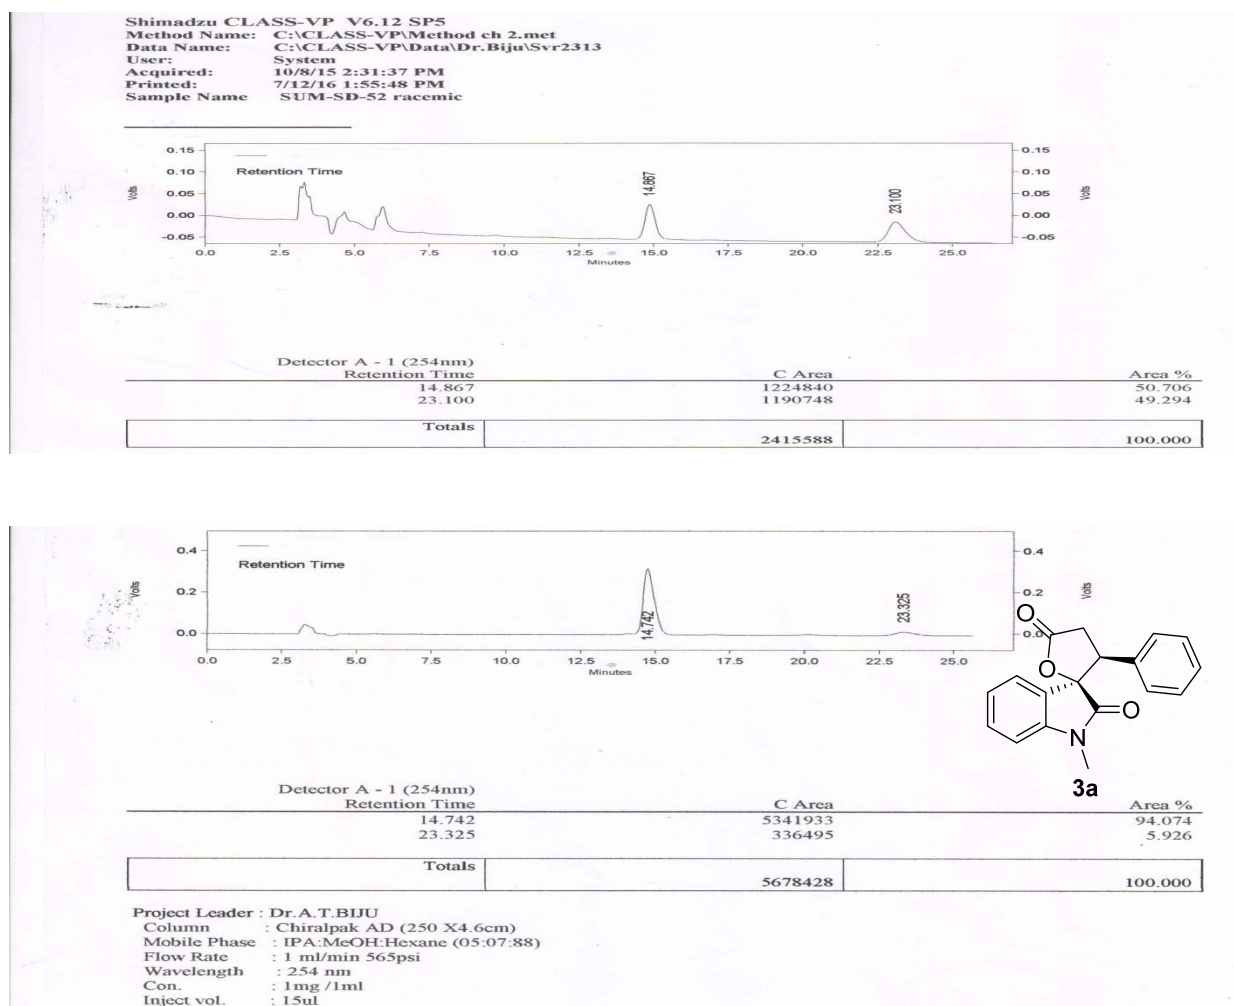

### Procedure for the oxidant-free degassed reaction

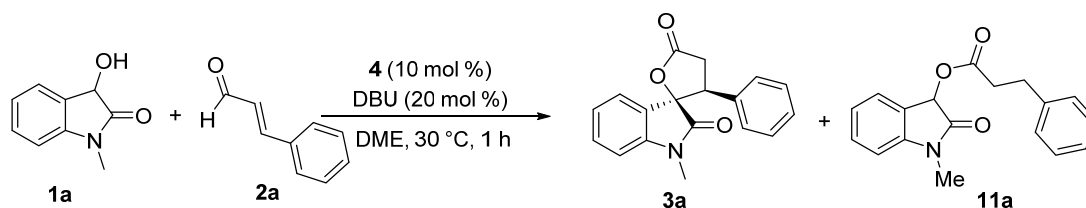

To a flame-dried screw-capped test tube equipped with a magnetic stir bar was added the triazolium salt **4** (0.009 g, 0.025 mmol) and dioxindole **1a** (0.25 mmol) and enal **2a** (0.25 mmol) was added. Then the screw-capped tube was evacuated and backfilled with argon. To this mixture was added DME (2.0 mL) under argon atmosphere. Then resultant reaction mixture was degassed three times and kept stirring at 30 °C. To this mixture DBU (0.008 gm, 7.5  $\mu$ L, 0.05 mmol) was successively added. After 12 h the reaction is quenched and the mixture was diluted with  $\text{CH}_2\text{Cl}_2$  (2.0 mL) and filtered through a short pad of silica gel and eluted with  $\text{CH}_2\text{Cl}_2$  (10 mL). The solvent was evaporated to obtain the crude product, which was analyzed using  $^1\text{H}$  NMR using  $\text{CH}_2\text{Br}_2$  (18.0  $\mu$ L, 0.25 mmol) as the internal standard.

### $^1\text{H}$ -NMR of (2*R*,3*S*)-1'-Methyl-3-phenyl-3,4-dihydro-5*H*-spiro[furan-2,3'-indoline]-2',5-dione (**3a**)

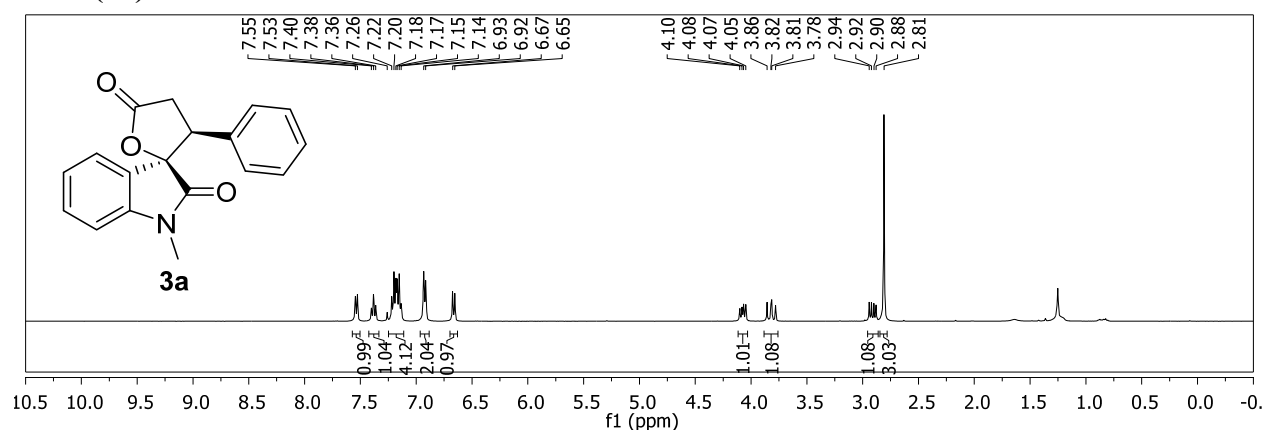

### $^1\text{H}$ -NMR of 1-methyl-2-oxoindolin-3-yl 3-phenylpropanoate (**11a**)

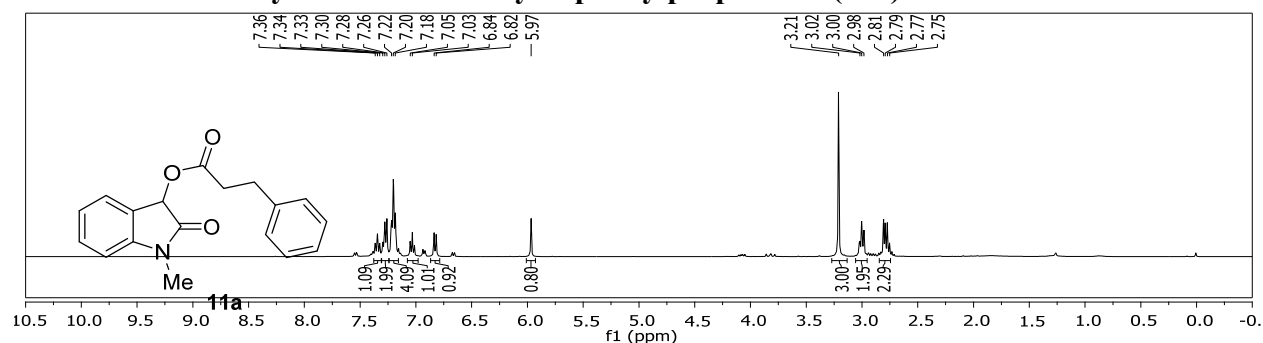

## <sup>1</sup>H-NMR of oxidant free degassed reaction mixture

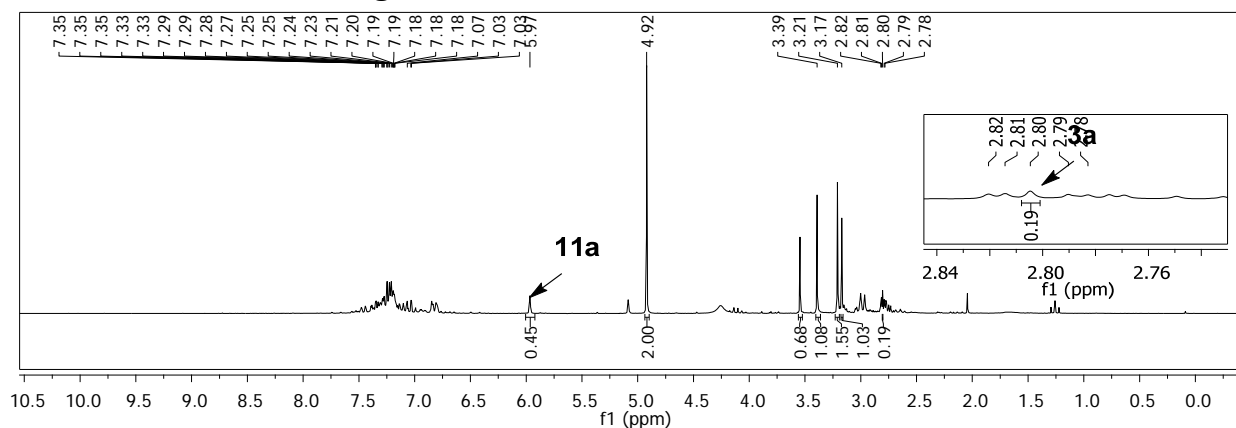

Under degassed condition, <10 % formation of annulated product **3a** indicates the involvement of dissolved oxygen in DME under present reaction condition, which is responsible for the oxidation of dioxindole to isatin.

## 7. Synthesis and Characterization of spiro $\gamma$ -butyrolactones

### (2*R*,3*S*)-1'-Methyl-3-phenyl-3,4-dihydro-5*H*-spiro[furan-2,3'-indoline]-2',5-dione (**3a**)<sup>7</sup>

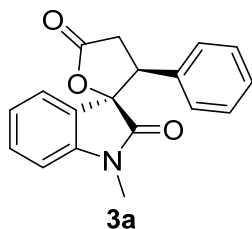

Following the general procedure, treatment of 3-hydroxy-1-methylindolin-2-one **1a** (41.0 mg, 0.25 mmol) and *trans* cinnamaldehyde **2a** (33.0 mg, 32  $\mu$ L, 0.25 mmol) with triazolium salt **4** (9.2 mg, 0.025 mmol), oxidant **5** (102.0 mg, 0.25 mmol), LiCl (5.2 mg, 0.125 mmol), and DBU (7.6 mg, 7.5  $\mu$ L, 0.05 mmol) in DME (2.0 mL) at 30 °C for 12 h followed by column chromatography afforded (2*R*,3*S*)-1'-methyl-3-phenyl-3,4-dihydro-5*H*-spiro[furan-2,3'-indoline]-2',5-dione **3a** as a white solid (60.0 mg, 82% yield, *dr* 4:1).

$R_f$  (Pet. ether /EtOAc = 70/30): 0.47; 95:5 *er*,  $[\alpha]_D^{25} = -51.90$  (c 0.1, CHCl<sub>3</sub>). HPLC (Chiralpak AD-H, 88:7:5 PE /MeOH/ IPA, 1.0 mL/min.) Major: 11.4 min, Minor: 16.0 min. <sup>1</sup>H NMR (400 MHz, CDCl<sub>3</sub>)  $\delta$  7.54 (d,  $J = 7.4$  Hz, 1H, H<sub>ar</sub>), 7.38 (t,  $J = 7.8$  Hz, 1H, H<sub>ar</sub>), 7.22-7.14 (m, 4H, H<sub>ar</sub>), 6.92 (d,  $J = 7.4$  Hz, 2H), 6.66 (d,  $J = 7.8$  Hz, 1H), 4.07 (dd,  $J = 13.7$ , 7.9 Hz, 1H), 3.82 (dd,  $J = 16.7$ , 13.8 Hz, 1H), 2.91 (dd,  $J = 16.8$ , 7.9 Hz, 1H), 2.82 (s, 3H). <sup>13</sup>C NMR (100 MHz, CDCl<sub>3</sub>)  $\delta$  175.0, 172.7, 144.4, 132.2, 131.4, 128.6, 128.4, 127.7, 124.8, 124.3, 123.6, 108.7, 86.6, 51.1, 32.3, 25.9. HRMS calculated  $[M+Na]^+$  for C<sub>18</sub>H<sub>15</sub>NO<sub>3</sub>Na:

<sup>7</sup> For the racemic synthesis, see: V. Nair, S. Vellalath, M. Poonoth, R. Mohan and E. Suresh, *Org. Lett.*, 2006, **8**, 507.

316.0944, found: 316.0942. **FTIR** ( $\text{cm}^{-1}$ ) 2930, 2940, 1796, 1613, 1482, 1425, 1319, 1287, 1216, 1110, 1036, 769.

**(2*R*,3*S*)-3-(4-Methoxyphenyl)-1'-methyl-3,4-dihydro-5*H*-spiro[furan-2,3'-indoline]-2',5-dione (3b)**<sup>7</sup>

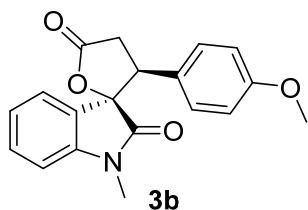

Following the general procedure, treatment of 3-hydroxy-1-methylindolin-2-one **1a** (41.0 mg, 0.25 mmol) and (*E*)-3-(4-methoxyphenyl)acrylaldehyde **2b** (41.0 mg, 0.25 mmol) with triazolium salt **4** (9.2 mg, 0.025 mmol), oxidant **5** (102.0 mg, 0.25 mmol), LiCl (5.2 mg, 0.125 mmol), and DBU (7.6 mg, 7.5  $\mu\text{L}$ , 0.05 mmol) in DME (2.0 mL) at 30 °C for 12 h followed by column chromatography afforded (*2R,3S*)-1'-methyl-3-phenyl-3,4-dihydro-5*H*-spiro[furan-2,3'-indoline]-2',5-dione **3b** as a wellow solid (64.0 mg, 78% yield, *dr* 6:1).

$R_f$  (Pet. ether /EtOAc = 70/30): 0.32; 90:10 er,  $[\alpha]_D^{25} = -165.0$  (c 0.1,  $\text{CHCl}_3$ ). **HPLC** (Chiralpak AD-H, 88:7:5 PE /MeOH/ IPA, 1.0 mL/min.) Major: 15.5 min, Minor: 19.2 min.  **$^1\text{H}$  NMR (400 MHz,  $\text{CDCl}_3$ )**  $\delta$  7.54 (d,  $J = 7.4$  Hz, 1H,  $H_{\text{ar}}$ ), 7.39 (t,  $J = 7.8$  Hz, 1H,  $H_{\text{ar}}$ ), 7.20 (t,  $J = 15.0$  Hz, 1H,  $H_{\text{ar}}$ ), 6.86 (d,  $J = 8.6$  Hz, 2H), 6.69 (d,  $J = 7.4$  Hz, 3H), 4.05 (dd,  $J = 13.7, 8.0$  Hz, 1H), 3.80-3.72 (m, 4H), 2.92-2.84 (m, 4H).  **$^{13}\text{C}$  NMR (100 MHz,  $\text{CDCl}_3$ )**  $\delta$  175.0, 172.8, 159.4, 144.3, 131.3, 128.7, 124.8, 124.2, 123.9, 123.5, 113.8, 108.7, 86.5, 55.2, 50.3, 32.5. **HRMS** calculated  $[\text{M}+\text{Na}]^+$  for  $\text{C}_{19}\text{H}_{17}\text{NO}_4\text{Na}$ : 346.1050, found: 346.1051. **FTIR** ( $\text{cm}^{-1}$ ) 2952, 1794, 1726, 1615, 1510, 1469, 1369, 1301, 1249, 1215, 1105, 1036.

**(2*R*,3*S*)-1'-Methyl-3-(*p*-tolyl)-3,4-dihydro-5*H*-spiro[furan-2,3'-indoline]-2',5-dione (3c)**

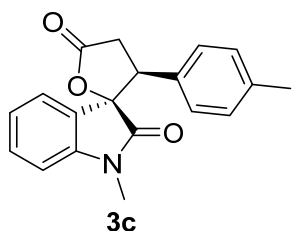

Following the general procedure, treatment of 3-hydroxy-1-methylindolin-2-one **1a** (41.0 mg, 0.25 mmol) and (*E*)-3-(*p*-tolyl)acrylaldehyde **2c** (36.0 mg, 0.25 mmol) with triazolium salt **4** (9.2 mg, 0.025 mmol), oxidant **5** (102.0 mg, 0.25 mmol), LiCl (5.2 mg, 0.125 mmol), and DBU (7.6 mg, 7.5  $\mu\text{L}$ , 0.05 mmol) in DME (2.0 mL) at 30 °C for 12 h followed by column chromatography afforded (*2R,3S*)-1'-methyl-3-phenyl-3,4-dihydro-5*H*-spiro[furan-2,3'-indoline]-2',5-dione **3c** as a white solid (63.0 mg, 73% yield, *dr* 2:1).

$R_f$  (Pet. ether /EtOAc = 70/30): 0.37; 91:9 er,  $[\alpha]_D^{25} = -82.0$  (c 0.1,  $\text{CHCl}_3$ ). **HPLC** (Chiralpak AD-H, 88:7:5 PE /MeOH/ IPA, 1.0 mL/min.) Major: 12.2 min, Minor: 17.2 min.

**<sup>1</sup>H NMR (400 MHz, CDCl<sub>3</sub>)** δ 7.63 (d, *J* = 7.2 Hz, 1H, H<sub>ar</sub>), 7.48 (t, *J* = 7.7 Hz, 1H, H<sub>ar</sub>), 7.30 (t, *J* = 7.5 Hz, 1H, H<sub>ar</sub>), 7.06 (d, *J* = 7.8 Hz, 2H), 6.92 (d, *J* = 7.9 Hz, 2H), 6.78 (d, *J* = 8.0 Hz, 1H), 4.15 (dd, *J* = 13.7, 8.0 Hz, 1H), 3.89 (dd, *J* = 16.5, 14.0 Hz, 1H), 3.02-2.94 (m, 4H), 2.34 (s, 3H). **<sup>13</sup>C NMR (100 MHz, CDCl<sub>3</sub>)** δ 175.1, 172.8, 144.4, 138.1, 131.3, 129.2, 129.1, 127.5, 124.9, 124.2, 123.6, 108.7, 86.5, 50.7, 34.5, 32.5, 30.4, 26.0, 21.1, 14.3. **HRMS** calculated [M+Na]<sup>+</sup> for C<sub>19</sub>H<sub>17</sub>NO<sub>3</sub>Na: 330.1101, found: 330.1093. **FTIR (cm<sup>-1</sup>)** 3020, 1794, 1727, 1617, 1515, 1495, 1472, 1423, 1353, 1215, 1165, 1108, 928, 774, 504.

**(2*R*,3*S*)-3-(4-Fluorophenyl)-1'-methyl-3,4-dihydro-5*H*-spiro[furan-2,3'-indoline]-2',5-dione (3d)**

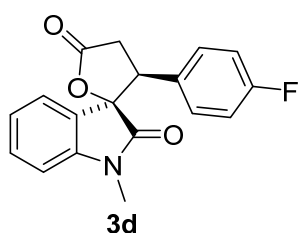

Following the general procedure, treatment of 3-hydroxy-1-methylindolin-2-one **1a** (41.0 mg, 0.25 mmol) and (*E*)-3-(4-fluorophenyl)acrylaldehyde **2d** (38.0 mg, 0.25 mmol) with triazolium salt **4** (9.2 mg, 0.025 mmol), oxidant **5** (102.0 mg, 0.25 mmol), LiCl (5.2 mg, 0.125 mmol), and DBU (7.6 mg, 7.5 μL, 0.05 mmol) in DME (2.0 mL) at 30 °C for 12 h followed by column chromatography afforded (2*R*,3*S*)-3-(4-fluorophenyl)-1'-methyl-3,4-dihydro-5*H*-spiro[furan-2,3'-indoline]-2',5-dione **3d** as a white solid (56.0 mg, 72% yield, *dr* 4:1).

**R<sub>f</sub>** (Pet. ether /EtOAc = 70/30): 0.40; 92:8 er, [α]<sub>D</sub><sup>25</sup> = -90.0 (c 0.1, CHCl<sub>3</sub>). **HPLC** (Chiralpak AD, 88:7:5 PE /MeOH/ IPA, 1.0 mL/min.) Major: 13.4 min, Minor: 24.0 min. **<sup>1</sup>H NMR (400 MHz, CDCl<sub>3</sub>)** δ 7.52 (d, *J* = 7.3 Hz, 1H, H<sub>ar</sub>), 7.38 (t, *J* = 7.7 Hz, 1H, H<sub>ar</sub>), 7.19 (t, *J* = 7.5 Hz, 1H, H<sub>ar</sub>), 6.92-6.81 (m, 4H, H<sub>ar</sub>), 6.68 (d, *J* = 7.9 Hz, 1H, H<sub>ar</sub>), 4.05 (dd, *J*<sub>1</sub> = 8.2 Hz, *J*<sub>2</sub> = 13.6 Hz, 1H), 3.78-3.70 (m, 1H), 2.90 (dd, *J*<sub>1</sub> = 8.1 Hz, *J*<sub>2</sub> = 16.6 Hz, 1H), 2.83 (s, 3H). **<sup>13</sup>C NMR (100 MHz, CDCl<sub>3</sub>)** δ 174.6, 172.6, 165.6 (d, *J* = 247.8 Hz), 144.3, 131.5, 129.4 (d, *J* = 8.2 Hz), 127.9 (d, *J* = 2.9 Hz), 124.5, 124.2, 123.7, 115.5 (d, *J* = 21.4 Hz), 108.8, 86.4, 50.3, 32.5, 25.9. **<sup>19</sup>F NMR (376 MHz, CDCl<sub>3</sub>)** δ -113.45. **HRMS** calculated [M+Na]<sup>+</sup> for C<sub>18</sub>H<sub>14</sub>NO<sub>3</sub>FNa: 334.0850, found: 334.0843. **FTIR (cm<sup>-1</sup>)** 3020, 2400, 2361, 1796, 1727, 1618, 1495, 1472, 1377, 1111. 1005, 771, 669, 495, 417.

**Methyl 4-((2*R*,3*R*)-1'-methyl-2',5-dioxo-4,5-dihydro-3*H*-spiro[furan-2,3'-indolin]-3-yl)benzoate (3e)**

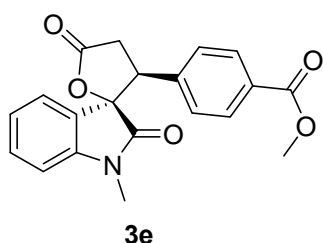

Following the general procedure, treatment of 3-hydroxy-1-methylindolin-2-one **1a** (41.0 mg, 0.25 mmol) and methyl (*E*)-4-

(3-oxoprop-1-en-1-yl)benzoate **2e** (48.0 mg, 0.25 mmol) with triazolium salt **4** (9.2 mg, 0.025 mmol), oxidant **5** (102.0 mg, 0.25 mmol), LiCl (5.2 mg, 0.125 mmol), and DBU (7.6 mg, 7.5  $\mu$ L, 0.05 mmol) in DME (2.0 mL) at 30 °C for 12 h followed by column chromatography afforded Methyl 4-((2*R*,3*S*)-1'-methyl-2',5-dioxo-4,5-dihydro-3*H*-spiro[furan-2,3'-indolin]-3-yl)benzoate **3e** as a white solid (72.0 mg, 82% yield, *dr* 4:1).

$R_f$  (Pet. ether /EtOAc = 70/30): 0.34; 96:4 er,  $[\alpha]_D^{25} = -25.0$  (c 0.1, CHCl<sub>3</sub>). HPLC (Chiralpak AD-H, 88:7:5 PE /MeOH/ IPA, 1.0 mL/min.) Major: 30.4 min, Minor: 36.0 min. <sup>1</sup>H NMR (400 MHz, CDCl<sub>3</sub>)  $\delta$  7.80 (d,  $J = 8.2$  Hz, 2H), 7.54 (d,  $J = 7.4$  Hz, 1H), 7.37 (t,  $J = 7.7$  Hz, 1H), 7.19 (t,  $J = 7.5$  Hz, 1H), 6.98 (d,  $J = 8.2$  Hz, 2H), 6.66 (d,  $J = 7.8$  Hz, 1H), 4.13 (dd,  $J_1 = 13.5$  Hz,  $J_2 = 8.0$  Hz, 1H), 3.84 (s, 3H), 3.82 – 3.75 (m, 1H), 2.93 (dd,  $J_1 = 16.8$  Hz,  $J_2 = 8.0$  Hz, 1H), 2.78 (s, 3H). <sup>13</sup>C NMR (100 MHz, CDCl<sub>3</sub>)  $\delta$  174.5, 172.4, 166.6, 144.3, 137.4, 131.6, 130.2, 129.7, 127.8, 124.4, 124.3, 123.8, 108.9, 86.2, 52.3, 50.8, 32.2, 25.9. HRMS calculated  $[M+Na]^+$  for C<sub>20</sub>H<sub>17</sub>NO<sub>5</sub>Na: 374.0997, found: 374.0999. FTIR (cm<sup>-1</sup>) 2966, 2403, 1798, 1724, 1615, 1477, 1431, 1378, 1285, 1216, 1110.

**(2*R*,3*S*)-1'-Methyl-3-(4-(trifluoromethyl)phenyl)-3,4-dihydro-5*H*-spiro[furan-2,3'-indoline]-2',5-dione (**3f**)**

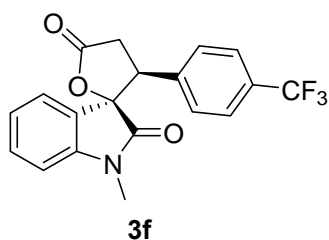

Following the general procedure, treatment of 3-hydroxy-1-methylindolin-2-one **1a** (41.0 mg, 0.25 mmol) and (*E*)-3-(4-(trifluoromethyl)phenyl)acrylaldehyde **2f** (50.0 mg, 0.25 mmol) with triazolium salt **4** (9.2 mg, 0.025 mmol), oxidant **5** (102.0 mg, 0.25 mmol), LiCl (5.2 mg, 0.125 mmol), and DBU (7.6 mg, 7.5  $\mu$ L, 0.05 mmol) in DME (2.0 mL) at 30 °C for 12 h followed by column chromatography afforded (2*S*,3*R*)-1'-methyl-3-(4-(trifluoromethyl)phenyl)-3,4-dihydro-5*H*-spiro[furan-2,3'-indoline]-2',5-dione **3f** as a yellow solid (75.0 mg, 82% yield, *dr* 4:1).

$R_f$  (Pet. ether /EtOAc = 70/30): 0.50; 94:6 er,  $[\alpha]_D^{25} = -80.0$  (c 0.1, CHCl<sub>3</sub>). HPLC (Chiralpak AD-H, 88:7:5 PE /MeOH/ IPA, 1.0 mL/min.) Major: 10.0 min, Minor: 14.3 min. <sup>1</sup>H NMR (400 MHz, CDCl<sub>3</sub>)  $\delta$  7.56 (d,  $J = 7.4$  Hz, 1H), 7.40 (m, 3H), 7.21 (t,  $J = 7.5$  Hz, 1H), 7.05 (d,  $J = 8.1$  Hz, 2H), 6.70 (d,  $J = 7.8$  Hz, 1H), 4.15 (dd,  $J_1 = 13.5$  Hz,  $J_2 = 8.0$  Hz, 1H), 3.80 (m, 1H), 2.95 (dd,  $J_1 = 16.8$  Hz,  $J_2 = 8.0$  Hz, 1H), 2.82 (s, 3H). <sup>13</sup>C NMR (100 MHz, CDCl<sub>3</sub>)  $\delta$  174.3, 172.4, 144.3, 136.5, 131.7, 128.2, 125.5, 125.5, 124.3, 124.3, 123.9, 109.0, 86.1, 50.5, 32.3, 26.0. HRMS calculated  $[M+Na]^+$  for C<sub>19</sub>H<sub>14</sub>NO<sub>3</sub>F<sub>3</sub>Na: 384.0821, found: 384.0818. FTIR (cm<sup>-1</sup>) 2405, 1799, 1726, 1616, 1479, 1423, 1367, 1324, 1212, 1172, 1022.

**(2*R*,3*S*)-1'-Methyl-3-(4-nitrophenyl)-3,4-dihydro-5*H*-spiro[furan-2,3'-indoline]-2',5-dione (3g)**

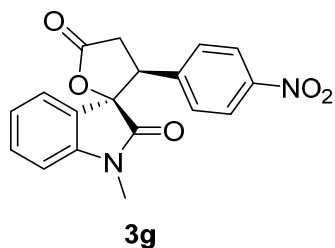

Following the general procedure, treatment of 3-hydroxy-1-methylindolin-2-one **1a** (41.0 mg, 0.25 mmol) and (*E*)-3-(4-nitrophenyl)acrylaldehyde **2g** (44.0 mg, 0.25 mmol) with triazolium salt **4** (9.2 mg, 0.025 mmol), oxidant **5** (102.0 mg, 0.25 mmol), LiCl (5.2 mg, 0.125 mmol), and DBU (7.6 mg, 7.5  $\mu$ L, 0.05 mmol) in DME (2.0 mL) at 30  $^{\circ}$ C for 12 h followed by column chromatography afforded methyl (2*S*,3*R*)-1'-Methyl-3-(4-nitrophenyl)-3,4-dihydro-5*H*-spiro[furan-2,3'-indoline]-2',5-dione **3g** as a white solid (61.0 mg, 72% yield, *dr* 4:1).

$R_f$  (Pet. ether /EtOAc = 70/30): 0.55; 99:1 er,  $[\alpha]_D^{25} = -66.0$  (c 0.1, CHCl<sub>3</sub>). **HPLC** (Chiralpak AD-H, 88:7:5 PE /MeOH/ IPA, 1.0 mL/min.) Major: 15.2 min, Minor: 33.6 min. **<sup>1</sup>H NMR (400 MHz, CDCl<sub>3</sub>)**  $\delta$  8.13 (d,  $J = 8.6$  Hz, 2H), 7.68 (d,  $J = 7.3$  Hz, 1H), 7.54 (t,  $J = 7.6$  Hz, 1H), 7.35 (m, 1H), 7.24 (d,  $J = 8.6$  Hz, 2H), 6.83 (d,  $J = 7.8$  Hz, 1H), 4.31 (dd,  $J_1 = 13.4$  Hz,  $J_2 = 8.0$  Hz, 1H), 3.94 (m, 1H), 3.11 (dd,  $J_1 = 16.8$  Hz,  $J_2 = 8.0$  Hz, 1H), 2.96 (s, 3H). **<sup>13</sup>C NMR (100 MHz, CDCl<sub>3</sub>)**  $\delta$  173.8, 172.2, 147.9, 144.3, 139.8, 132.0, 128.8, 124.4, 124.0, 124.0, 123.7, 109.1, 85.9, 50.5, 32.3, 26.1. **HRMS** calculated  $[M+Na]^+$  for C<sub>18</sub>H<sub>14</sub>N<sub>2</sub>O<sub>5</sub>Na: 361.0790, found: 361.0795. **FTIR (cm<sup>-1</sup>)** 2968, 2405, 1800, 1736, 1612, 1525, 1474, 1359, 1216, 1103, 1037.

**(2*R*,3*S*)-3-(2-Methoxyphenyl)-1'-methyl-3,4-dihydro-5*H*-spiro[furan-2,3'-indoline]-2',5-dione (3h)**

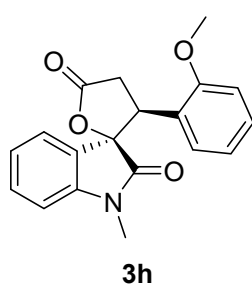

Following the general procedure, treatment of 3-hydroxy-1-methylindolin-2-one **1a** (41.0 mg, 0.25 mmol) and (*E*)-3-(2-methoxyphenyl)acrylaldehyde **2h** (40.0 mg, 0.25 mmol) with triazolium salt **4** (9.2 mg, 0.025 mmol), oxidant **5** (102.0 mg, 0.25 mmol), LiCl (5.2 mg, 0.125 mmol), and DBU (7.6 mg, 7.5  $\mu$ L, 0.05 mmol) in DME (2.0 mL) at 30  $^{\circ}$ C for 12 h followed by column chromatography afforded (2*R*,3*S*)-3-(2-methoxyphenyl)-1'-methyl-3,4-dihydro-5*H*-spiro[furan-2,3'-indoline]-2',5-dione **3h** as a yellow solid (64.0 mg, 79% yield, *dr* 2:1).

$R_f$  (Pet. ether /EtOAc = 70/30): 0.48; 95:5 er,  $[\alpha]_D^{25} = -144.0$  (c 0.1, CHCl<sub>3</sub>). **HPLC** (Chiralpak AD, 90:5:5 PE /MeOH/ IPA, 1.0 mL/min.) Major: 19.4 min, Minor: 22.3 min. **<sup>1</sup>H NMR (400 MHz, CDCl<sub>3</sub>)**  $\delta$  7.54 (d,  $J = 7.4$  Hz, 1H), 7.42 (d,  $J = 7.7$  Hz, 1H), 7.31 (t,  $J = 7.8$



Hz, 1H), 7.21 – 7.12 (m, 2H), 6.90 (t,  $J = 7.5$  Hz, 1H), 6.63 (dd,  $J_1 = 7.8$  Hz,  $J_2 = 4.2$  Hz, 2H), 4.78 (dd,  $J_1 = 13.8$  Hz,  $J_2 = 8.3$  Hz, 1H), 3.74 (dd,  $J_1 = 16.8$  Hz,  $J_2 = 4.0$  Hz, 1H), 3.27 (s, 3H), 2.93 – 2.76 (m, 4H).  $^{13}\text{C}$  NMR (100 MHz,  $\text{CDCl}_3$ )  $\delta$  175.4, 173.2, 157.5, 144.0, 130.7, 129.2, 127.9, 125.1, 122.9, 120.6, 120.5, 110.4, 108.2, 86.5, 54.8, 42.2, 32.8, 25.9. HRMS calculated  $[\text{M}+\text{Na}]^+$  for  $\text{C}_{19}\text{H}_{17}\text{NO}_4\text{Na}$ : 346.1048, found: 346.1050. FTIR ( $\text{cm}^{-1}$ ) 2496, 2405, 1792, 1725, 1614, 1481, 1426, 1366, 1296, 1212, 1106, 1388, 1036.

**(2*R*,3*S*)-3-(2-Fluorophenyl)-1'-methyl-3,4-dihydro-5*H*-spiro[furan-2,3'-indoline]-2',5-dione (3i)**

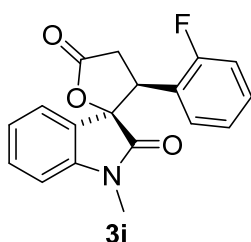

Following the general procedure, treatment of 3-hydroxy-1-methylindolin-2-one **1a** (41.0 mg, 0.25 mmol) and (*E*)-3-(2-fluorophenyl)acrylaldehyde **2i** (38.0 mg, 0.25 mmol) with triazolium salt **4** (9.2 mg, 0.025 mmol), oxidant **5** (102.0 mg, 0.25 mmol), LiCl (5.2 mg, 0.125 mmol), and DBU (7.6 mg, 7.5  $\mu\text{L}$ , 0.05 mmol) in DME (2.0 mL) at 30  $^\circ\text{C}$  for 12 h followed by column chromatography afforded (2*R*,3*S*)-3-(2-fluorophenyl)-1'-methyl-3,4-dihydro-5*H*-spiro[furan-2,3'-indoline]-2',5-dione as a white solid (69.0 mg, 88% yield, *dr* 4:1).

$R_f$  (Pet. ether /EtOAc = 70/30): 0.42; 97:3 er,  $[\alpha]_D^{25} = -82.9$  (c 0.1,  $\text{CHCl}_3$ ). HPLC (Chiralpak AD-H, 90:5:5 PE /MeOH/ IPA, 1.0 mL/min.) Major: 16.6 min, Minor: 24.7 min.  $^1\text{H}$  NMR (400 MHz,  $\text{CDCl}_3$ )  $\delta$  7.53 (d,  $J = 7.4$  Hz, 1H,  $H_{\text{ar}}$ ), 7.47 (t,  $J = 7.5$  Hz, 1H,  $H_{\text{ar}}$ ), 7.34 (t,  $J = 7.6$  Hz, 1H,  $H_{\text{ar}}$ ), 7.20-7.14 (m, 2H,  $H_{\text{ar}}$ ), 7.08 (t,  $J = 7.6$  Hz, 1H,  $H_{\text{ar}}$ ), 6.80 (t,  $J = 9.4$  Hz, 1H,  $H_{\text{ar}}$ ), 6.65 (d,  $J = 7.8$  Hz, 1H,  $H_{\text{ar}}$ ), 4.51 (dd,  $J_1 = 8.3$  Hz,  $J_2 = 13.6$  Hz, 1H), 3.80-3.72 (m, 1H), 2.94-2.88 (m, 4H).  $^{13}\text{C}$  NMR (100 MHz,  $\text{CDCl}_3$ )  $\delta$  174.6, 172.9, 161.0 (d,  $J = 248.7$  Hz), 144.0, 131.4, 129.9 (d,  $J = 8.5$  Hz), 128.8 (d,  $J = 2.7$  Hz), 124.9, 124.3 (d,  $J = 3.5$  Hz), 124.1, 123.6, 122.7, 119.6 (d,  $J = 13.3$  Hz), 115.5 (d,  $J = 22.7$  Hz), 108.6, 86.1, 42.3, 33.0, 26.0. HRMS calculated  $[\text{M}+\text{Na}]^+$  for  $\text{C}_{18}\text{H}_{14}\text{NO}_3\text{FN}$ : 334.0850, found: 334.0843. FTIR ( $\text{cm}^{-1}$ ) 3020, 1797, 1727, 1617, 1472, 1215, 1165, 1039, 929, 820, 669, 499.

**(2*R*,3*S*)-3-(Furan-2-yl)-1'-methyl-3,4-dihydro-5*H*-spiro[furan-2,3'-indoline]-2',5-dione (3j)**

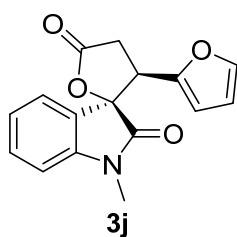

Following the general procedure, treatment of 3-hydroxy-1-methylindolin-2-one **1a** (41.0 mg, 0.25 mmol) and (*E*)-3-(furan-2-yl)acrylaldehyde **2j** (31.0 mg, 0.25 mmol) with triazolium salt **4** (9.2

mg, 0.025 mmol), oxidant **5** (102.0 mg, 0.25 mmol), LiCl (5.2 mg, 0.125 mmol), and DBU (7.6 mg, 7.5  $\mu$ L, 0.05 mmol) in DME (2.0 mL) at 30 °C for 12 h followed by column chromatography afforded (2*S*,3*R*)-1'-methyl-3-phenyl-3,4-dihydro-5*H*-spiro[furan-2,3'-indoline]-2',5-dione **3j** as a yellow solid (48.0 mg, 67% yield, *dr* 3:1).

$R_f$  (Pet. ether /EtOAc = 70/30): 0.39 94:6 er,  $[\alpha]_D^{25} = -31.0$  (c 0.1, CHCl<sub>3</sub>). HPLC (Chiralpak AD-H, 88:7:5 PE /MeOH/ IPA, 1.0 mL/min.) Major: 13.3 min, Minor: 27.8 min. <sup>1</sup>H NMR (400 MHz, CDCl<sub>3</sub>)  $\delta$  7.44 (d,  $J = 7.3$  Hz, 1H, H<sub>ar</sub>), 7.40 (t,  $J = 15.9$  Hz, 1H, H<sub>ar</sub>), 7.19-7.15 (m, 2H, H<sub>ar</sub>), 6.78 (d,  $J = 7.8$  Hz, 1H), 6.21 (d,  $J = 1.7$  Hz, 1H), 6.01 (d,  $J = 3.0$  Hz, 1H), 4.14 (dd,  $J_1 = 13.2$  Hz,  $J_2 = 8.4$  Hz, 1H), 3.68 (dd,  $J_1 = 16.9$  Hz,  $J_2 = 13.4$  Hz, 1H), 3.00-2.94 (m, 4H). <sup>13</sup>C NMR (100 MHz, CDCl<sub>3</sub>)  $\delta$  174.2, 172.5, 147.8, 144.5, 142.6, 131.5, 129.2, 124.8, 124.3, 123.6, 110.6, 108.8, 107.9, 84.7, 44.7, 32.3, 26.2, 18.0. HRMS calculated  $[M+Na]^+$  for C<sub>16</sub>H<sub>13</sub>NO<sub>4</sub>Na: 306.0737, found: 306.0738. FTIR (cm<sup>-1</sup>) 2404, 1799, 1730, 1615, 1480, 1421, 1372, 1214, 1104, 1010, 930.

**(2*R*,3*S*)-1'-Benzyl-3-phenyl-3,4-dihydro-5*H*-spiro[furan-2,3'-indoline]-2',5-dione (**3k**)<sup>8</sup>**

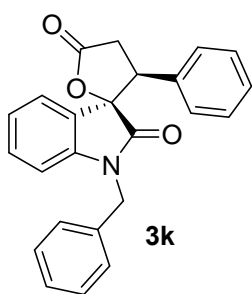

Following the general procedure, treatment of 1-benzyl-3-hydroxyindolin-2-one **1k** (60.0 mg, 0.25 mmol) and *trans* cinnamaldehyde **2a** (33.0 mg, 32  $\mu$ L, 0.25 mmol) with triazolium salt **4** (9.2 mg, 0.025 mmol), oxidant **5** (102.0 mg, 0.25 mmol), LiCl (5.2 mg, 0.125 mmol), and DBU (7.6 mg, 7.5  $\mu$ L, 0.05 mmol) in DME (2.0 mL) at 30 °C for 12 h followed by column chromatography afforded (2*R*,3*S*)-1'-benzyl-3-phenyl-3,4-dihydro-5*H*-spiro[furan-2,3'-indoline]-2',5-dione **3k** as a white solid (70.0 mg, 76% yield, *dr* 3:1).

$R_f$  (Pet. ether /EtOAc = 70/30): 0.48; 90:10 er,  $[\alpha]_D^{25} = -41.0$  (c 0.1, CHCl<sub>3</sub>). HPLC (Chiralpak AD-H, 88:7:5 PE /MeOH/ IPA, 1.0 mL/min.) Major: 22.6 min, Minor: 25.7 min. <sup>1</sup>H NMR (400 MHz, CDCl<sub>3</sub>)  $\delta$  7.57 (d,  $J = 7.4$  Hz, 1H, H<sub>ar</sub>), 7.34-7.29 (m, 2H, H<sub>ar</sub>), 7.34-7.29 (m, 2H, H<sub>ar</sub>), 7.26-7.14 (m, 7H, H<sub>ar</sub>), 7.08 (t,  $J = 7.6$  Hz, 2H), 7.02 (d,  $J = 7.62$  Hz, 2H, H<sub>ar</sub>), 6.46-6.42 (m, 3H), 5.03-4.94 (m, 1H), 4.24-4.15 (m, 1H), 3.92 (dd,  $J_1 = 16.8$  Hz,  $J_2 = 13.8$  Hz, 1H), 2.96 (dd,  $J_1 = 16.8$  Hz,  $J_2 = 8.0$  Hz, 1H). <sup>13</sup>C NMR (100 MHz, CDCl<sub>3</sub>)  $\delta$  174.9, 172.9, 143.8, 134.5, 132.1, 131.4, 129.1, 129.0, 128.8, 128.2, 127.5, 126.5, 124.4, 123.7, 110.1, 86.5, 50.9, 43.8, 32.4, 25.9. Representative Peaks of Minor Isomer: <sup>1</sup>H NMR  $\delta$  6.73 (t,  $J = 7.6$  Hz), 6.63 (d,  $J = 7.9$  Hz), 4.81 (d,  $J = 15.8$  Hz), 4.09 (dd,  $J_1 = 8.6$  Hz,  $J_2 = 5.9$

<sup>8</sup> L. H. Sun, L. T. Shen and S. Ye, *Chem. Commun.*, 2011, **47**, 10136.

Hz), 3.67 (dd,  $J_1 = 17.5$  Hz,  $J_2 = 8.6$  Hz), 3.16 (dd,  $J_1 = 17.5$  Hz,  $J_2 = 5.9$  Hz).  $^{13}\text{C}$  NMR  $\delta$  130.86, 128.36, 127.31, 126.10, 124.75, 122.87, 109.74, 48.40, 44.15, 34.17. HRMS calculated  $[\text{M}+\text{Na}]^+$  for  $\text{C}_{24}\text{H}_{19}\text{NO}_3\text{Na}$ : 392.1255, found: 392.1257. FTIR ( $\text{cm}^{-1}$ ) 2403, 1784, 1613, 1482, 1425, 1369, 1215, 1037, 924, 769, 671.

**(2*R*,3*S*)-1'-Allyl-3-phenyl-3,4-dihydro-5*H*-spiro[furan-2,3'-indoline]-2',5-dione (3l)**

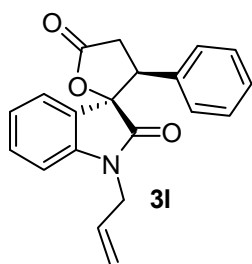

Following the general procedure, treatment of 1-allyl-3-hydroxyindolin-2-one **1l** (47.0 mg, 0.25 mmol) and *trans* cinnamaldehyde **2a** (33.0 mg, 32  $\mu\text{L}$ , 0.25 mmol) with triazolium salt **4** (9.2 mg, 0.025 mmol), oxidant **5** (102.0 mg, 0.25 mmol), LiCl (5.2 mg, 0.125 mmol), and DBU (7.6 mg, 7.5  $\mu\text{L}$ , 0.05 mmol) in DME (2.0 mL) at 30  $^\circ\text{C}$  for 12 h followed by column chromatography afforded (2*R*,3*S*)-1'-allyl-3-phenyl-3,4-dihydro-5*H*-spiro[furan-2,3'-indoline]-2',5-dione **3l** as a white solid (51.0 mg, 63% yield, *dr* 7:1).

$R_f$  (Pet. ether /EtOAc = 70/30): 0.55; 93:7 er,  $[\alpha]_{\text{D}}^{25} = -45.0$  (c 0.1,  $\text{CHCl}_3$ ). HPLC (Chiralpak AD-H, 88:7:5 PE /MeOH/ IPA, 1.0 mL/min.) Major: 13.5 min, Minor: 23.0 min.  $^1\text{H}$  NMR (400 MHz,  $\text{CDCl}_3$ )  $\delta$  7.55 (d,  $J = 7.5$  Hz, 1H,  $\text{H}_{\text{ar}}$ ), 7.34 (t,  $J = 7.8$  Hz, 1H,  $\text{H}_{\text{ar}}$ ), 7.24-7.14 (m, 4H,  $\text{H}_{\text{ar}}$ ), 6.94 (d,  $J = 7.3$  Hz, 2H), 6.63 (d,  $J = 7.9$  Hz, 1H), 5.24 – 5.17 (m, 1H), 4.82 (d,  $J = 10.5$  Hz, 1H), 4.36 (d,  $J = 17.1$  Hz, 1H), 4.29 – 4.19 (m, 1H), 4.10 (dd,  $J_1 = 13.7$  Hz,  $J_2 = 7.9$  Hz, 1H), 3.84 (dd,  $J_1 = 16.7$  Hz,  $J_2 = 13.8$  Hz, 1H), 3.71 (dd,  $J_1 = 16.6$  Hz,  $J_2 = 5.3$  Hz, 1H), 2.92 (dd,  $J_1 = 16.8$  Hz,  $J_2 = 7.9$  Hz, 1H).  $^{13}\text{C}$  NMR (100 MHz,  $\text{CDCl}_3$ )  $\delta$  175.0, 172.4, 156.7, 137.6, 132.2, 128.5, 127.6, 125.9, 115.9, 111.2, 109.3, 86.8, 56.0, 51.1, 32.2, 25.9. HRMS calculated  $[\text{M}+\text{Na}]^+$  for  $\text{C}_{20}\text{H}_{17}\text{NO}_3\text{Na}$ : 342.1101, found: 342.1098. FTIR ( $\text{cm}^{-1}$ ) 2403, 1795, 1728, 1614, 1476, 1426, 1372, 1215, 1116, 1040, 926, 767.

**(2*R*,3*S*)-3-Phenyl-1'-(prop-2-yn-1-yl)-3,4-dihydro-5*H*-spiro[furan-2,3'-indoline]-2',5-dione (3m)<sup>7</sup>**

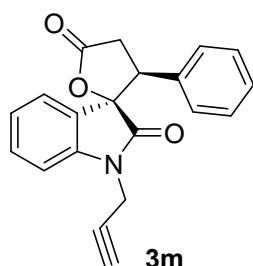

Following the general procedure, treatment of 3-hydroxy-1-(prop-2-yn-1-yl)indolin-2-one **1m** (47.0 mg, 0.25 mmol) and *trans* cinnamaldehyde **2a** (33.0 mg, 32  $\mu\text{L}$ , 0.25 mmol) with triazolium salt **4** (9.2 mg, 0.025 mmol), oxidant **5** (102.0 mg, 0.25 mmol), LiCl (5.2 mg, 0.125 mmol), and DBU (7.6 mg, 7.5  $\mu\text{L}$ , 0.05 mmol) in DME

(2.0 mL) at 30 °C for 12 h followed by column chromatography afforded (2*R*,3*S*)-3-phenyl-1'-(prop-2-yn-1-yl)-3,4-dihydro-5*H*-spiro[furan-2,3'-indoline]-2',5-dione **3m** as a yellow solid (64.0 mg, 80% yield, *dr* 2:1).

*R<sub>f</sub>* (Pet. ether /EtOAc = 70/30): 0.52; 94:6 er,  $[\alpha]_{\text{D}}^{25} = -38.0$  (c=0.1, CHCl<sub>3</sub>). **HPLC** (Chiralpak AD-H, 88:7:5 PE /MeOH/ IPA, 1.0 mL/min.) Major: 16.3 min, Minor: 42.5 min. **<sup>1</sup>H NMR (400 MHz, CDCl<sub>3</sub>)** δ 7.58 (d, *J* = 7.5 Hz, 1H, H<sub>ar</sub>), 7.43 (t, *J* = 7.7 Hz, 1H, H<sub>ar</sub>), 7.28-7.15 (m, 7H, H<sub>ar</sub>), 4.19-4.01 (m, 3H), 3.86-3.78(m, 1H), 2.95 (dd, *J*<sub>1</sub> = 16.77 Hz, *J*<sub>2</sub> = 7.95 Hz, 1H), 2.01 (bs, 1H). **<sup>13</sup>C NMR (100 MHz, CDCl<sub>3</sub>)** δ 174.8, 171.8, 142.5, 136.7, 131.4, 128.7, 128.8, 128.7, 127.6, 126.2, 124.4, 124.0, 109.8, 86.6, 76.1, 72.4, 51.3, 32.1, 29.0. Representative Peaks of Minor Isomer: **<sup>1</sup>H NMR (400 MHz, CDCl<sub>3</sub>)** δ 7.31 – 7.12 (m, 2H), 6.90 (t, *J* = 8.0 Hz, 9H), 6.78 (t, *J* = 7.6 Hz, 1H), 6.33 (d, *J* = 7.5 Hz, 1H), 4.63 (dd, *J*<sub>1</sub> = 17.7 Hz, *J*<sub>2</sub> = 2.3 Hz, 1H), 4.39 (dd, *J* = 17.7 Hz, *J*<sub>2</sub> = 2.3 Hz, 1H), 3.68 (dd, *J*<sub>1</sub> = 17.6 Hz, *J*<sub>2</sub> = 8.7 Hz, 1H), 3.12 (dd, *J*<sub>1</sub> = 17.6 Hz, *J*<sub>2</sub> = 4.9 Hz, 1H), 2.30 (t, *J* = 2.2 Hz, 1H). **<sup>13</sup>C NMR (100 MHz, CDCl<sub>3</sub>)** δ 175.9, 173.5, 136.7, 131.9, 130.9, 128.8, 128.4, 128.0, 124.8, 123.2, 109.7, 86.0, 76.1, 73.1, 48.1, 34.0, 29.8. **HRMS** calculated  $[M+Na]^+$  for C<sub>20</sub>H<sub>15</sub>NO<sub>3</sub>Na: 340.0942, found: 340.0944. **FTIR (cm<sup>-1</sup>)** 2974, 2403, 1795, 1733, 1614, 1478, 1424, 1369, 1215, 1039, 928.

### (2*R*,3*S*)-5'-Chloro-1'-methyl-3-phenyl-3,4-dihydro-5*H*-spiro[furan-2,3'-indoline]-2',5-dione (**3n**)

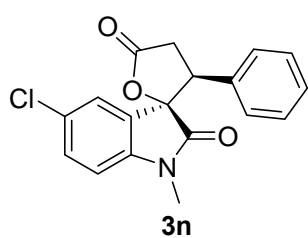

Following the general procedure, treatment of 3-hydroxy-1-methylindolin-2-one **1n** (41.0 mg, 0.25 mmol) and *trans* cinnamaldehyde **2a** (33.0 mg, 32 μL, 0.25 mmol) with triazolium salt **4** (9.2 mg, 0.025 mmol), oxidant **5** (102.0 mg, 0.25 mmol), LiCl (5.2 mg, 0.125 mmol), and DBU (7.6 mg, 7.5 μL, 0.05 mmol) in DME (2.0 mL) at 30 °C for 12 h followed by column chromatography afforded (2*R*,3*S*)-1'-methyl-3-phenyl-3,4-dihydro-5*H*-spiro[furan-2,3'-indoline]-2',5-dione **3n** as a yellow solid (53.0 mg, 65% yield, *dr* 3:1). [CCDC 1487677](https://www.ccdc.cam.ac.uk/data_request/cif) (For the further detail about crystal structure please visit [www.ccdc.cam.ac.uk/data\\_request/cif](https://www.ccdc.cam.ac.uk/data_request/cif))

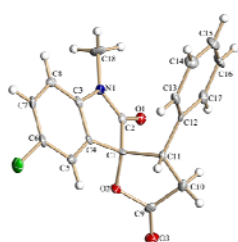

*R<sub>f</sub>* (Pet. ether /EtOAc = 70/30) 0.48; 91:9 er,  $[\alpha]_{\text{D}}^{25} = -141.0$  (c 0.1, CHCl<sub>3</sub>). **HPLC** (Chiralpak AD-H, 88:7:5 PE /MeOH/ IPA, 1.0 mL/min.) Major: 12.3 min, Minor: 20.0 min. **<sup>1</sup>H NMR (400 MHz, CDCl<sub>3</sub>)** δ 7.65 (d, *J* = 1.7 Hz, 1H, H<sub>ar</sub>), 7.48 (dd, *J* = 8.3, 1.8 Hz, 1H), 7.41-7.28 (m, 3H,

H<sub>ar</sub>), 7.07 (d,  $J = 7.1$  Hz, 2H), 6.72 (d,  $J = 7.4$  Hz, 1H), 4.16 (dd,  $J_1 = 13.7$  Hz,  $J_2 = 8.0$  Hz, 1H), 3.91 (dd,  $J_1 = 16.8$ ,  $J_2 = 13.8$  Hz, 1H), 3.04 (dd,  $J_1 = 16.8$  Hz,  $J_2 = 8.0$  Hz, 1H), 2.92 (s, 3H). <sup>13</sup>C NMR (100 MHz, CDCl<sub>3</sub>) δ 174.5, 172.4, 143.0, 131.8, 131.4, 129.1, 128.7, 128.6, 127.7, 124.8, 109.8, 86.2, 51.2, 32.1, 30.5, 26.1. HRMS calculated [M+Na]<sup>+</sup> for C<sub>18</sub>H<sub>14</sub>NO<sub>3</sub>ClNa: 350.0554, found: 350.0554. FTIR (cm<sup>-1</sup>) 2972, 2403, 1798, 1728, 1612, 1432, 1216, 1107, 1039, 922.

### 3 (2*R*,3*R*)-3-Heptyl-1'-methyl-3,4-dihydro-5*H*-spiro[furan-2,3'-indoline]-2',5-dione (3o)

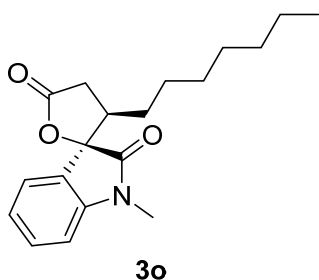

Following the general procedure, treatment of 3-hydroxy-1-methylindolin-2-one **1a** (41.0 mg, 0.25 mmol) and (*E*)-dec-2-enal **2o** (39.0 mg, 46 μL, 0.50 mmol) with triazolium salt **4** (9.2 mg, 0.025 mmol), oxidant **5** (102.0 mg, 0.25 mmol), LiCl (5.2 mg, 0.125 mmol), and DBU (7.6 mg, 7.5 μL, 0.05 mmol) in DME (2.0 mL) at 30 °C for 12 h followed by column chromatography afforded (2*R*,3*R*)-3-heptyl-1'-methyl-3,4-dihydro-5*H*-spiro[furan-2,3'-

indoline]-2',5-dione (**3o**) as a yellow sticky liquid (35.0 mg, 45% yield, dr 2:1).

*R<sub>f</sub>* (Pet. ether /EtOAc = 70/30): 0.66; 57:43 er, HPLC (Chiralpak AD-H, 88:7:5 PE /MeOH/ IPA, 1.0 mL/min.) Major: 11.1 min, Minor: 7.9 min. <sup>1</sup>H NMR (400 MHz, CDCl<sub>3</sub>) δ 7.42 – 7.30 (m, 2H), 7.11 (t,  $J = 7.5$  Hz, 1H), 6.84 (d,  $J = 7.8$  Hz, 1H), 3.16 (s, 3H), 2.95 (m, 1H), 2.74 (m, 2H), 1.50 – 1.30 (m, 1H), 1.30 – 0.95 (m, 12H), 0.81 (t,  $J = 7.0$  Hz, 3H). <sup>13</sup>C NMR (101 MHz, CDCl<sub>3</sub>) δ 175.6, 173.3, 144.5, 131.2, 125.4, 124.3, 123.6, 108.8, 85.6, 45.5, 33.6, 31.7, 29.3, 29.0, 28.4, 28.0, 26.3, 22.6, 14.1. HRMS calculated [M+Na]<sup>+</sup> for C<sub>19</sub>H<sub>25</sub>NO<sub>3</sub>Na: 338.1727, found: 338.1719. FTIR (cm<sup>-1</sup>) 2929, 2861, 2404, 1792, 1726, 1616, 1467, 1422, 1368, 1302, 1216, 1010.

## 8. $^1\text{H}$ and $^{13}\text{C}$ NMR Spectra of spiro $\gamma$ -butyrolactones

### (2*R*,3*S*)-1'-Methyl-3-phenyl-3,4-dihydro-5*H*-spiro[furan-2,3'-indoline]-2',5-dione (3a)

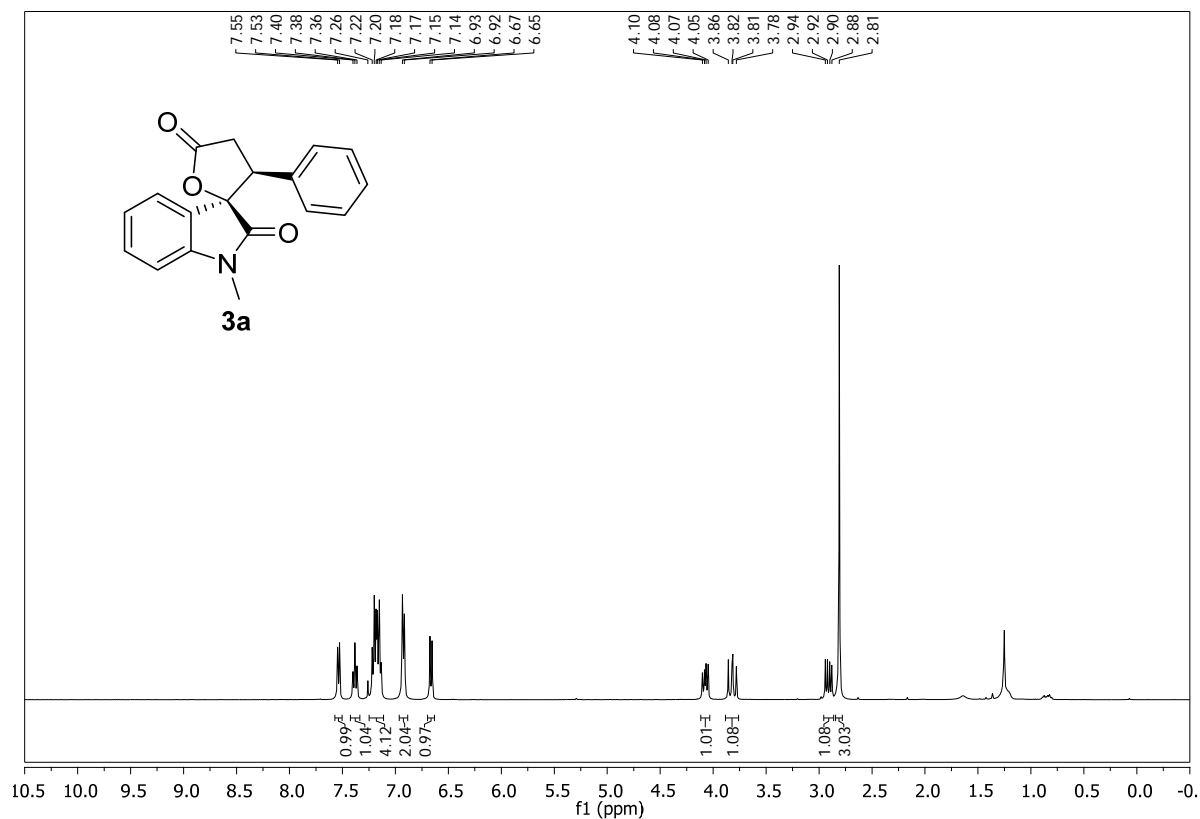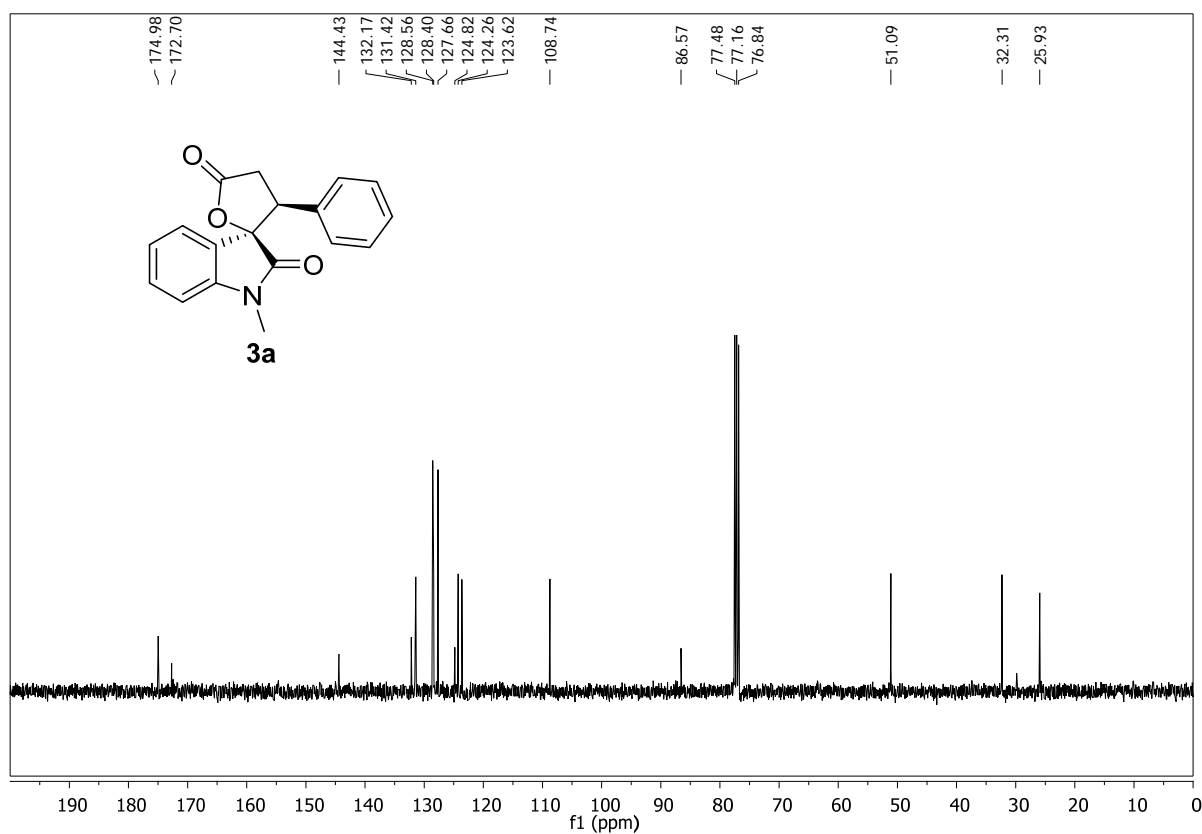

**(2*R*,3*S*)-3-(4-Methoxyphenyl)-1'-methyl-3,4-dihydro-5*H*-spiro[furan-2,3'-indoline]-2',5-dione (3b)**

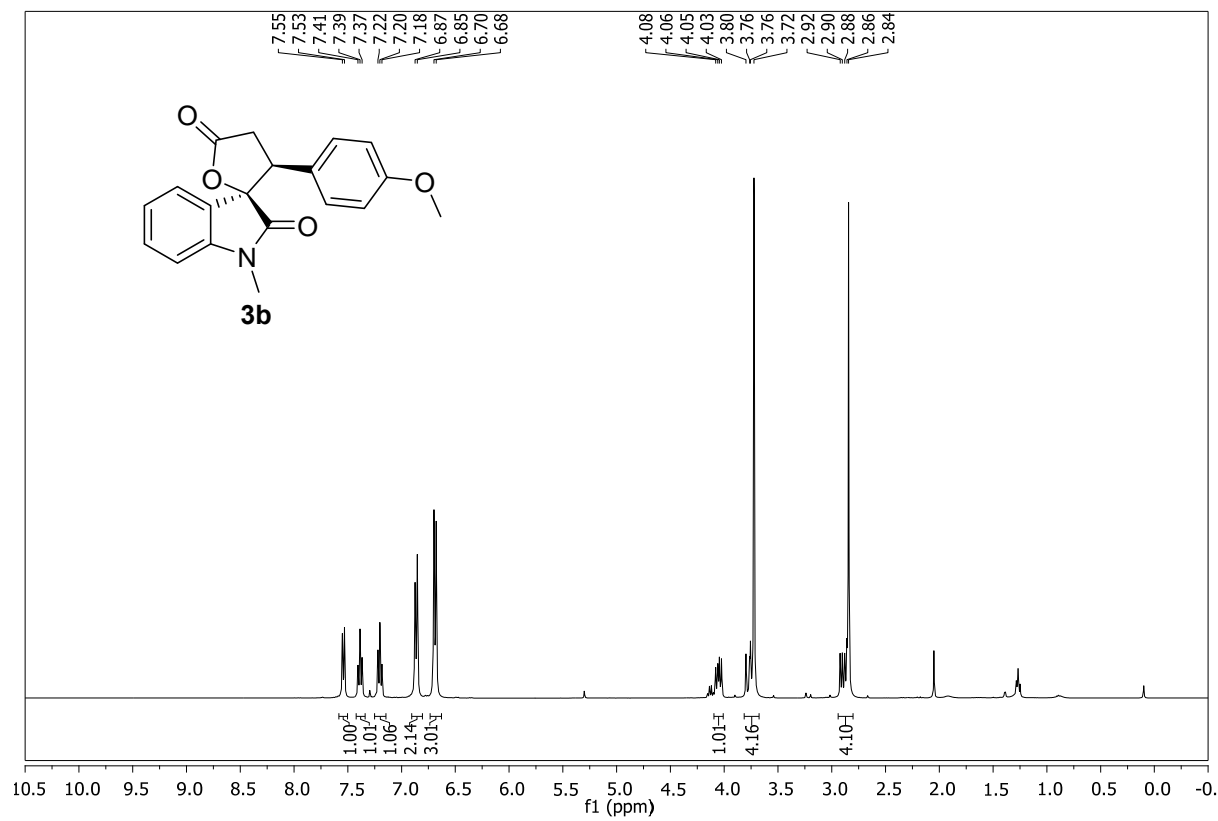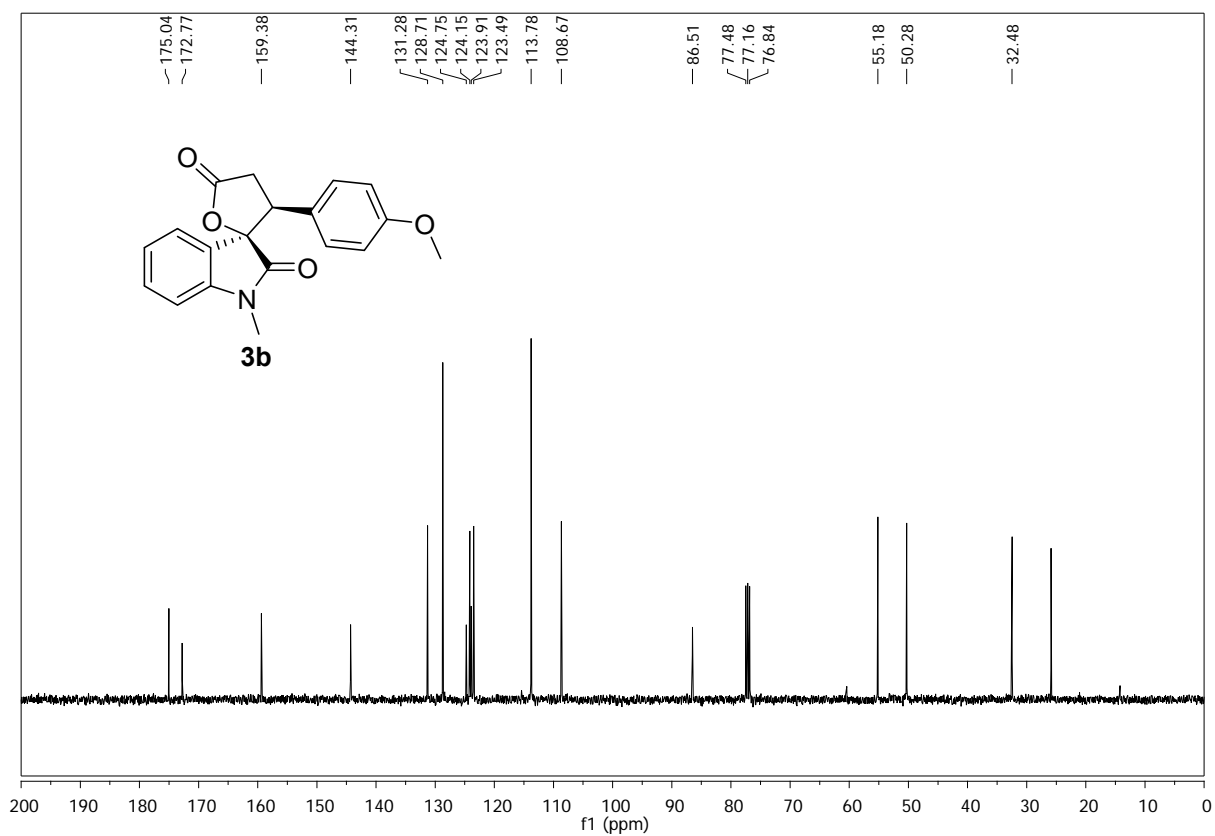

**(2*R*,3*S*)-1'-Methyl-3-(*p*-tolyl)-3,4-dihydro-5*H*-spiro[furan-2,3'-indoline]-2',5-dione (3c)**

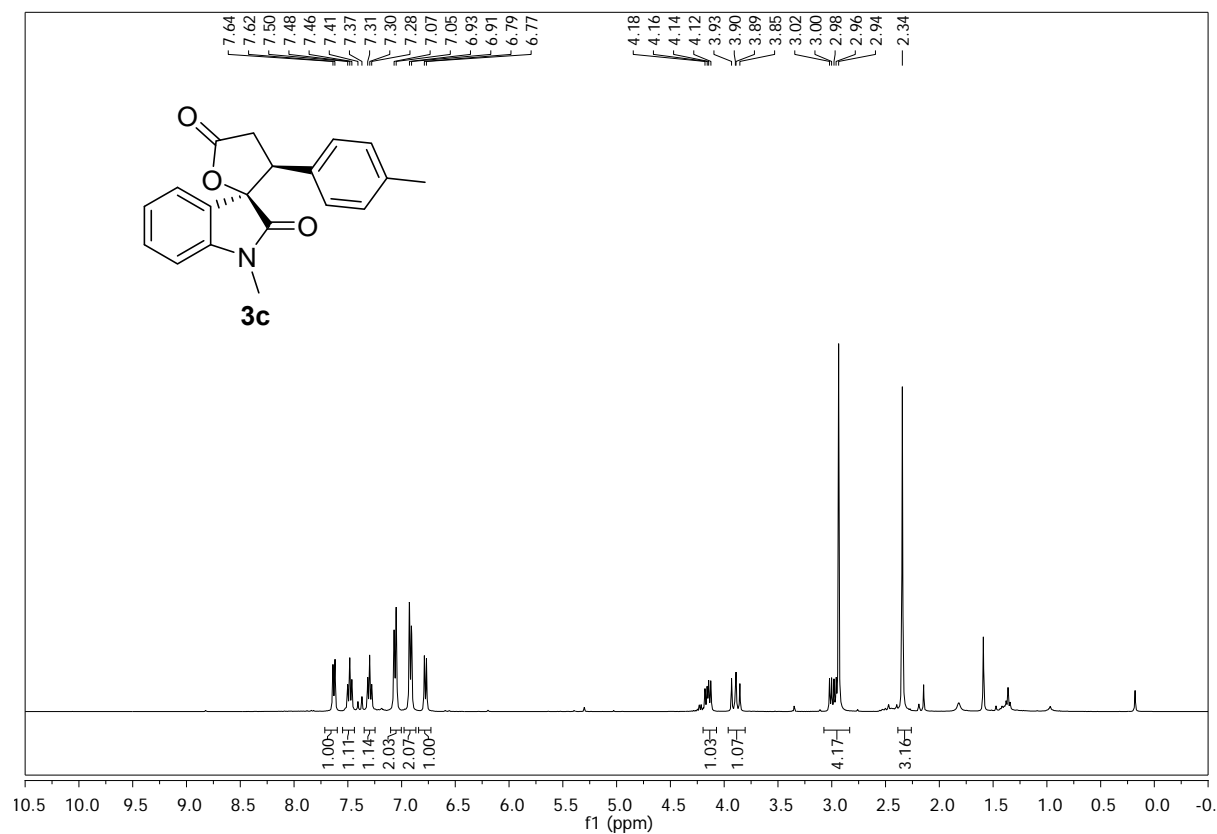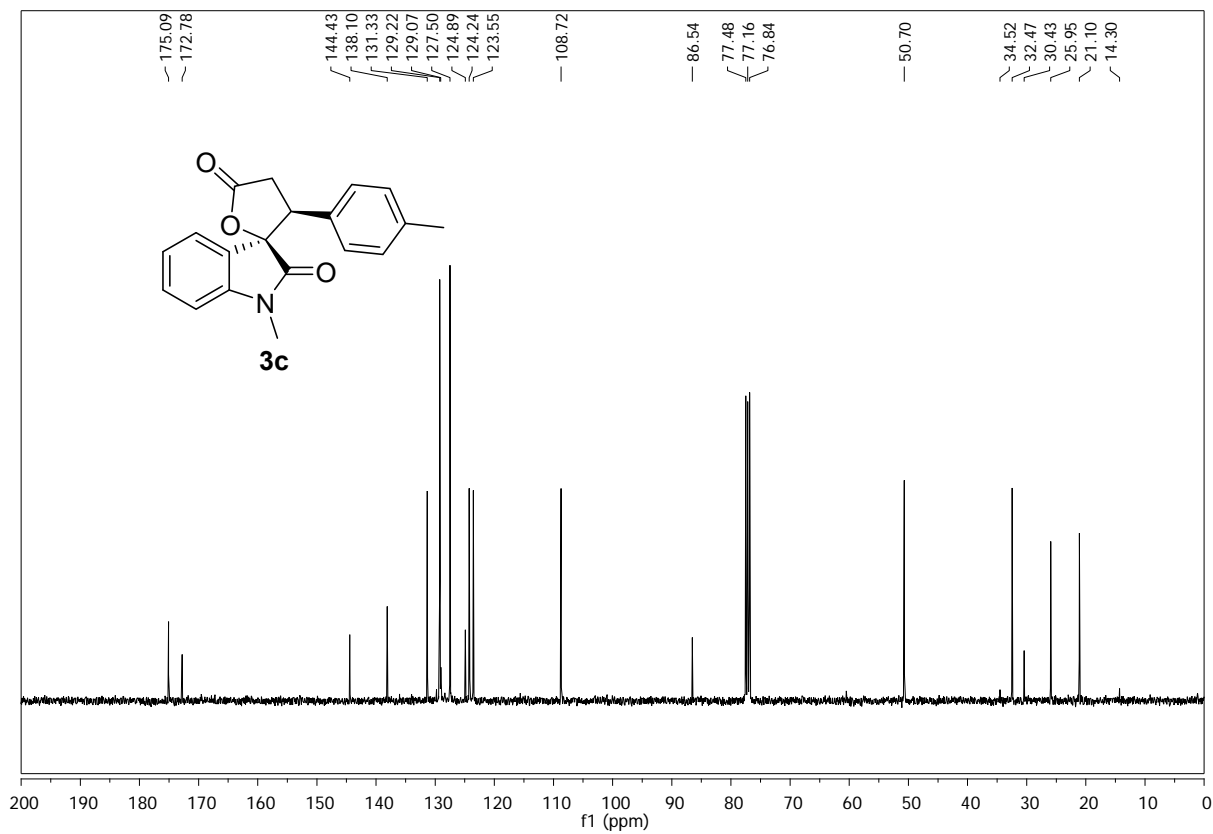



**(2*R*,3*S*)-3-(4-Fluorophenyl)-1'-methyl-3,4-dihydro-5*H*-spiro[furan-2,3'-indoline]-2',5-dione (3d)**

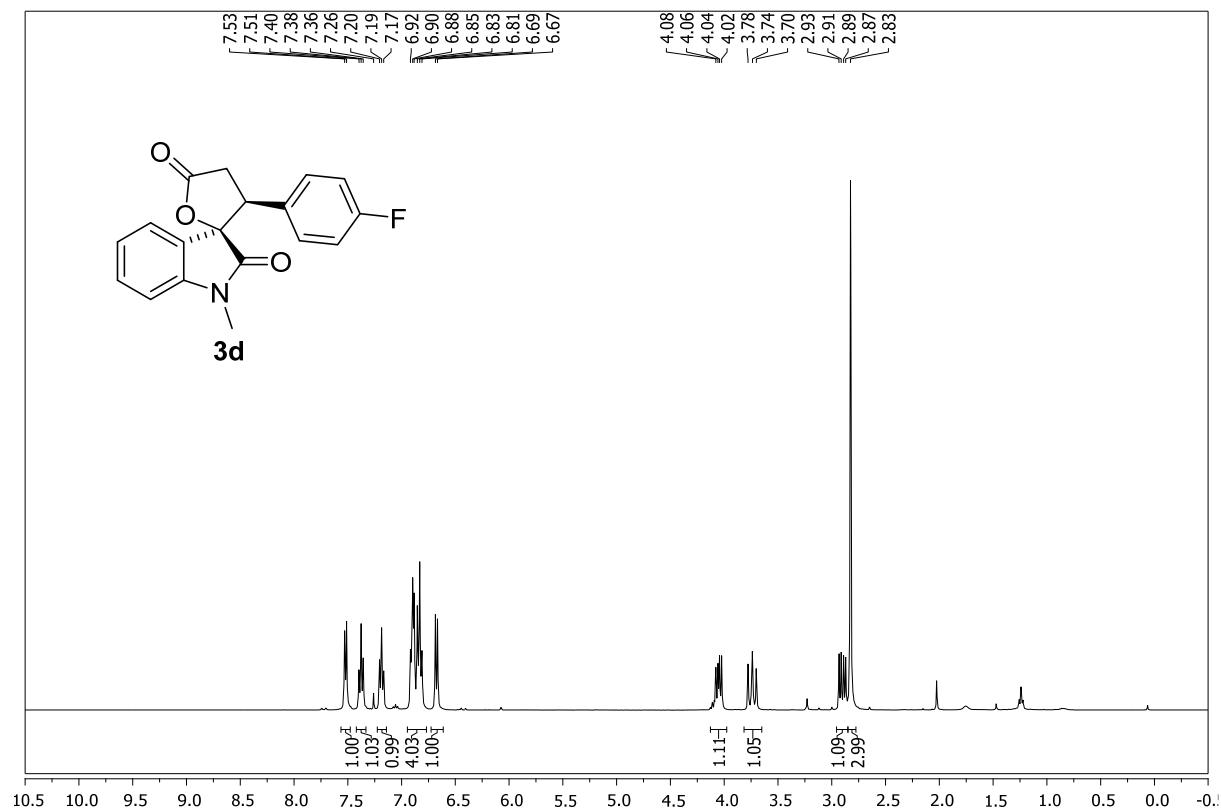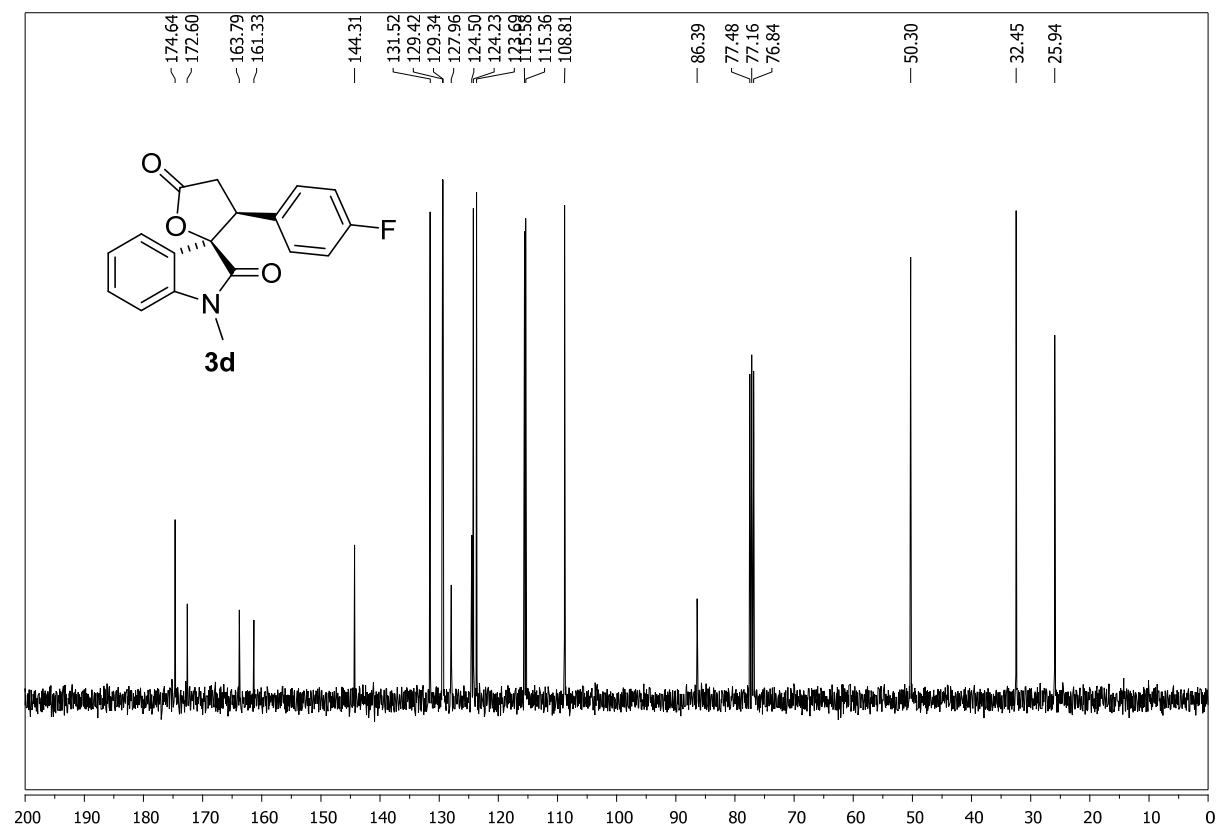

Methyl 4-((2*R*,3*S*)-1'-methyl-2',5-dioxo-4,5-dihydro-3*H*-spiro[furan-2,3'-indolin]-3-yl)benzoate (**3e**)

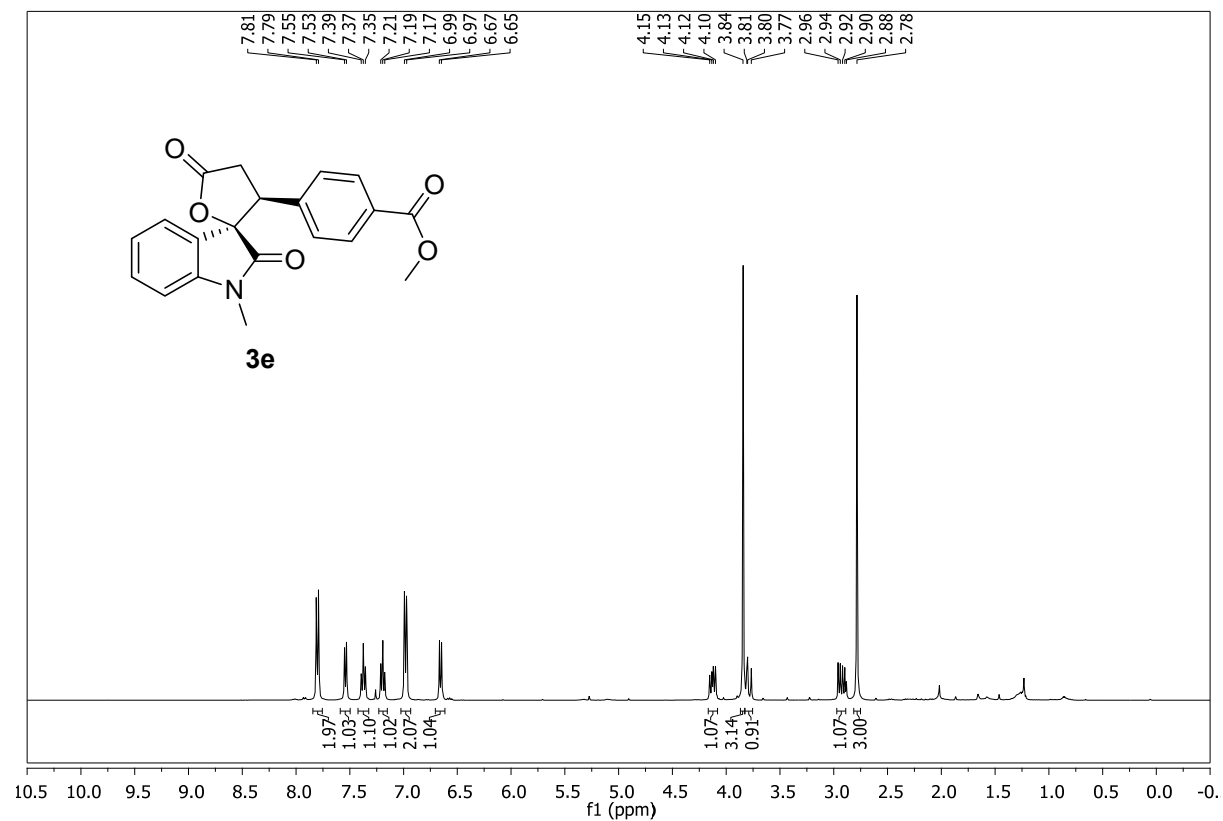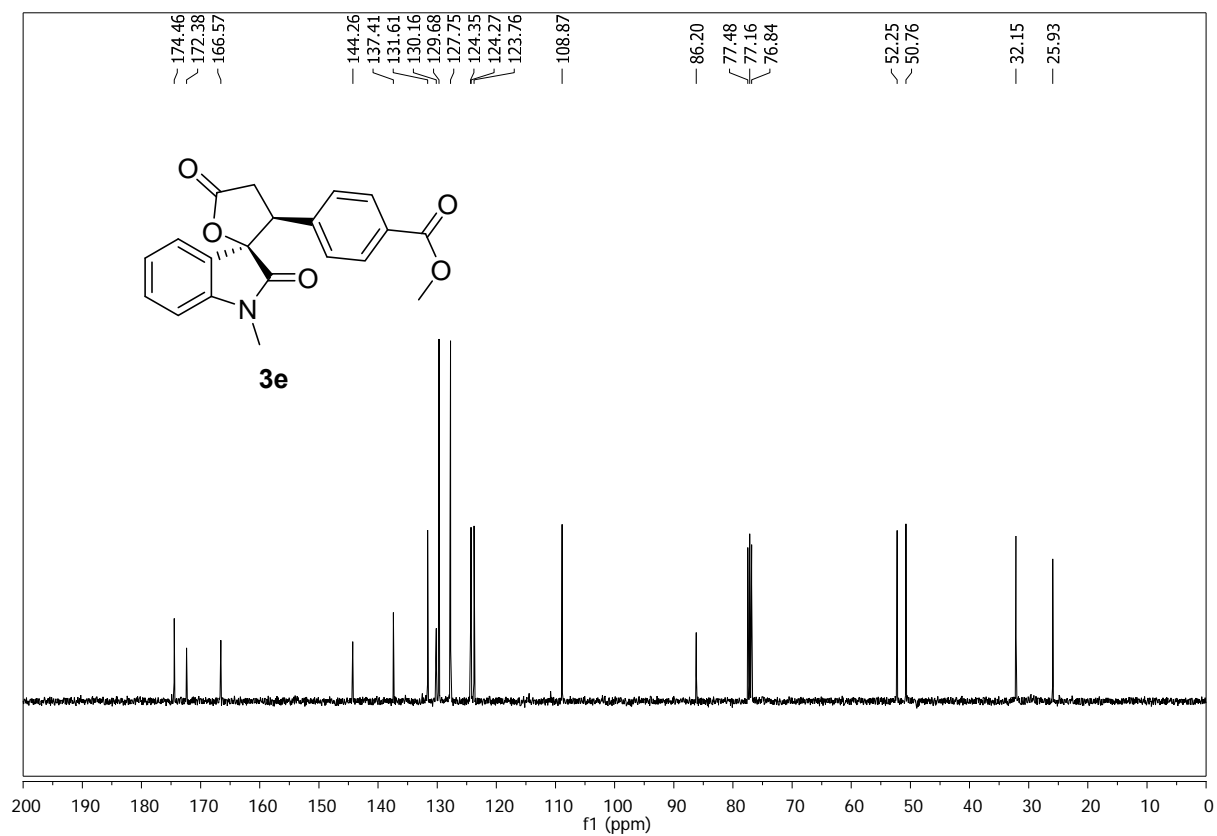

**(2*R*,3*S*)-1'-Methyl-3-(4-(trifluoromethyl)phenyl)-3,4-dihydro-5*H*-spiro[furan-2,3'-indoline]-2',5-dione (3f)**

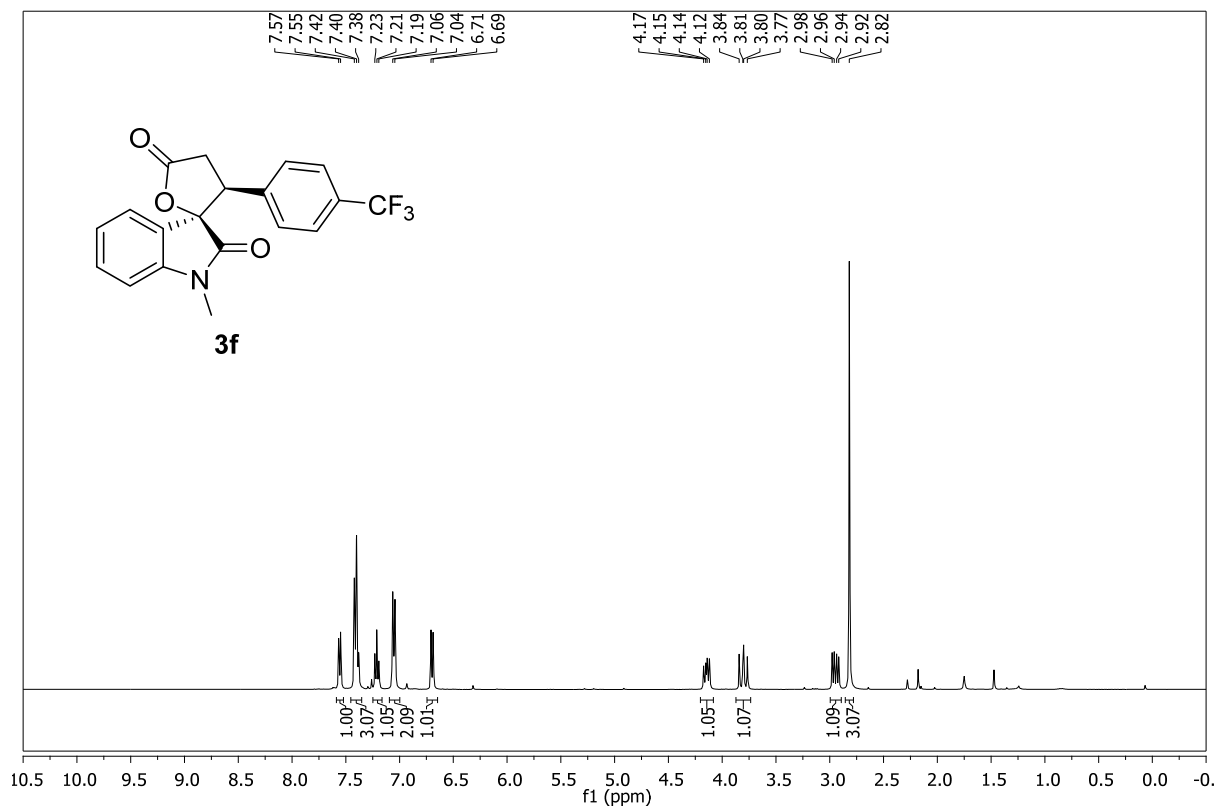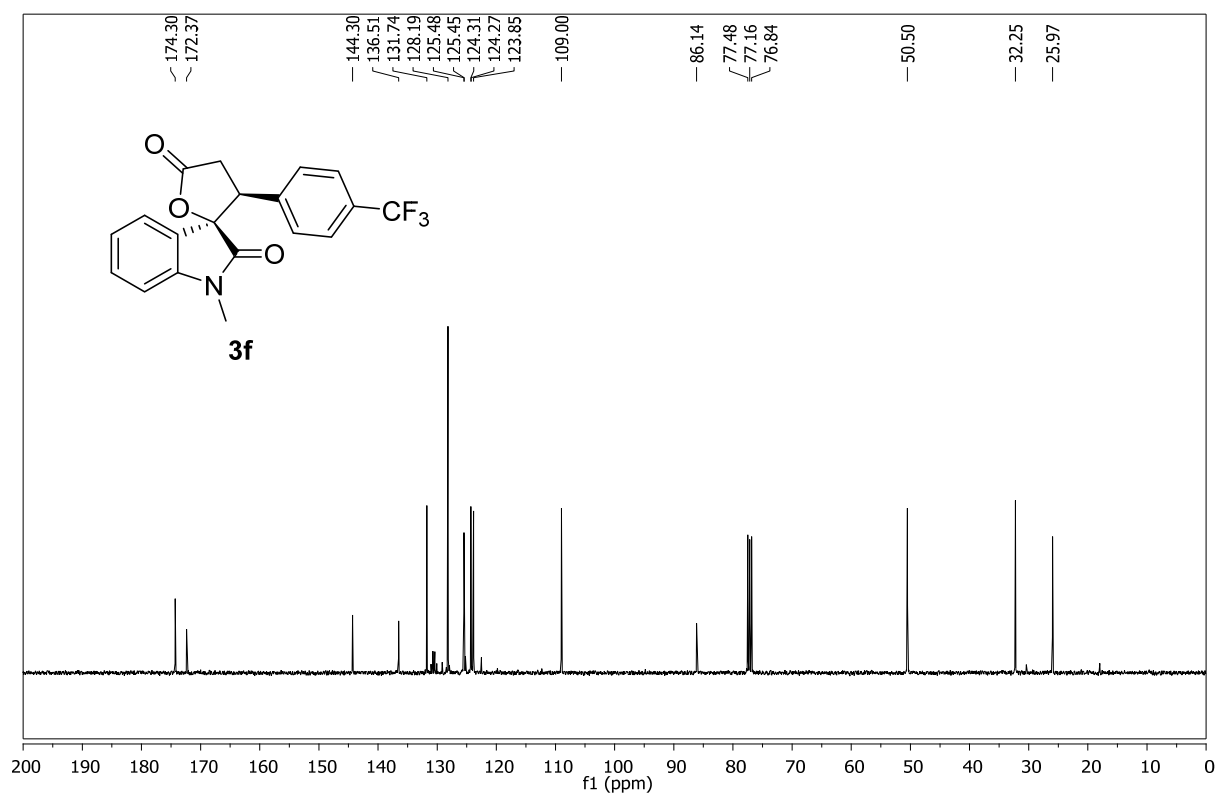

**(2*R*,3*S*)-1'-Methyl-3-(4-nitrophenyl)-3,4-dihydro-5*H*-spiro[furan-2,3'-indoline]-2',5-dione (3g)**

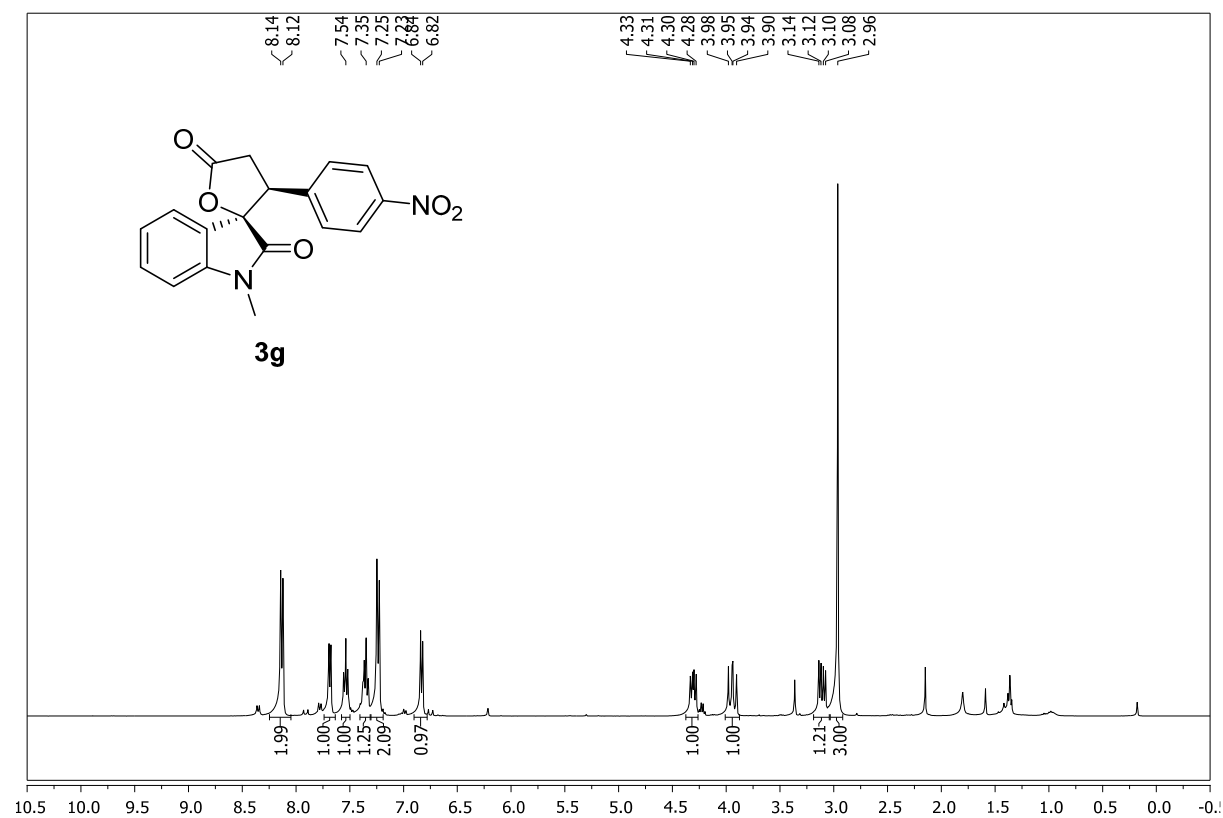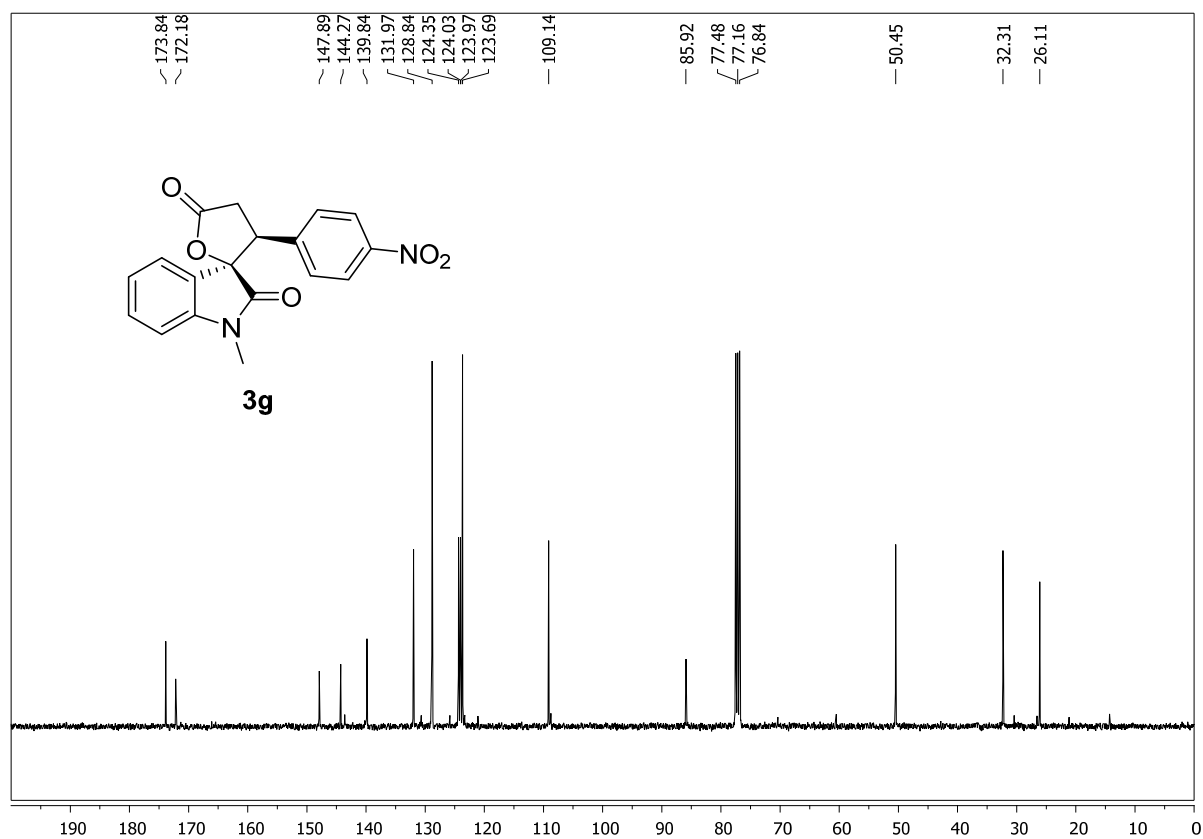

**(2*R*,3*S*)-3-(2-Methoxyphenyl)-1'-methyl-3,4-dihydro-5*H*-spiro[furan-2,3'-indoline]-2',5-dione (3h)**

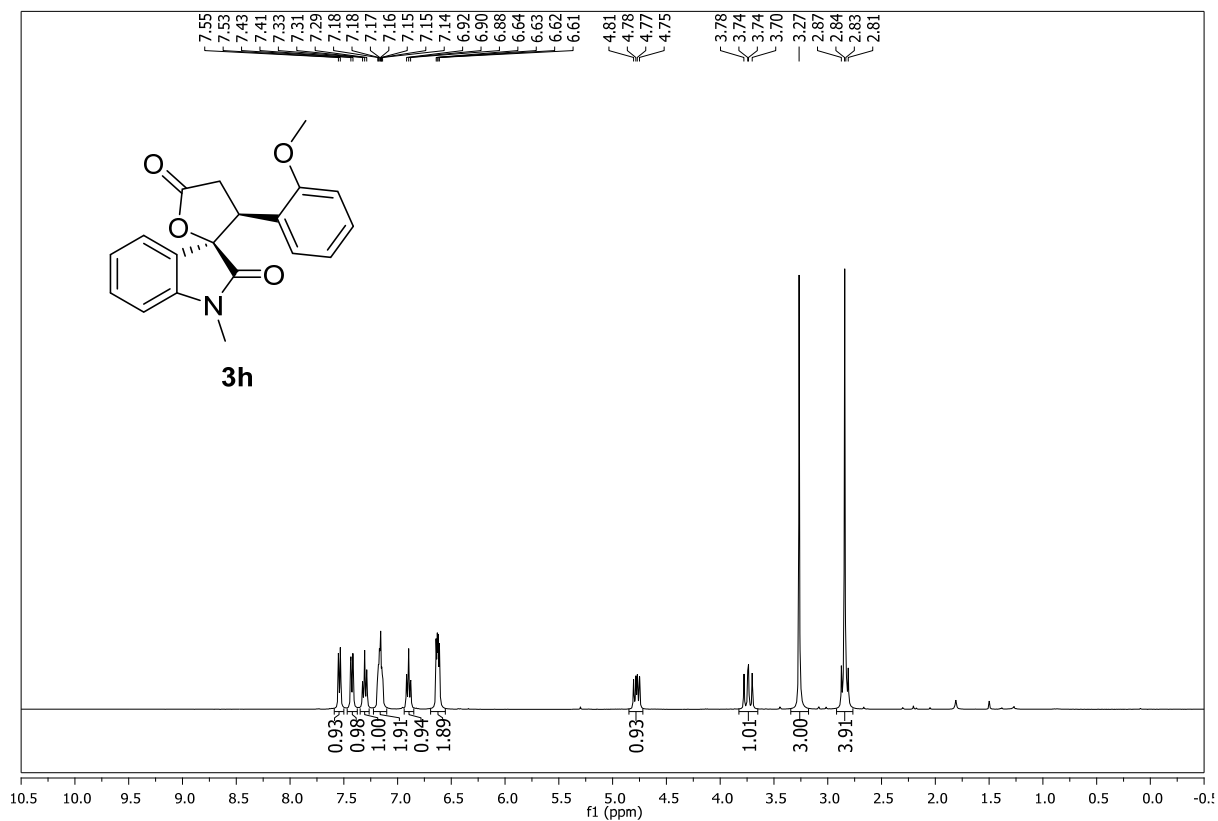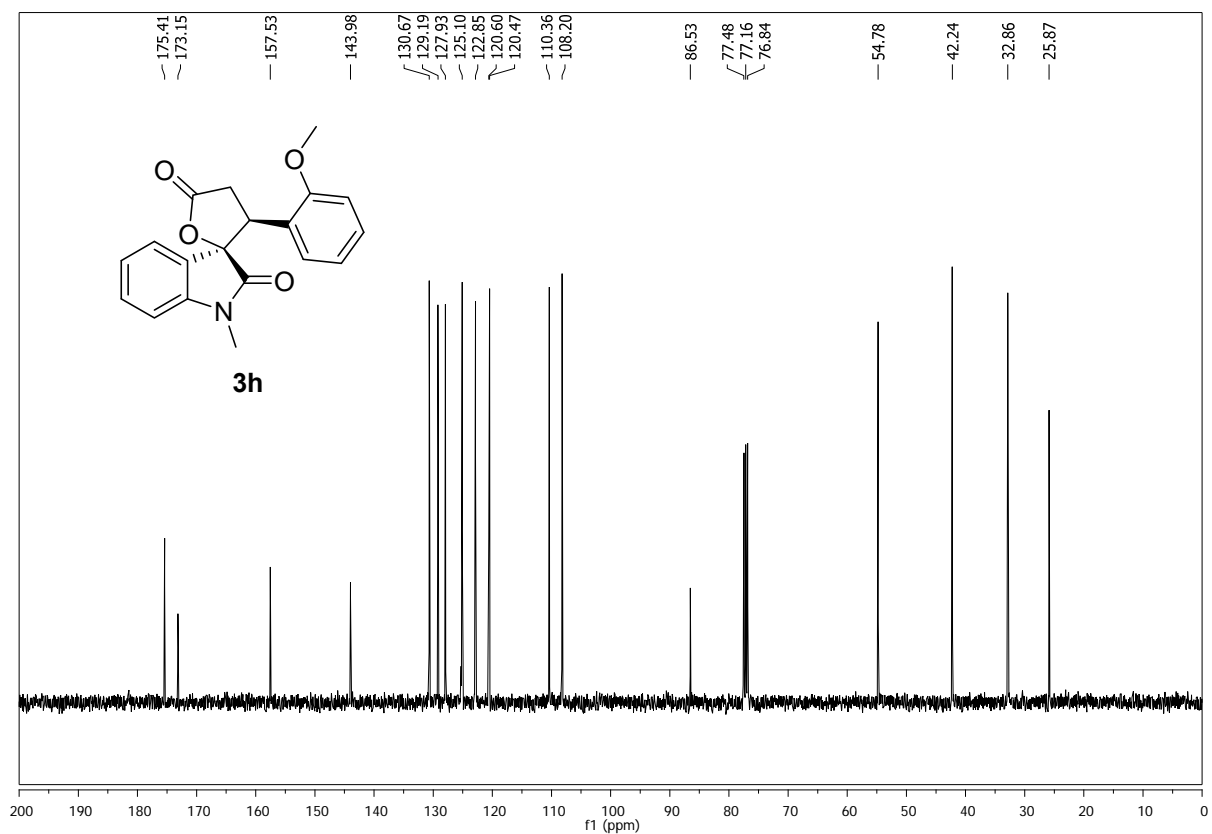

**(2*R*,3*S*)-3-(2-Fluorophenyl)-1'-methyl-3,4-dihydro-5*H*-spiro[furan-2,3'-indoline]-2',5-dione (3i)**

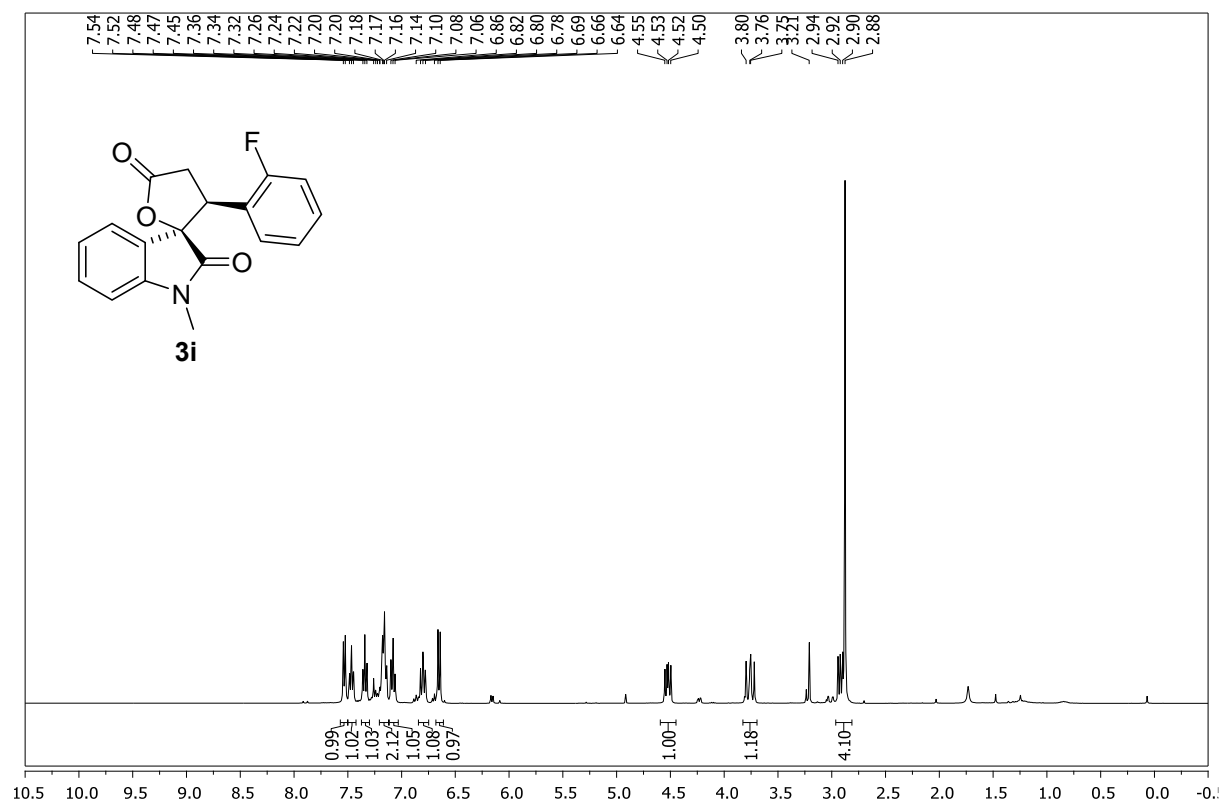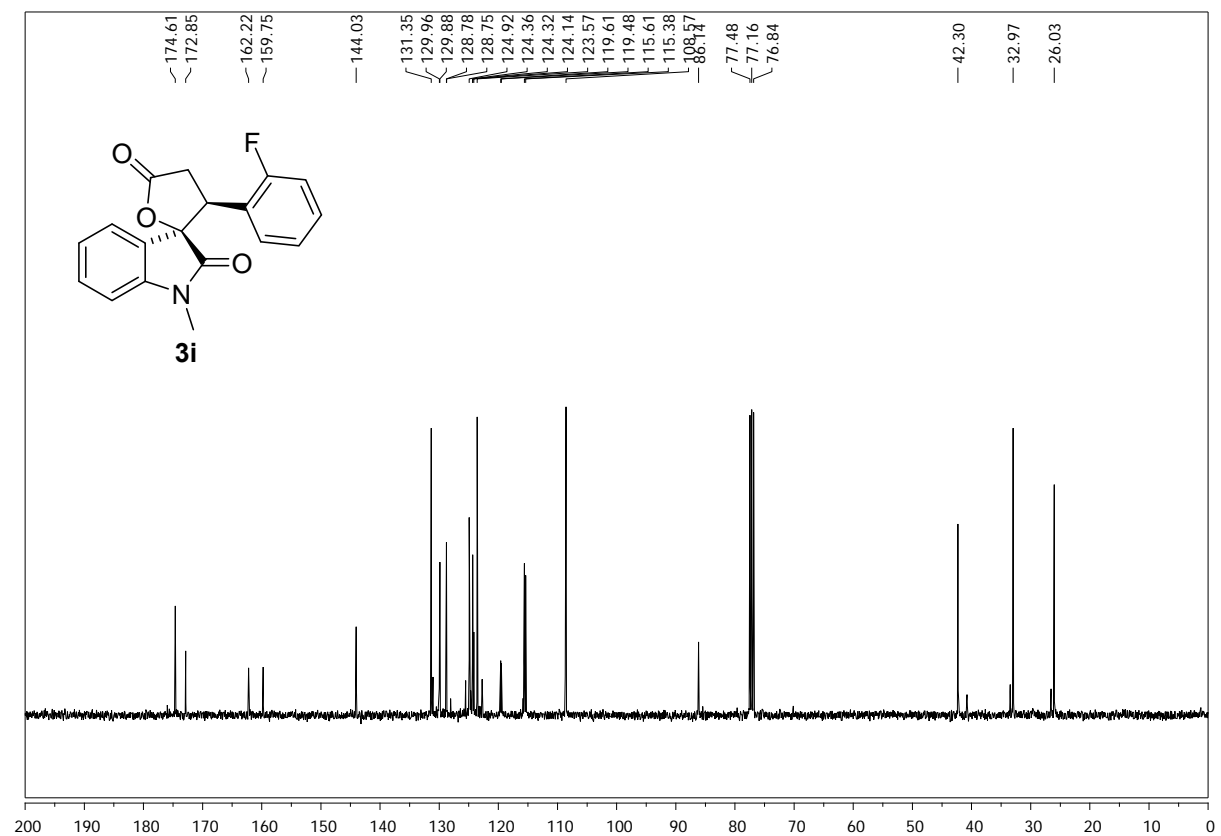

**(2*R*,3*S*)-3-(Furan-2-yl)-1'-methyl-3,4-dihydro-5*H*-spiro[furan-2,3'-indoline]-2',5-dione**

**(3j)**

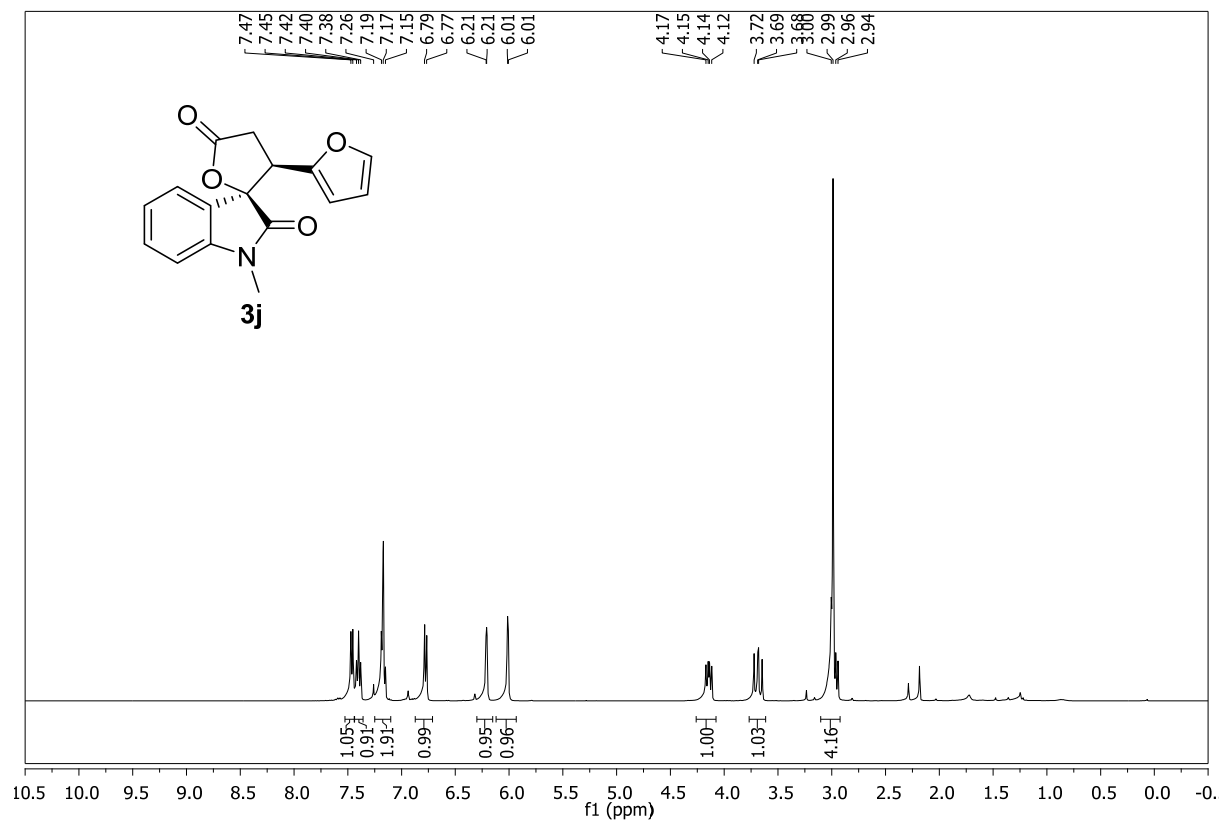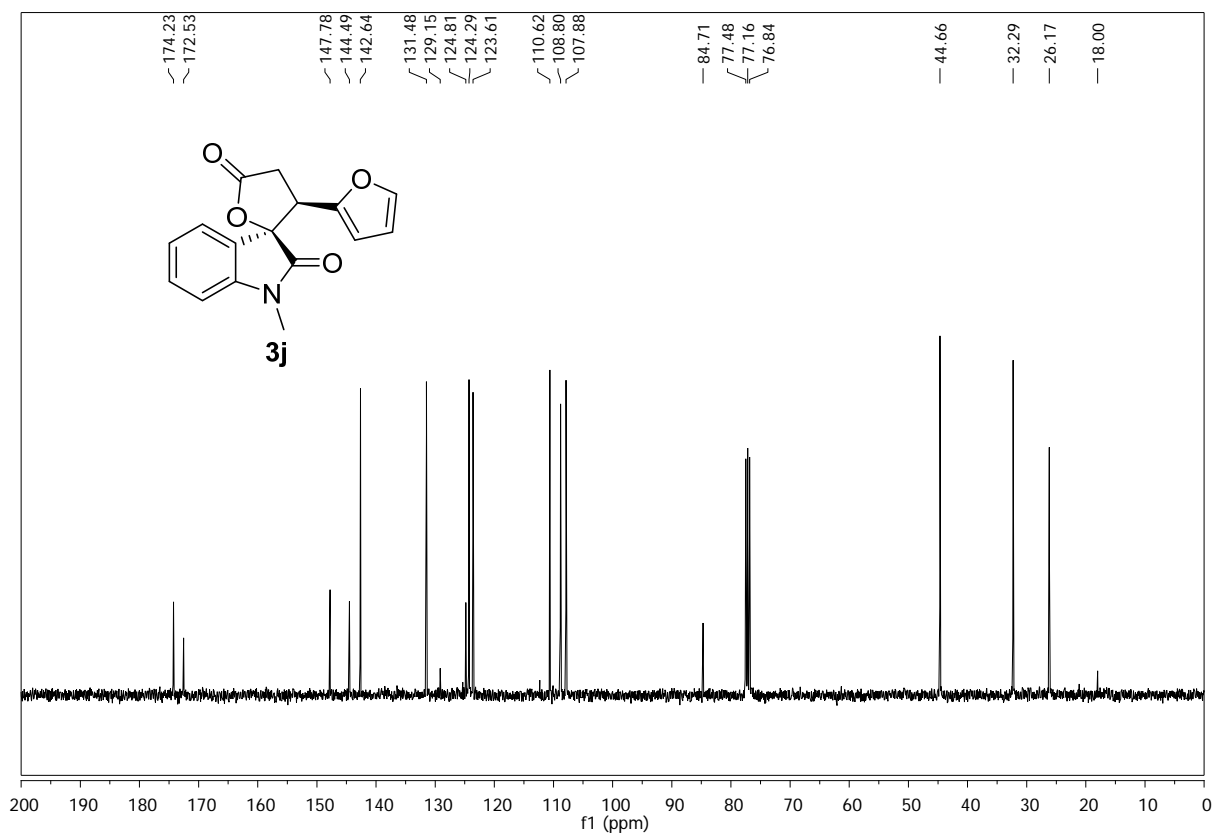

**(2*R*,3*S*)-1'-Benzyl-3-phenyl-3,4-dihydro-5*H*-spiro[furan-2,3'-indoline]-2',5-dione (3k)**

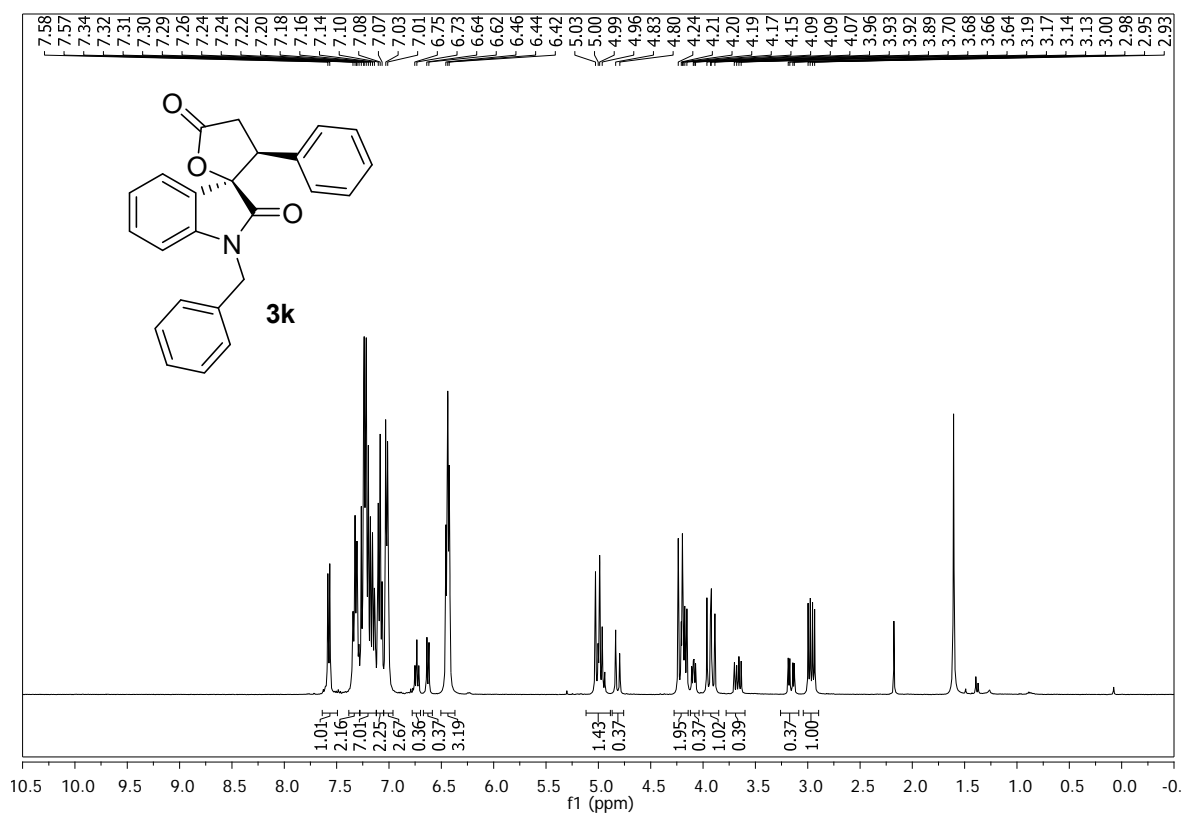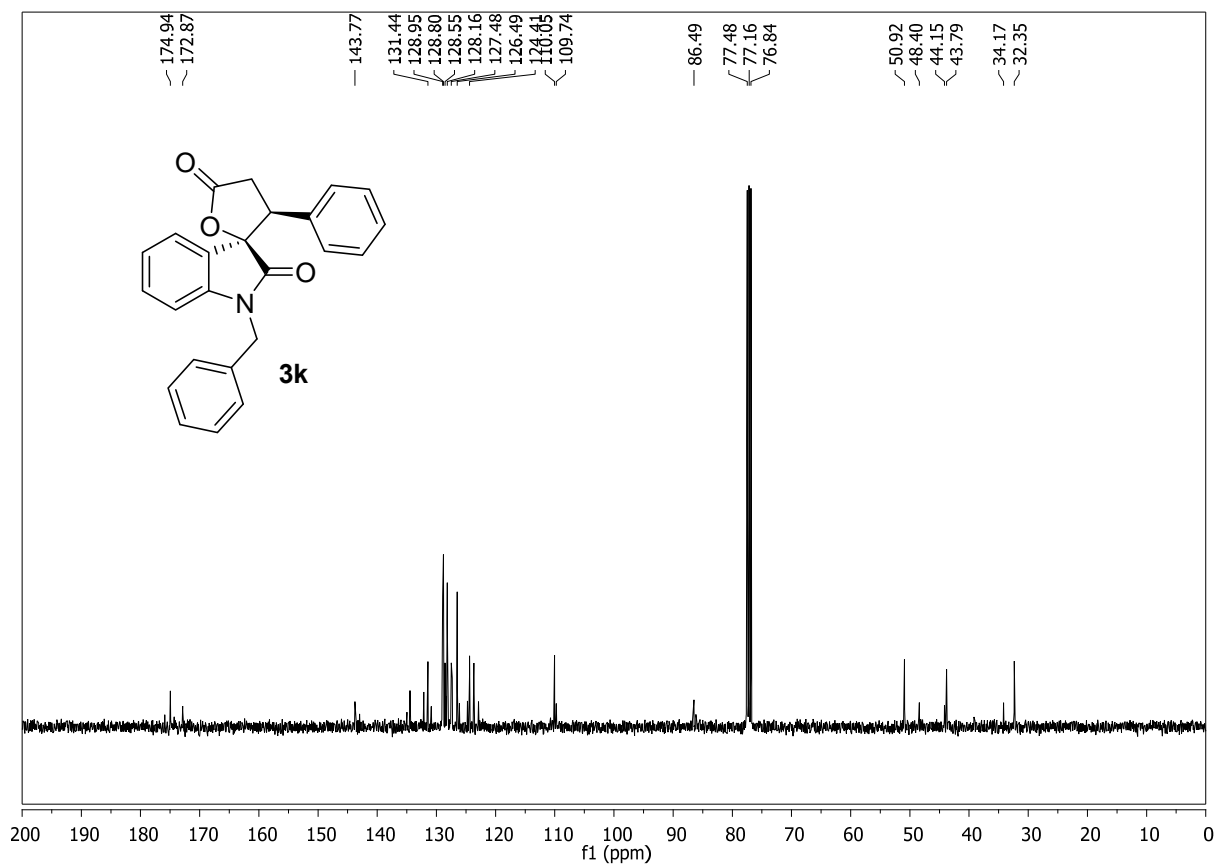



**(2*R*,3*S*)-1'-Allyl-3-phenyl-3,4-dihydro-5*H*-spiro[furan-2,3'-indoline]-2',5-dione (31)**

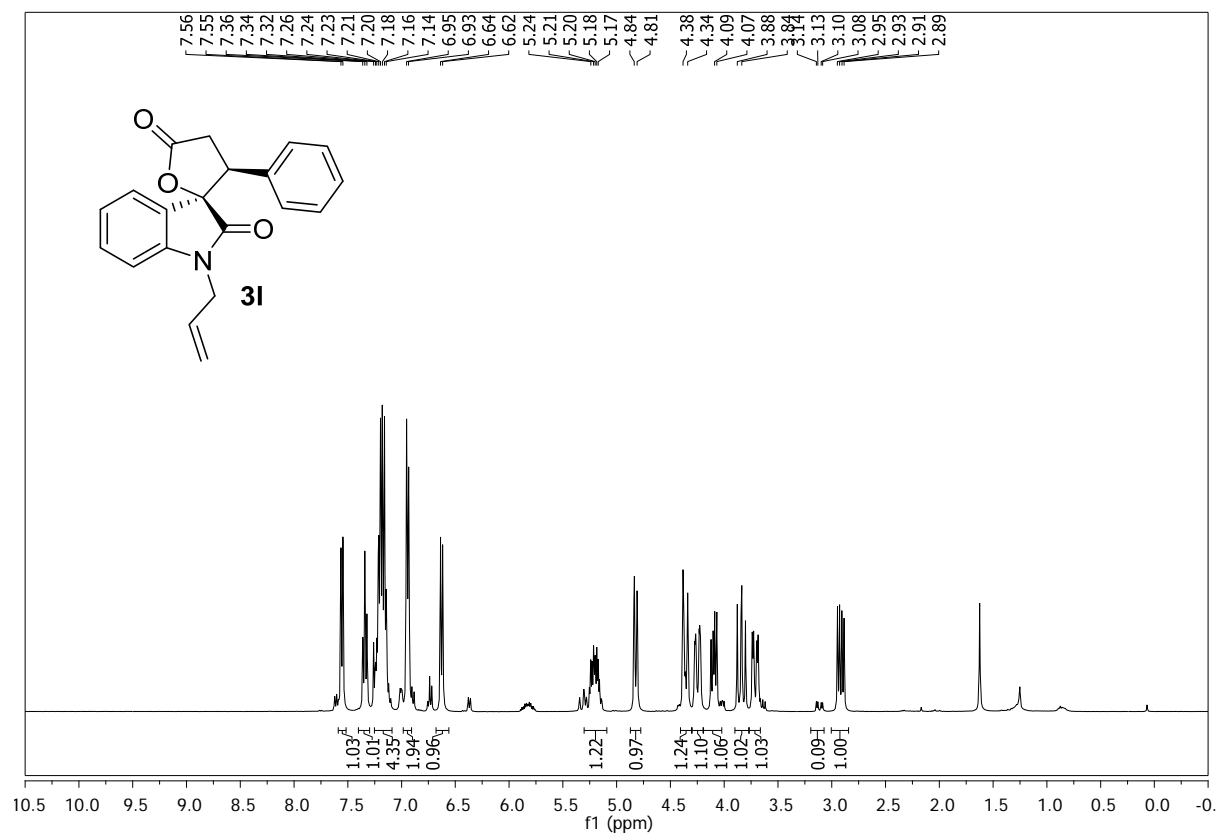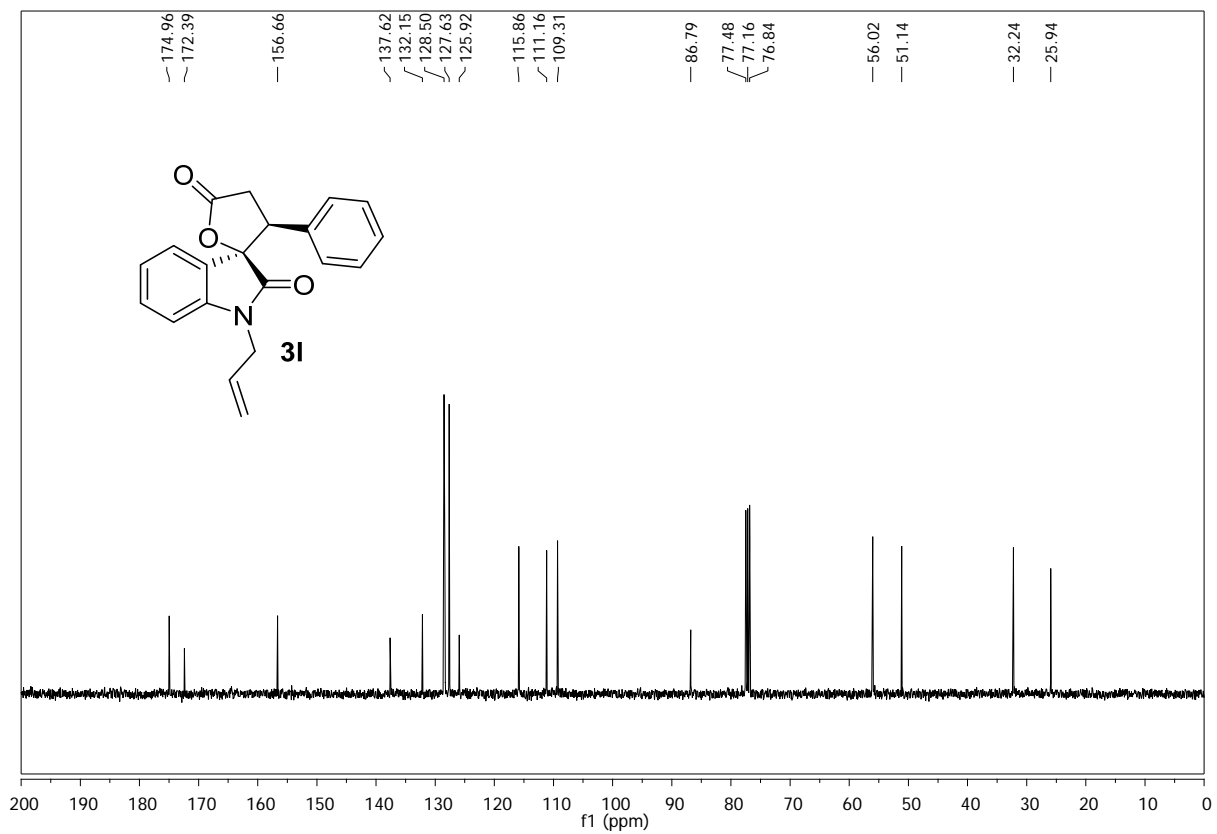

**(2*R*,3*S*)-3-Phenyl-1'-(prop-2-yn-1-yl)-3,4-dihydro-5*H*-spiro[furan-2,3'-indoline]-2',5-dione (3m)**

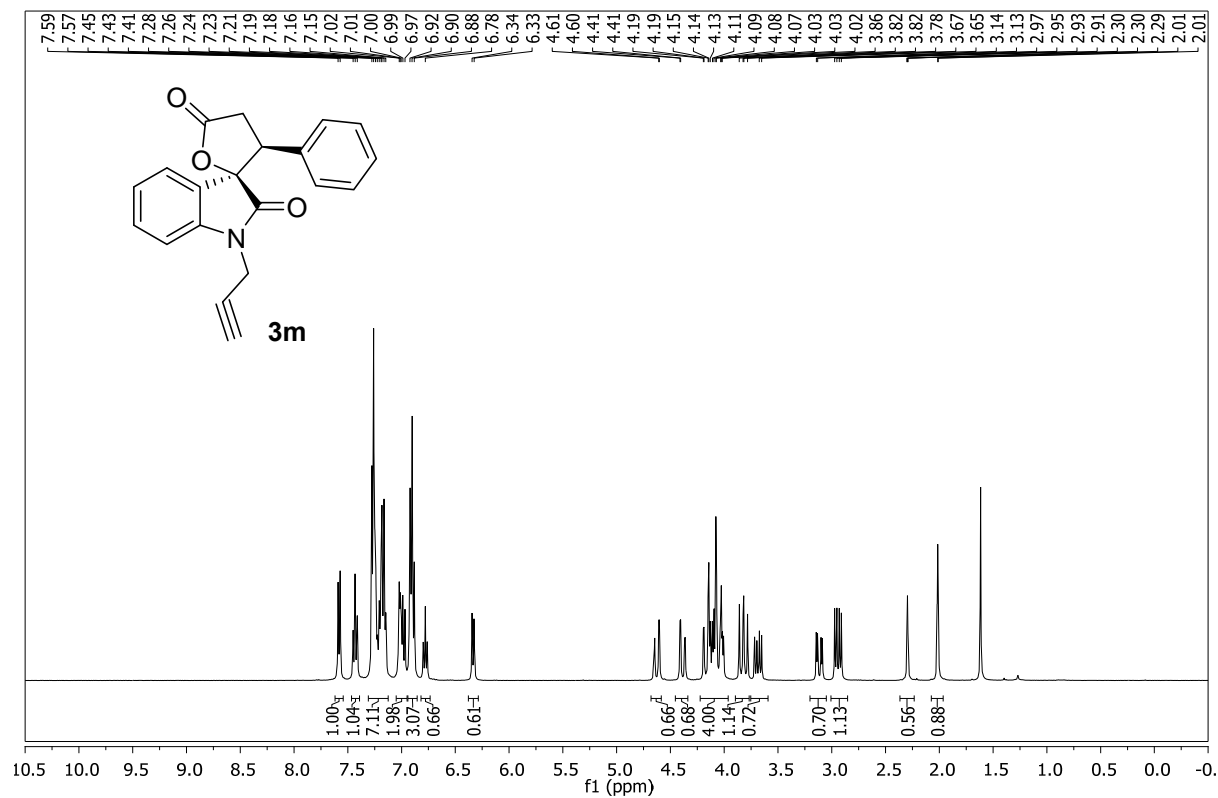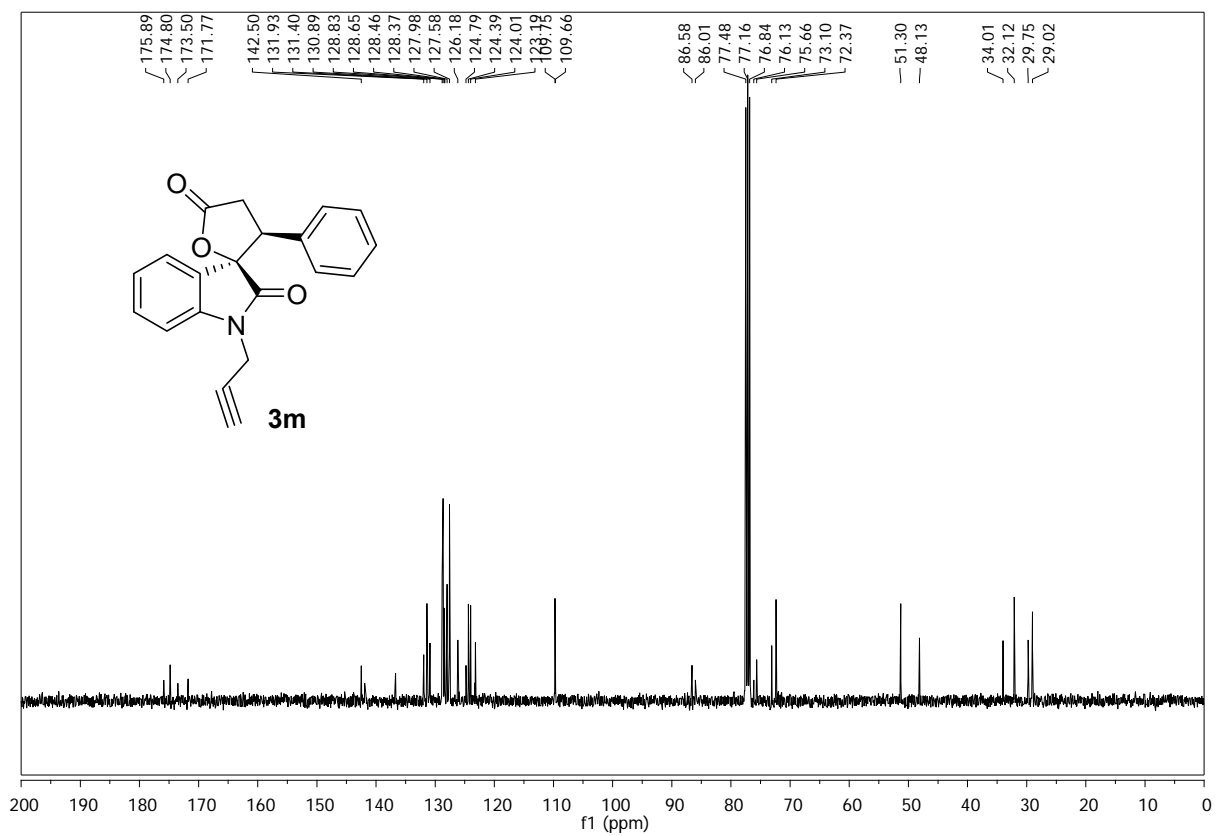

**(2*R*,3*S*)-5'-Chloro-1'-methyl-3-phenyl-3,4-dihydro-5*H*-spiro[furan-2,3'-indoline]-2',5-dione (3n)**

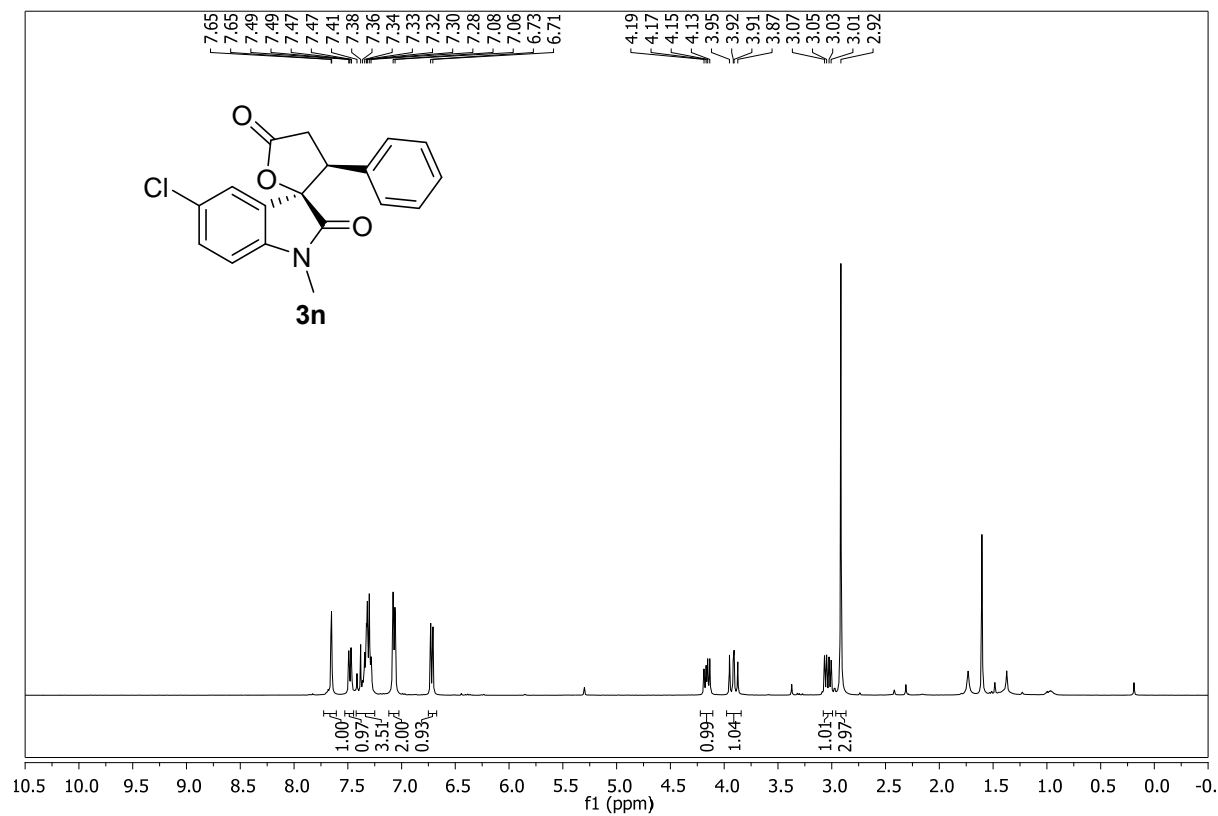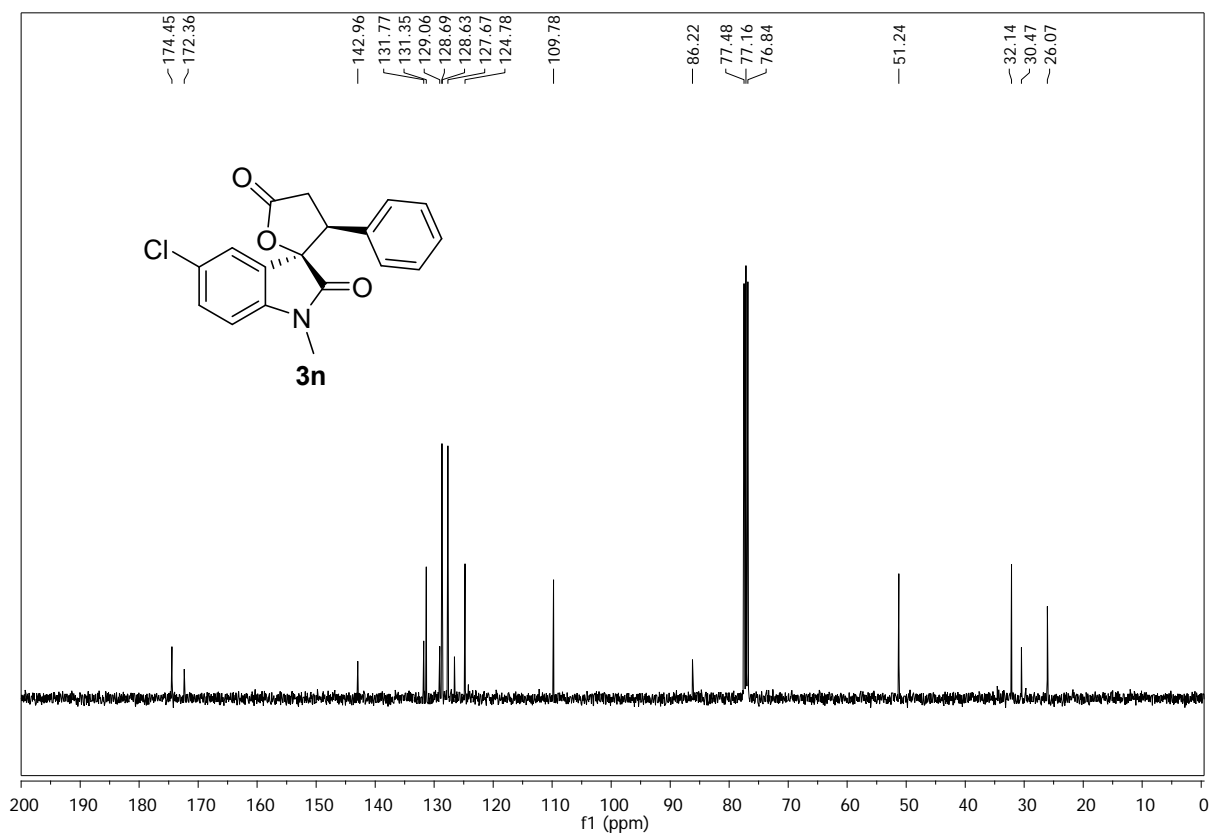

**3 (2*R*,3*R*)-3-Heptyl-1'-methyl-3,4-dihydro-5*H*-spiro[furan-2,3'-indoline]-2',5-dione (3o)**

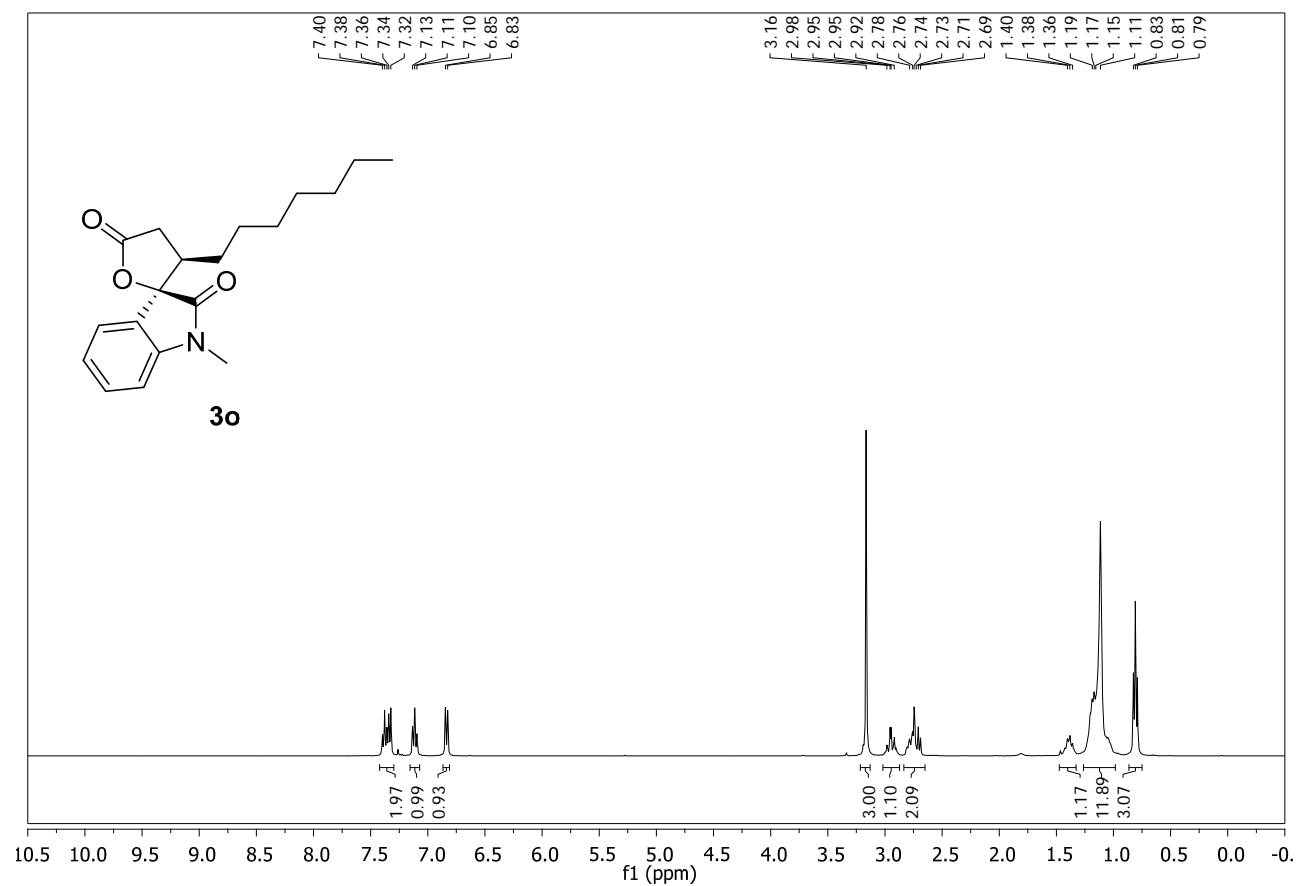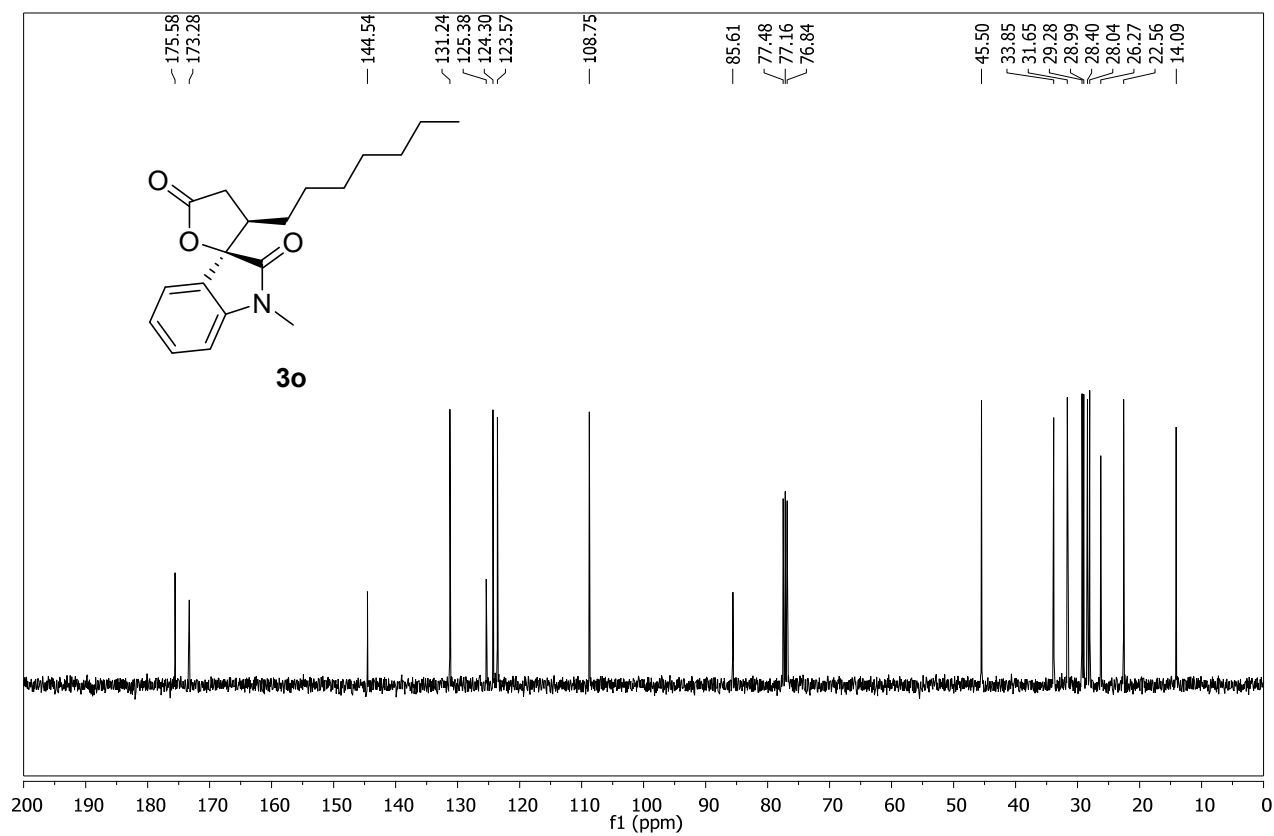

## 9. HPLC Data of spiro $\gamma$ -butyrolactones

### (2*R*,3*S*)-1'-Methyl-3-phenyl-3,4-dihydro-5*H*-spiro[furan-2,3'-indoline]-2',5-dione (3a)

Data File: D:\BIJU\SBMISATIN ALCHOLE FINAL COMPOUND\parent\SUM-SD-39.dat  
 Method: D:\BIJU\Method\5% IPA-7% MeOH-88%PE,254NMrr, 1.0ML-MIN.MET  
 Acquired: 9/8/2015 1:16:57 AM Printed: 7/12/2016 11:03:35 AM

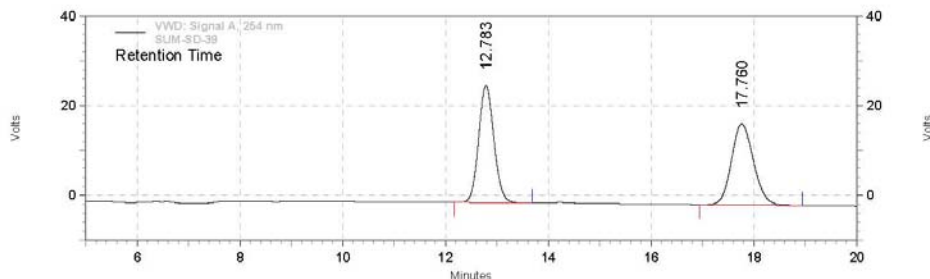

#### VWD: Signal A, 254 nm Results

| Retention Time | Area            | Area %        |
|----------------|-----------------|---------------|
| 12.783         | 9029196         | 49.98         |
| 17.760         | 9037522         | 50.02         |
| <b>Totals</b>  | <b>18066718</b> | <b>100.00</b> |

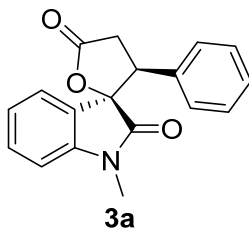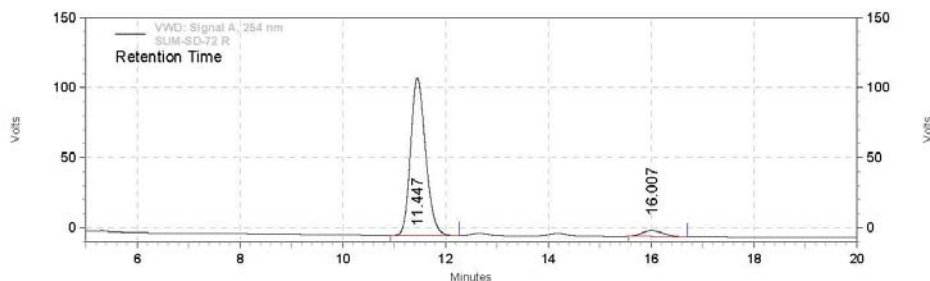

#### VWD: Signal A, 254 nm Results

| Retention Time | Area            | Area %        |
|----------------|-----------------|---------------|
| 11.447         | 38156779        | 94.97         |
| 16.007         | 2019334         | 5.03          |
| <b>Totals</b>  | <b>40176113</b> | <b>100.00</b> |

Column : Chiralpak AD  
 Eluent System : 88:7:5 (Pet ether:MeOH:IPA)  
 Flow rate: 1.0 ml/min  
 Injection vol.: 10ul  
 Wavelength: 254 nm  
 Sample Conc.: 1 mg/ml

**(2*R*,3*S*)-3-(4-Methoxyphenyl)-1'-methyl-3,4-dihydro-5*H*-spiro[furan-2,3'-indoline]-2',5-dione (3b)**

Data File: D:\BIJU\SBM\ISATIN ALCHOLE FINAL COMPOUND\4-ome-sum-se-10\SUM-SE-10  
 RACEMIC.dat  
 Method: D:\method\10% IPA-PE- C-D 1 port.met  
 Acquired: 4/20/2016 12:36:37 PM Printed: 7/12/2016 10:22:35 AM

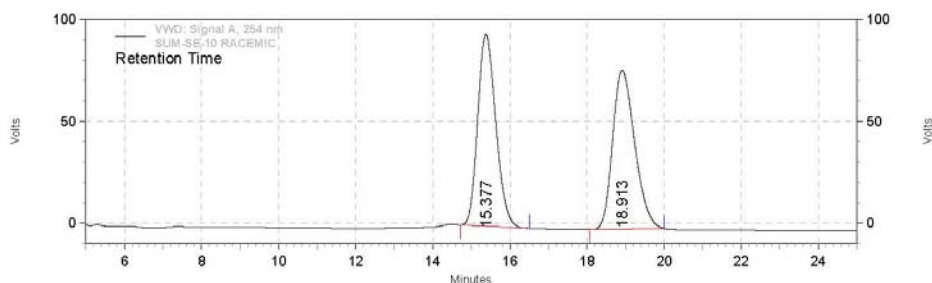

**VWD: Signal A, 254 nm Results**

| Retention Time | Area             | Area %        |
|----------------|------------------|---------------|
| 15.377         | 51414329         | 49.71         |
| 18.913         | 52024537         | 50.29         |
| <b>Totals</b>  | <b>103438866</b> | <b>100.00</b> |

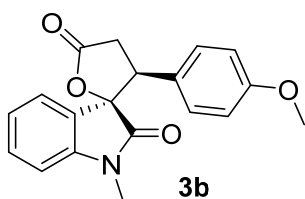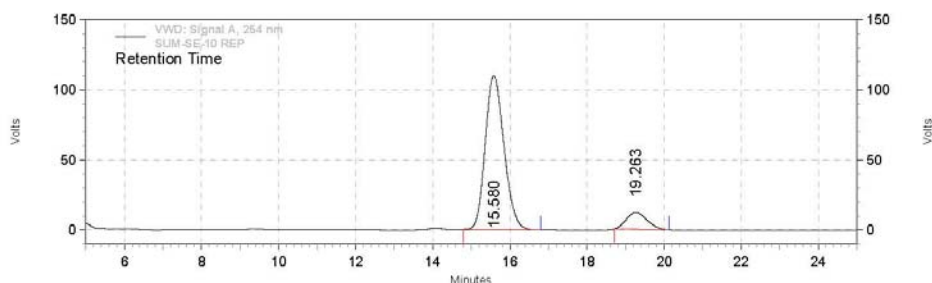

**VWD: Signal A, 254 nm Results**

| Retention Time | Area            | Area %        |
|----------------|-----------------|---------------|
| 15.580         | 62353751        | 89.07         |
| 19.263         | 7653599         | 10.93         |
| <b>Totals</b>  | <b>70007350</b> | <b>100.00</b> |

Column : Chiralpak AD  
 Eluent System : 88: 7:5(Pet Ether:MeOH:IPA)  
 Flow rate: 1.0 ml/min  
 Injection vol.: 10ul  
 Wavelength: 254 nm  
 Sample Conc.: 1 mg/ ml

# (2*R*,3*S*)-1'-Methyl-3-(*p*-tolyl)-3,4-dihydro-5*H*-spiro[furan-2,3'-indoline]-2',5-dione (**3c**)

Data File: D:\BIJU\SBM\ISATIN ALCHOLE FINAL COMPOUND\sum-se-35 me\SUM-SE-35  
RACEMIC.dat  
Method: D:\BIJU\Method\5% IPA-7% MeOH-88%PE,254NMrr, 1.0ML-MIN.MET  
Acquired: 5/4/2016 3:40:57 PM Printed: 7/12/2016 11:37:06 AM

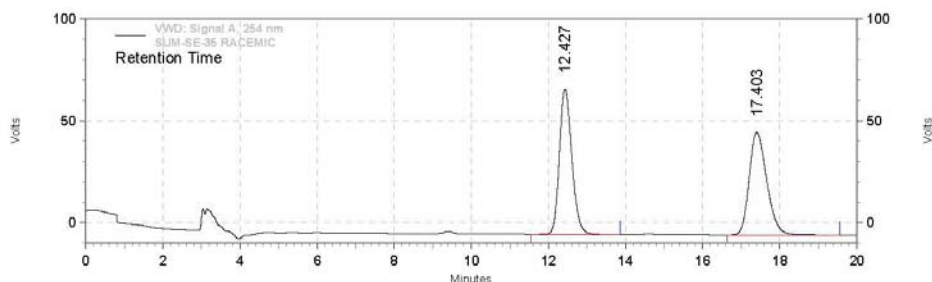

## VWD: Signal A, 254 nm Results

| Retention Time | Area     | Area % |
|----------------|----------|--------|
| 12.427         | 26764094 | 49.85  |
| 17.403         | 26922833 | 50.15  |

| Totals | Area     | Area % |
|--------|----------|--------|
|        | 53686927 | 100.00 |

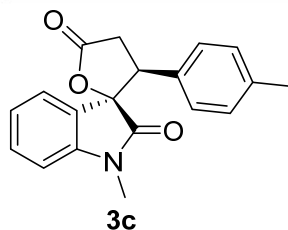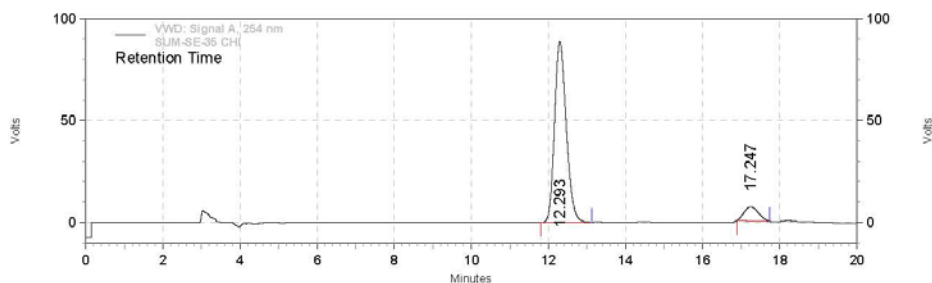

## VWD: Signal A, 254 nm Results

| Retention Time | Area     | Area % |
|----------------|----------|--------|
| 12.293         | 31347657 | 91.29  |
| 17.247         | 2989328  | 8.71   |

| Totals | Area     | Area % |
|--------|----------|--------|
|        | 34336985 | 100.00 |

Column : Chiralpak AD  
Eluent System : 88:7:5 (Pet ether:MeOH:IPA)  
Flow rate: 1.0 ml/min  
Injection vol.: 10ul  
Wavelength: 254 nm  
Sample Conc.: 1 mg/ ml

**(2*R*,3*S*)-3-(4-Fluorophenyl)-1'-methyl-3,4-dihydro-5*H*-spiro[furan-2,3'-indoline]-2',5-dione (3d)**

Data File: D:\BIJU\SBM\ISATIN ALCHOLE FINAL COMPOUND\4-f enal abb-ak-95\ABB-AK-95 RAC  
 4-F.dat  
 Method: D:\method\10% IPA-PE- C-D 1 port.met  
 Acquired: 4/27/2016 10:56:58 AM Printed: 7/12/2016 10:10:56 AM

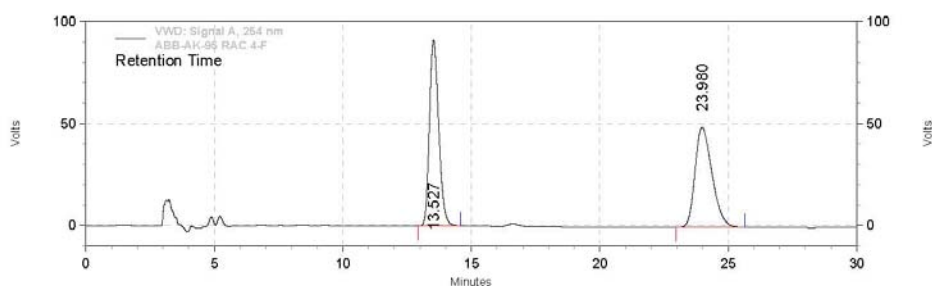

**VWD: Signal A, 254 nm Results**

| Retention Time | Area            | Area %        |
|----------------|-----------------|---------------|
| 13.527         | 38500873        | 50.37         |
| 23.980         | 37936773        | 49.63         |
| <b>Totals</b>  | <b>76437646</b> | <b>100.00</b> |

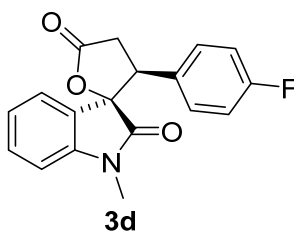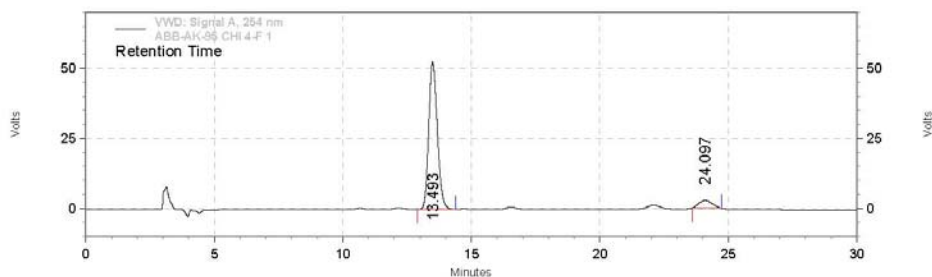

**VWD: Signal A, 254 nm Results**

| Retention Time | Area            | Area %        |
|----------------|-----------------|---------------|
| 13.493         | 20561155        | 92.59         |
| 24.097         | 1645045         | 7.41          |
| <b>Totals</b>  | <b>22206200</b> | <b>100.00</b> |

Column : Chiralpak AD  
 Eluent System : 88: 7:5(Pet Ether:MeOH:IPA)  
 Flow rate: 1.0 ml/min  
 Injection vol.: 10ul  
 Wavelength: 254 nm  
 Sample Conc.: 1 mg/ ml



# Methyl 4-((2*R*,3*S*)-1'-methyl-2',5-dioxo-4,5-dihydro-3*H*-spiro[furan-2,3'-indolin]-3-yl)benzoate (3e)

Data File: D:\BIJU\SBM\ISATIN ALCHOLE FINAL COMPOUND\4-co2me abb ak-97\ABB-AK-97 RAC  
 CO2Me.dat  
 Method: D:\method\10% IPA-PE- C-D 1 port.met  
 Acquired: 4/29/2016 4:35:05 PM Printed: 7/12/2016 9:59:08 AM

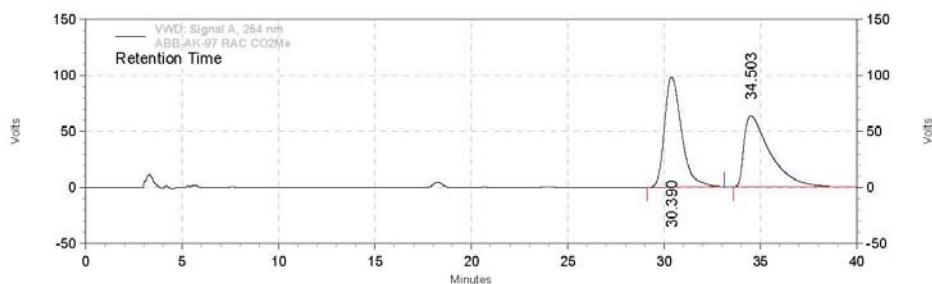

## VWD: Signal A, 254 nm Results

| Retention Time | Area             | Area %        |
|----------------|------------------|---------------|
| 30.390         | 101304668        | 50.34         |
| 34.503         | 99955890         | 49.66         |
| <b>Totals</b>  | <b>201260558</b> | <b>100.00</b> |

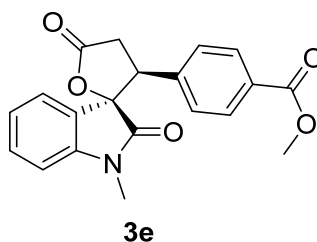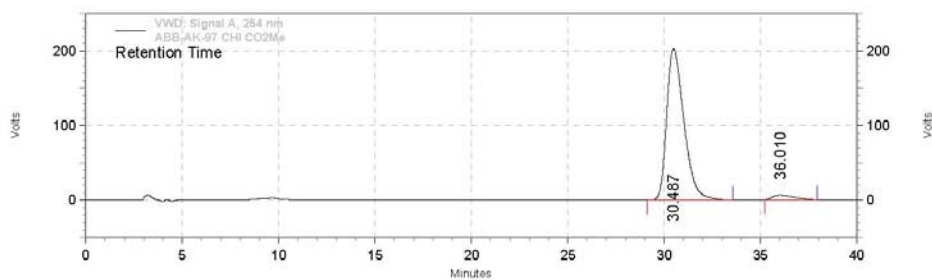

## VWD: Signal A, 254 nm Results

| Retention Time | Area             | Area %        |
|----------------|------------------|---------------|
| 30.487         | 210763918        | 96.36         |
| 36.010         | 7965598          | 3.64          |
| <b>Totals</b>  | <b>218729516</b> | <b>100.00</b> |

Column : Chiralpak AD  
 Eluent System : 88: 7:5(Pet Ether:MeOH:IPA)  
 Flow rate: 1.0 ml/min  
 Injection vol.: 10ul  
 Wavelength: 254 nm  
 Sample Conc.: 1 mg/ ml

**(2*R*,3*S*)-1'-Methyl-3-(4-(trifluoromethyl)phenyl)-3,4-dihydro-5*H*-spiro[furan-2,3'-indoline]-2',5-dione (3f)**

Data File: D:\BIJU\SBM\ISATIN ALCHOLE FINAL COMPOUND\4 cf3 enal-abb-ak-93\ABB-AU-93-4  
 CF3 ENAL.dat  
 Method: D:\method\10% IPA-PE- C-D 1 port.met  
 Acquired: 4/25/2016 12:09:41 AM Printed: 7/11/2016 7:59:08 PM

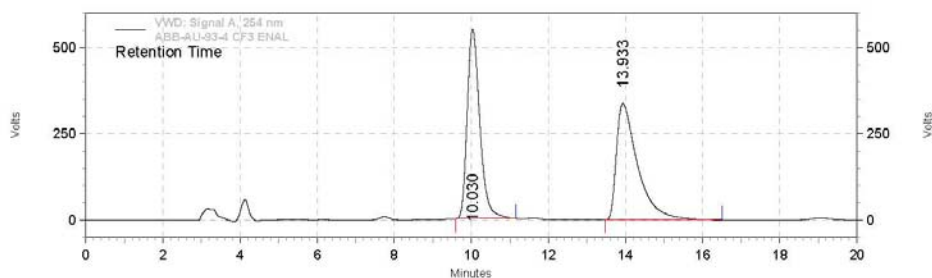

**VWD: Signal A, 254 nm Results**

| Retention Time | Area             | Area %        |
|----------------|------------------|---------------|
| 10.030         | 208862565        | 49.36         |
| 13.933         | 214247312        | 50.64         |
| <b>Totals</b>  | <b>423109877</b> | <b>100.00</b> |

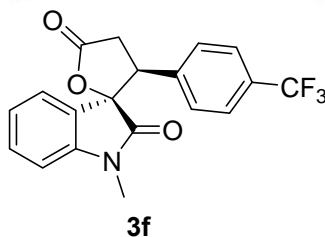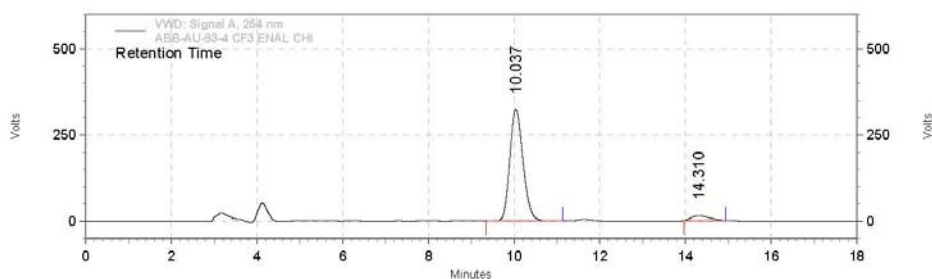

**VWD: Signal A, 254 nm Results**

| Retention Time | Area             | Area %        |
|----------------|------------------|---------------|
| 10.037         | 116039940        | 94.15         |
| 14.310         | 7209036          | 5.85          |
| <b>Totals</b>  | <b>123248976</b> | <b>100.00</b> |

Column : Chiralpak AD  
 Eluent System : 88: 7:5(Pet Ether:MeOH:IPA)  
 Flow rate: 1.0 ml/min  
 Injection vol.: 10ul  
 Wavelength: 254 nm  
 Sample Conc.: 1 mg/ml

**(2*R*,3*S*)-1'-Methyl-3-(4-nitrophenyl)-3,4-dihydro-5*H*-spiro[furan-2,3'-indoline]-2',5-dione (3g)**

Data File: D:\BIJU\SBMISATIN ALCHOLE FINAL COMPOUND\4- cf3 enal abb-ak-94\ABB-AK-94  
 RAC-NO2.dat  
 Method: D:\BIJU\Method\5% IPA-7% MeOH-88%PE,254NMrr, 1.0ML-MIN.MET  
 Acquired: 5/4/2016 8:30:13 PM Printed: 7/11/2016 7:48:39 PM

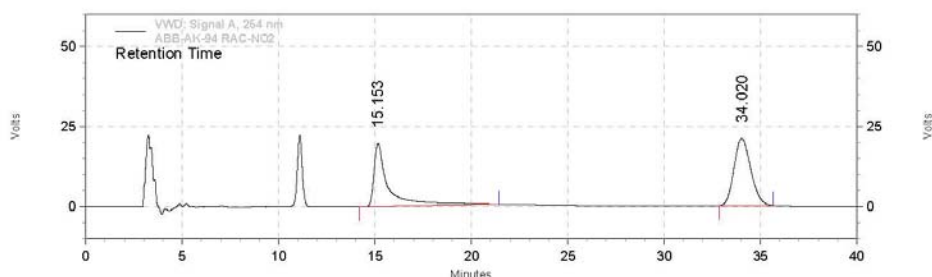

**VWD: Signal A, 254 nm Results**

| Retention Time | Area            | Area %        |
|----------------|-----------------|---------------|
| 15.153         | 17767445        | 45.36         |
| 34.020         | 21405039        | 54.64         |
| <b>Totals</b>  | <b>39172484</b> | <b>100.00</b> |

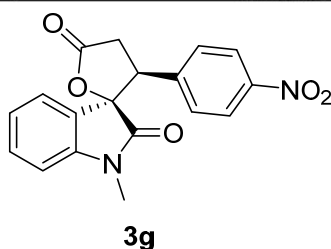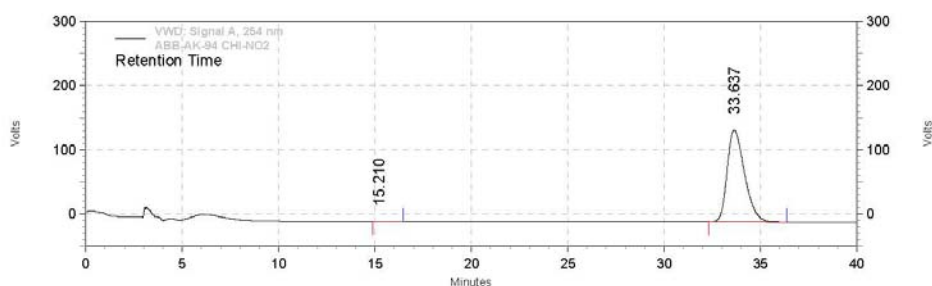

**VWD: Signal A, 254 nm Results**

| Retention Time | Area             | Area %        |
|----------------|------------------|---------------|
| 15.210         | 111633           | 0.07          |
| 33.637         | 150765014        | 99.93         |
| <b>Totals</b>  | <b>150876647</b> | <b>100.00</b> |

Column : Chiralpak AD  
 Eluent System : 88: 7:5(Pet Ether:MeOH:IPA)  
 Flow rate: 1.0 ml/min  
 Injection vol.: 10ul  
 Wavelength: 254 nm  
 Sample Conc.: 1 mg/ ml

**(2R,3S)-3-(2-Methoxyphenyl)-1'-methyl-3,4-dihydro-5H-spiro[furan-2,3'-indoline]-2',5-dione (3h)**

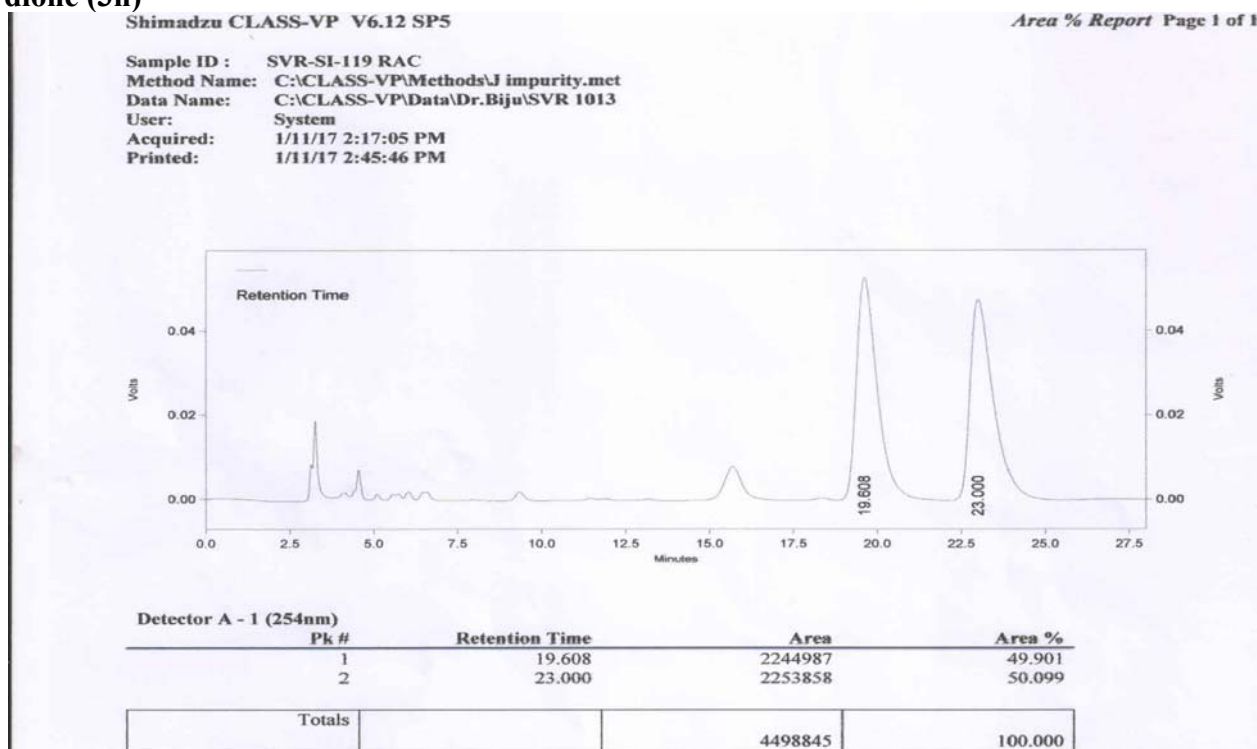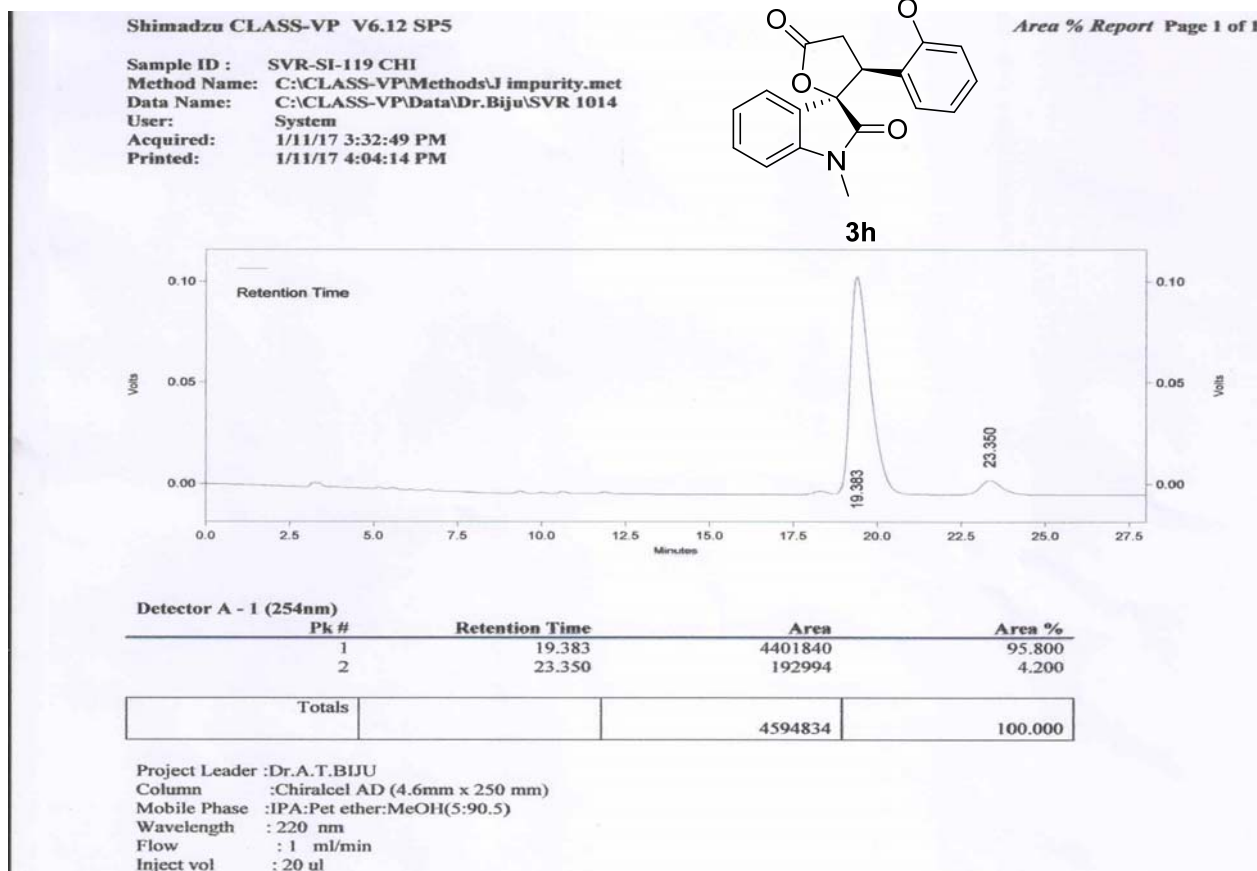

**(2*R*,3*S*)-3-(2-Fluorophenyl)-1'-methyl-3,4-dihydro-5*H*-spiro[furan-2,3'-indoline]-2',5-dione (3i)**

Shimadzu CLASS-VP V6.12 SP5  
Page 1 of 1 ABB-AK-103 RAC

Area % Report

Method Name: C:\CLASS-VP\Data\Dr. U Das\akm33 chiral  
Data Name: C:\CLASS-VP\Data\Dr. Biju\Svr2329  
User: System  
Acquired: 5/10/16 1:46:42 PM  
Printed: 5/10/16 4:01:58 PM

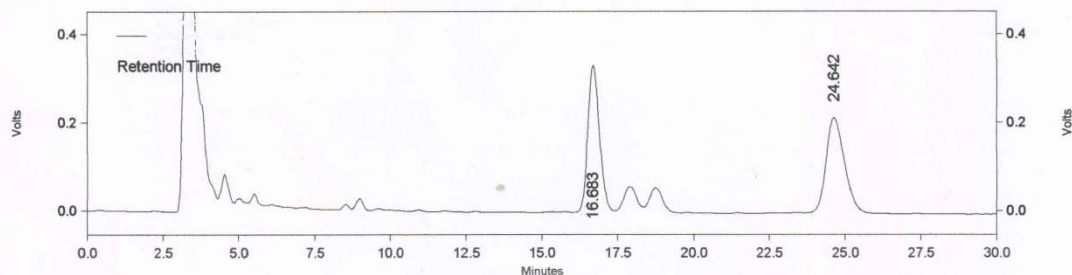

Detector A - 1 (220nm)

| Pk #          | Retention Time | Area           | Area %         |
|---------------|----------------|----------------|----------------|
| 1             | 16.683         | 4435532        | 50.855         |
| 2             | 24.642         | 4286342        | 49.145         |
| <b>Totals</b> |                | <b>8721874</b> | <b>100.000</b> |

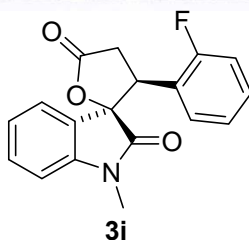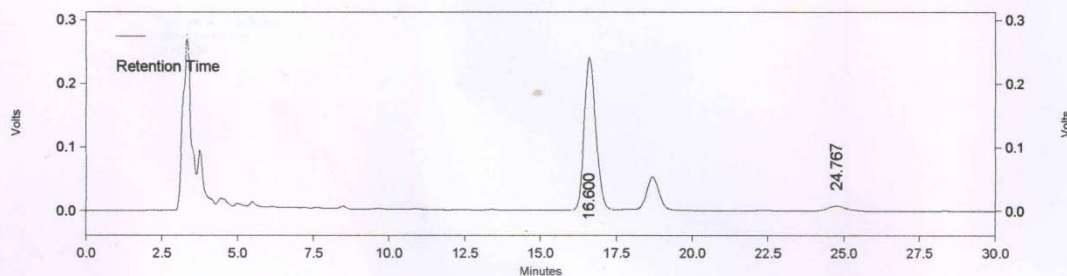

Detector A - 1 (220nm)

| Pk #          | Retention Time | Area           | Area %         |
|---------------|----------------|----------------|----------------|
| 1             | 16.600         | 6446890        | 97.391         |
| 2             | 24.767         | 172698         | 2.609          |
| <b>Totals</b> |                | <b>6619588</b> | <b>100.000</b> |

Project Leader : Dr. A. T. Biju  
Column : Chiralcel AD (250 X4.6cm)  
Mobile Phase : IPA:Pet Ether:MEOH (5:90:5)  
Flow Rate : 1 ml/min 280psi  
Wavelength : 220 nm  
Con. : 1 mg /1ml  
Inject vol. : 20ul

**(2*R*,3*S*)-3-(Furan-2-yl)-1'-methyl-3,4-dihydro-5*H*-spiro[furan-2,3'-indoline]-2',5-dione**  
**(3j)**

Data File: D:\BIJU\SBM\ISATIN ALCHOLE FINAL COMPOUND\furan enal-sum-se-12\SUM-SE-12  
 RAC.dat  
 Method: D:\BIJU\Method\5% IPA-7% MeOH-88%PE,254NMrr, 1.0ML-MIN.MET  
 Acquired: 4/20/2016 12:37:17 PM Printed: 7/12/2016 10:54:03 AM

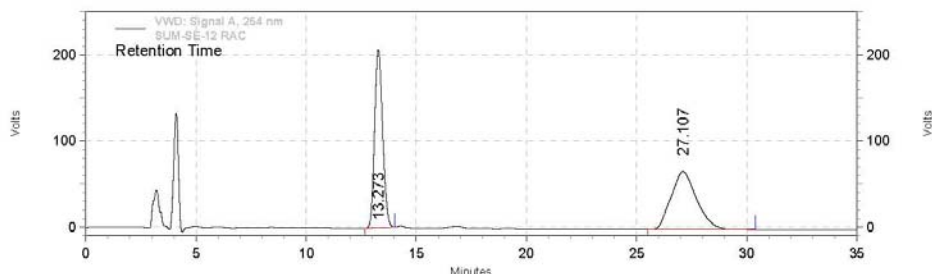

**VWD: Signal A, 254 nm Results**

| Retention Time | Area             | Area %        |
|----------------|------------------|---------------|
| 13.273         | 88487761         | 49.41         |
| 27.107         | 90617218         | 50.59         |
| <b>Totals</b>  | <b>179104979</b> | <b>100.00</b> |

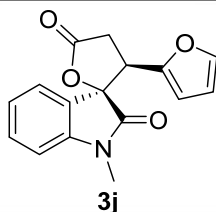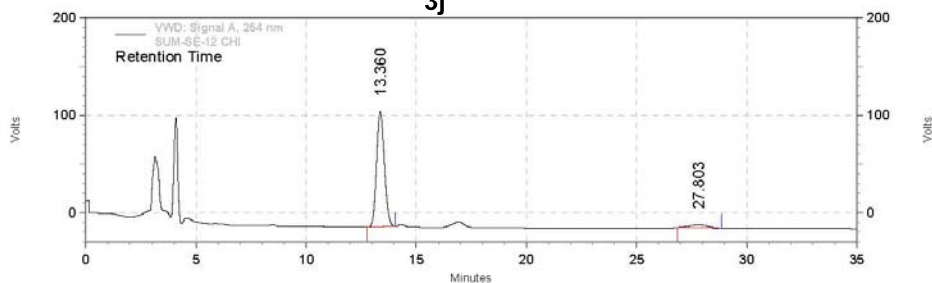

**VWD: Signal A, 254 nm Results**

| Retention Time | Area            | Area %        |
|----------------|-----------------|---------------|
| 13.360         | 48793357        | 94.02         |
| 27.803         | 3106142         | 5.98          |
| <b>Totals</b>  | <b>51899499</b> | <b>100.00</b> |

Column : Chiralpak AD  
 Eluent System : 88:7:5 (Pet ether:MeOH:IPA)  
 Flow rate: 1.0 ml/min  
 Injection vol.: 10ul  
 Wavelength: 254 nm  
 Sample Conc.: 1 mg/ml

# (2*R*,3*S*)-1'-Benzyl-3-phenyl-3,4-dihydro-5*H*-spiro[furan-2,3'-indoline]-2',5-dione (3k)

Data File: D:\BIJU\SBM\ISATIN ALCHOLE FINAL COMPOUND\benz prot-svr si-127\SVR-SI-127  
BENZ RAC.dat  
Method: D:\BIJU\Method\5% IPA-7% MeOH-88%PE,254NMrr, 1.0ML-MIN.MET  
Acquired: 4/26/2016 1:01:05 PM Printed: 7/12/2016 10:45:00 AM

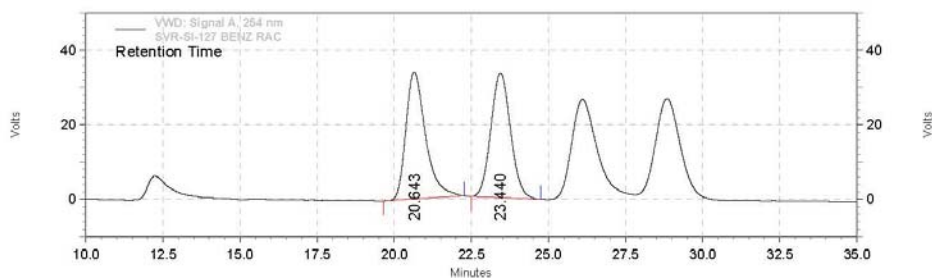

## VWD: Signal A, 254 nm Results

| Retention Time | Area     | Area % |
|----------------|----------|--------|
| 20.643         | 25413284 | 50.56  |
| 23.440         | 24847823 | 49.44  |

| Totals | Area     | Area % |
|--------|----------|--------|
|        | 50261107 | 100.00 |

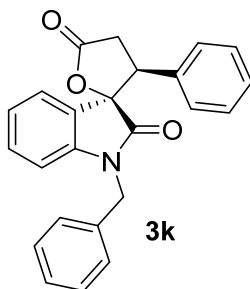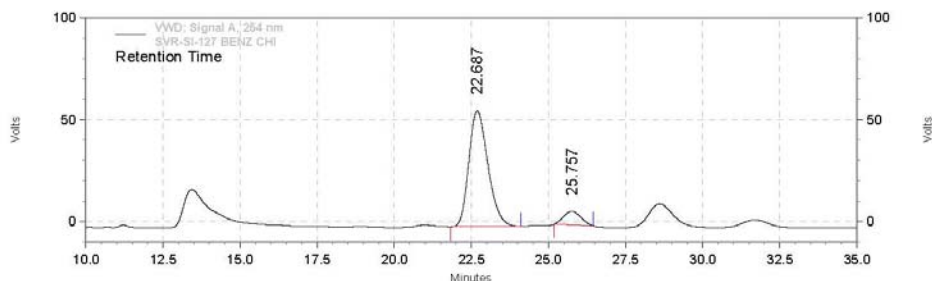

## VWD: Signal A, 254 nm Results

| Retention Time | Area     | Area % |
|----------------|----------|--------|
| 22.687         | 41016498 | 90.39  |
| 25.757         | 4360718  | 9.61   |

| Totals | Area     | Area % |
|--------|----------|--------|
|        | 45377216 | 100.00 |

Column : Chiralpak AD  
Eluent System : 88:7:5 (Pet ether:MeOH:IPA)  
Flow rate: 1.0 ml/min  
Injection vol.: 10ul  
Wavelength: 254 nm  
Sample Conc.: 1 mg/ml

# (2*R*,3*S*)-1'-Allyl-3-phenyl-3,4-dihydro-5*H*-spiro[furan-2,3'-indoline]-2',5-dione (31)

Data File: D:\BIJU\SEMI-SATIN ALCHOLE FINAL COMPOUND\sum-se-21 allylic protection\SUM-SD-231 RAC.dat  
Method: D:\BIJU\Method\5% IPA-7% MeOH-88%PE,254NM.r, 1.0ML-MIN.MET  
Acquired: 2/16/2016 12:15:24 PM Printed: 7/12/2016 11:18:40 AM

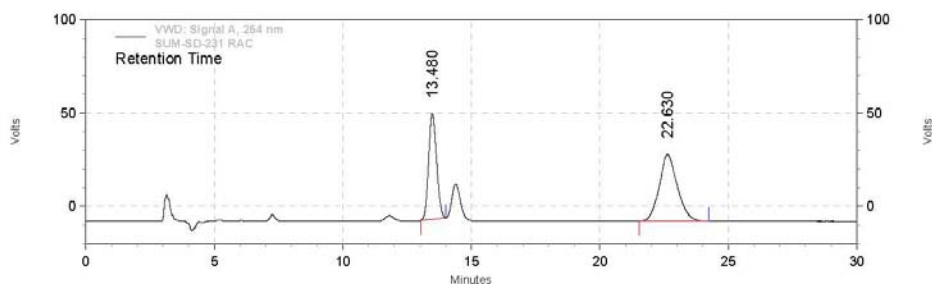

## VWD: Signal A, 254 nm Results

| Retention Time | Area     | Area % |
|----------------|----------|--------|
| 13.480         | 20587809 | 41.41  |
| 22.630         | 29126202 | 58.59  |
| Totals         | 49714011 | 100.00 |

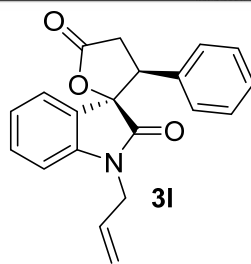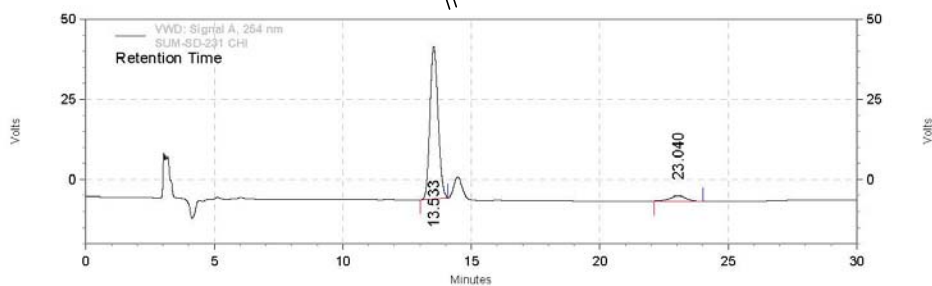

## VWD: Signal A, 254 nm Results

| Retention Time | Area     | Area % |
|----------------|----------|--------|
| 13.533         | 17501994 | 93.18  |
| 23.040         | 1281494  | 6.82   |
| Totals         | 18783488 | 100.00 |

Column : Chiralpak AD  
Eluent System : 88:7:5 (Pet ether:MeOH:IPA)  
Flow rate: 1.0 ml/min  
Injection vol.: 10ul  
Wavelength: 254 nm  
Sample Conc.: 1 mg/ml



**(2*R*,3*S*)-3-Phenyl-1'-(prop-2-yn-1-yl)-3,4-dihydro-5*H*-spiro[furan-2,3'-indoline]-2',5-dione (3m)**

Data File: D:\BIJU\SBM\ISATIN ALCHOLE FINAL COMPOUND\sum-se-22 propergylic\SUM-SE-22 RAC PROPER.dat  
 Method: D:\BIJU\Method\5% IPA-7% MeOH-88%PE,254NMrr, 1.0ML-MIN.MET  
 Acquired: 5/3/2016 11:46:31 AM Printed: 7/12/2016 11:32:19 AM

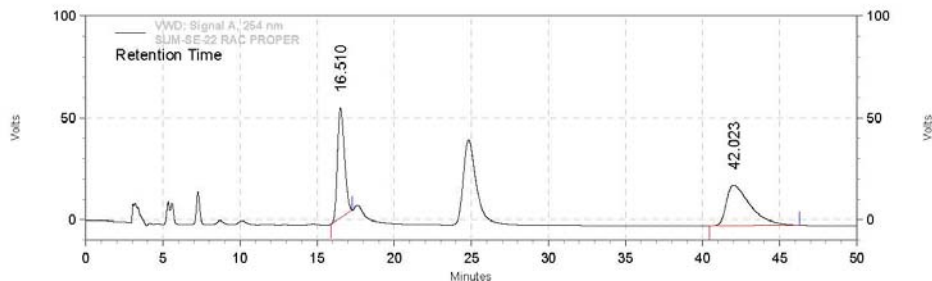

**VWD: Signal A, 254 nm Results**

| Retention Time | Area            | Area %        |
|----------------|-----------------|---------------|
| 16.510         | 28592735        | 43.86         |
| 42.023         | 36602580        | 56.14         |
| <b>Totals</b>  | <b>65195315</b> | <b>100.00</b> |

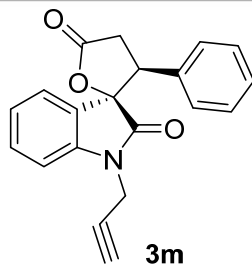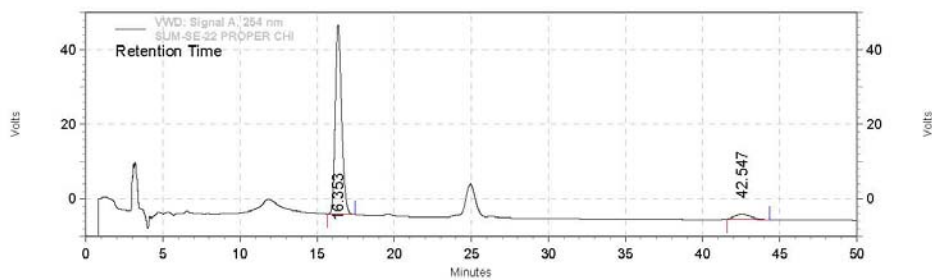

**VWD: Signal A, 254 nm Results**

| Retention Time | Area            | Area %        |
|----------------|-----------------|---------------|
| 16.353         | 24370973        | 93.75         |
| 42.547         | 1624128         | 6.25          |
| <b>Totals</b>  | <b>25995101</b> | <b>100.00</b> |

Column : Chiralpak AD  
 Eluent System : 88:7:5 (Pet ether:MeOH:IPA)  
 Flow rate: 1.0 ml/min  
 Injection vol.: 10ul  
 Wavelength: 254 nm  
 Sample Conc.: 1 mg/ml

**(2*R*,3*S*)-5'-Chloro-1'-methyl-3-phenyl-3,4-dihydro-5*H*-spiro[furan-2,3'-indoline]-2',5-dione (3n)**

Data File: D:\BIJU\SBM\ISATIN ALCHOLE FINAL COMPOUND\sum-se-18 5 cl isatin\SUM-SE-10  
 RAC.dat  
 Method: D:\BIJU\Method\5% IPA-7% MeOH-88%PE,254NMrr, 1.0ML-MIN.MET  
 Acquired: 4/23/2016 5:55:44 PM Printed: 7/12/2016 11:11:49 AM

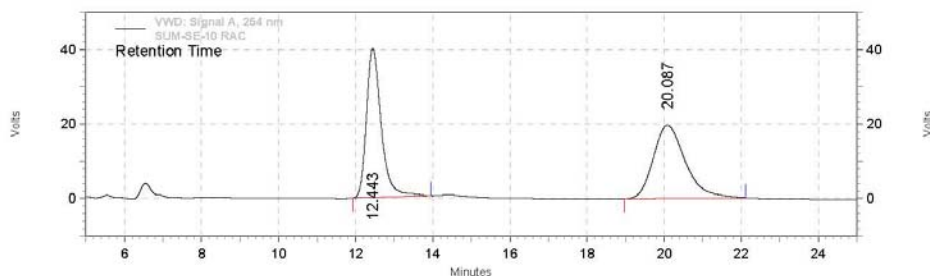

**VWD: Signal A, 254 nm Results**

| Retention Time | Area            | Area %        |
|----------------|-----------------|---------------|
| 12.443         | 17889801        | 48.41         |
| 20.087         | 19064369        | 51.59         |
| <b>Totals</b>  | <b>36954170</b> | <b>100.00</b> |

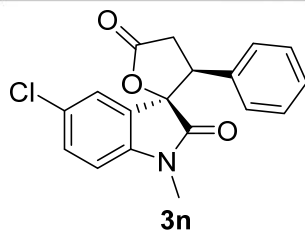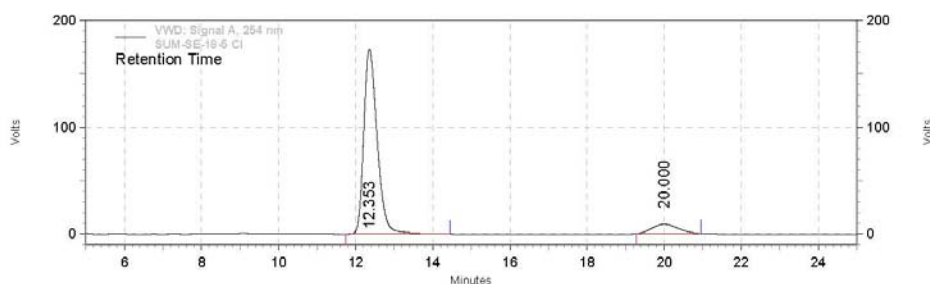

**VWD: Signal A, 254 nm Results**

| Retention Time | Area            | Area %        |
|----------------|-----------------|---------------|
| 12.353         | 70260844        | 90.79         |
| 20.000         | 7128131         | 9.21          |
| <b>Totals</b>  | <b>77388975</b> | <b>100.00</b> |

Column : Chiralpak AD  
 Eluent System : 88:7:5 (Pet ether:MeOH:IPA)  
 Flow rate: 1.0 ml/min  
 Injection vol.: 10ul  
 Wavelength: 254 nm  
 Sample Conc.: 1 mg/ml

### 3 (2*R*,3*R*)-3-Heptyl-1'-methyl-3,4-dihydro-5*H*-spiro[furan-2,3'-indoline]-2',5-dione (3o)

Data File: D:\BIJU\SBM\SVR-SI-128 RAC1 DACENAL.dat  
 Method: E:\cvi\96comp.met  
 Acquired: 4/26/2016 11:07:59 PM Printed: 11/28/2016 12:29:50 PM

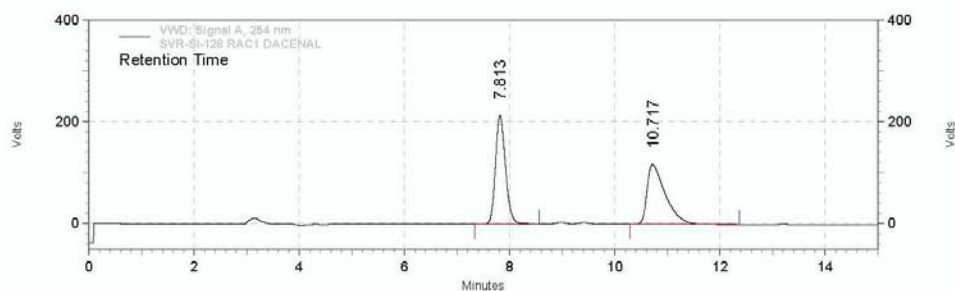

#### VWD: Signal A, 254 nm Results

| Retention Time | Area     | Area % |
|----------------|----------|--------|
| 7.813          | 47257655 | 50.04  |
| 10.717         | 47183542 | 49.96  |

| Totals | Area     | Area % |
|--------|----------|--------|
|        | 94441197 | 100.00 |

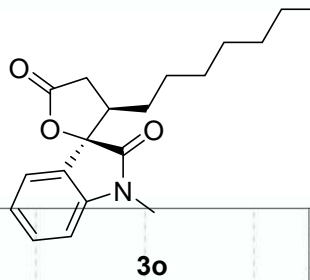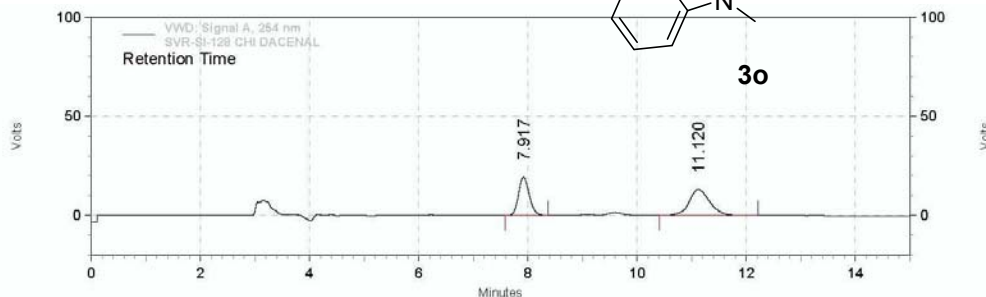

#### VWD: Signal A, 254 nm Results

| Retention Time | Area    | Area % |
|----------------|---------|--------|
| 7.917          | 4400044 | 42.98  |
| 11.120         | 5836534 | 57.02  |

| Totals | Area     | Area % |
|--------|----------|--------|
|        | 10236578 | 100.00 |

Column : Chiralcel AD-H  
 Eluent System : 88:7:5 (PE:MeOH:IPA)  
 Flow rate: 1.0 ml/min  
 Injection vol.: 10ul  
 Wavelength: 254nm  
 Sample Conc.: 1 mg/ml

## HPLC data of spiro $\gamma$ -butyrolactones synthesized in oxidant free condition (2*R*,3*S*)-1'-Methyl-3-phenyl-3,4-dihydro-5*H*-spiro[furan-2,3'-indoline]-2',5-dione (**3a**)

Data File: D:\BIJU\SBM\ISATIN ALCHOLE FINAL COMPOUND\sum-se-45\SUM-SD-228 RAC.dat  
 Method: D:\BIJU\Method\5% IPA-7% MeOH-88%PE,254NMrr, 1.0ML-MIN.MET  
 Acquired: 2/21/2016 7:32:18 AM Printed: 7/12/2016 12:03:15 PM

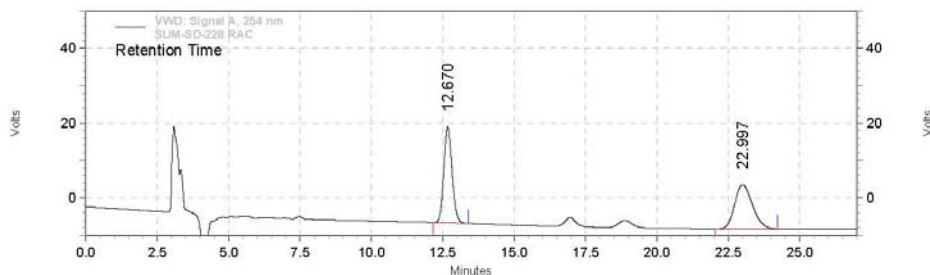

### VWD: Signal A, 254 nm Results

| Retention Time | Area    | Area % |
|----------------|---------|--------|
| 12.670         | 8610446 | 50.18  |
| 22.997         | 8547599 | 49.82  |

| Totals | Area     | Area % |
|--------|----------|--------|
|        | 17158045 | 100.00 |

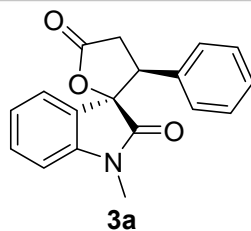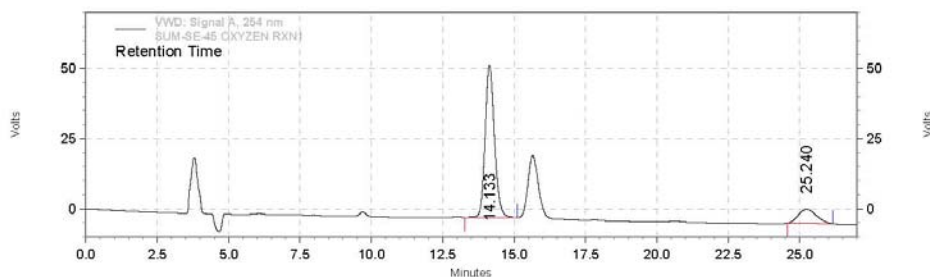

### VWD: Signal A, 254 nm Results

| Retention Time | Area     | Area % |
|----------------|----------|--------|
| 14.133         | 20733660 | 84.52  |
| 25.240         | 3797961  | 15.48  |

| Totals | Area     | Area % |
|--------|----------|--------|
|        | 24531621 | 100.00 |

Column : Chiralpak AD  
 Eluent System : 88:7:5 (Pet ether:MeOH:IPA)  
 Flow rate: 1.0 ml/min  
 Injection vol.: 10ul  
 Wavelength: 254 nm  
 Sample Conc.: 1 mg/ ml

**(2*R*,3*S*)-3-(Furan-2-yl)-1'-methyl-3,4-dihydro-5*H*-spiro[furan-2,3'-indoline]-2',5-dione**  
**(3j)**

Data File: D:\BLJU\SBM\ISATIN ALCHOLE FINAL COMPOUND\sum-se-69\SUM-SE-69 RAC.dat  
 Method: D:\BLJU\Method\5% IPA-7% MeOH-88%PE,254NM.r, 1.0ML-MIN.MET  
 Acquired: 6/7/2016 8:27:44 PM Printed: 7/12/2016 12:07:22 PM

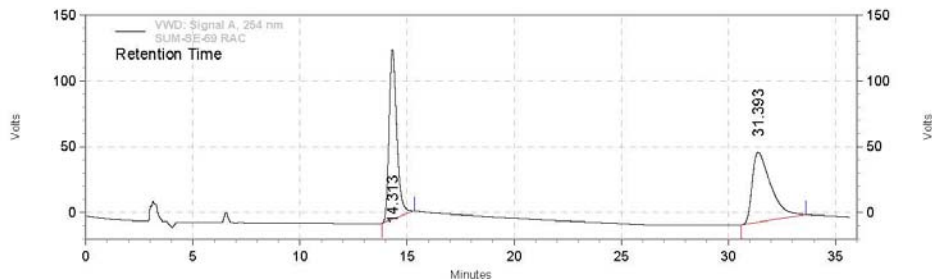

**VWD: Signal A, 254 nm Results**

| Retention Time | Area             | Area %        |
|----------------|------------------|---------------|
| 14.313         | 53816572         | 50.10         |
| 31.393         | 53605548         | 49.90         |
| <b>Totals</b>  | <b>107422120</b> | <b>100.00</b> |

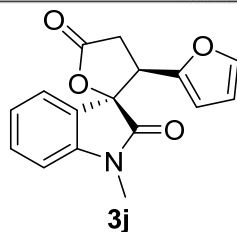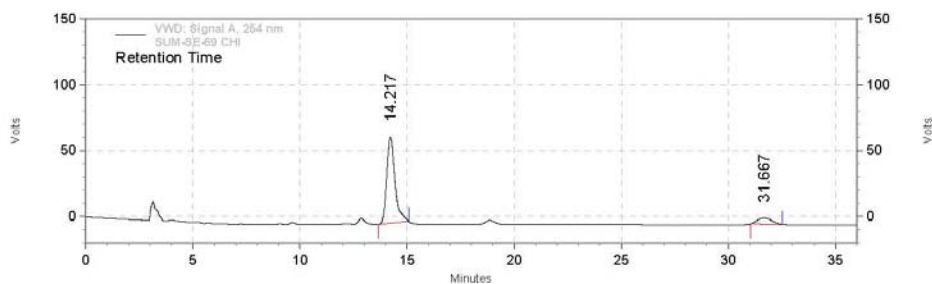

**VWD: Signal A, 254 nm Results**

| Retention Time | Area            | Area %        |
|----------------|-----------------|---------------|
| 14.217         | 29290347        | 88.33         |
| 31.667         | 3869140         | 11.67         |
| <b>Totals</b>  | <b>33159487</b> | <b>100.00</b> |

Column : Chiralpak AD  
 Eluent System : 88:7:5 (Pet ether:MeOH:IPA)  
 Flow rate: 1.0 ml/min  
 Injection vol.: 10ul  
 Wavelength: 254 nm  
 Sample Conc.: 1 mg/ml

**(2*R*,3*S*)-5'-Chloro-1'-methyl-3-phenyl-3,4-dihydro-5*H*-spiro[furan-2,3'-indoline]-2',5-dione (3n)**

Data File: D:\BIJU\SBM\ISATIN ALCHOLE FINAL COMPOUND\sum-se-75\SUM-SE-75 RAC.dat  
 Method: D:\BIJU\Method\5% IPA-7% MeOH-88%PE,254NM.r, 1.0ML-MIN.MET  
 Acquired: 6/12/2016 12:20:59 PM Printed: 7/12/2016 12:13:22 PM

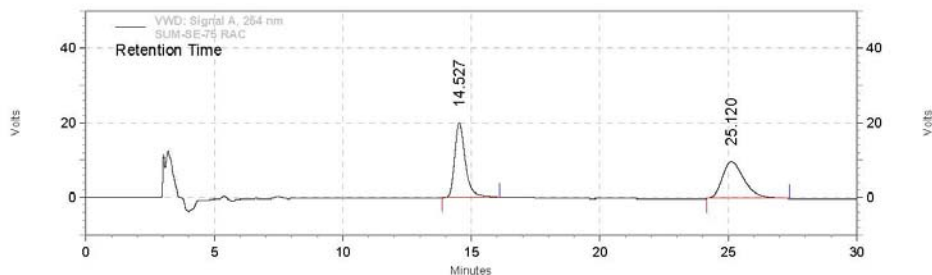

**VWD: Signal A, 254 nm Results**

| Retention Time | Area    | Area % |
|----------------|---------|--------|
| 14.527         | 9761624 | 49.87  |
| 25.120         | 9812543 | 50.13  |

|        |          |        |
|--------|----------|--------|
| Totals | 19574167 | 100.00 |
|--------|----------|--------|

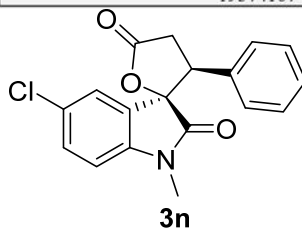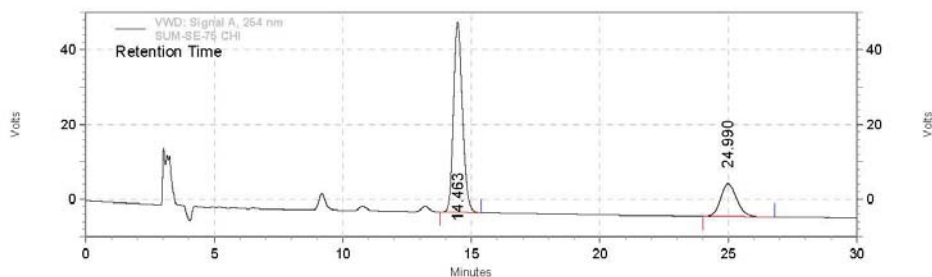

**VWD: Signal A, 254 nm Results**

| Retention Time | Area     | Area % |
|----------------|----------|--------|
| 14.463         | 20702419 | 76.46  |
| 24.990         | 6373439  | 23.54  |

|        |          |        |
|--------|----------|--------|
| Totals | 27075858 | 100.00 |
|--------|----------|--------|

Column : Chiralpak AD  
 Eluent System : 88:7:5 (Pet ether:MeOH:IPA)  
 Flow rate: 1.0 ml/min  
 Injection vol.: 10ul  
 Wavelength: 254 nm  
 Sample Conc.: 1 mg/ml
